# Supplementary material for: Spider diversity (Arachnida: Araneae) in Atlantic Forest areas at Pedra Branca State Park, Rio de Janeiro, Brazil
Source: Biodivers Data J. 2016 Jan 15;(4):e7055. doi: 10.3897/BDJ.4.e7055 (PMC4759435; doi:10.3897/BDJ.4.e7055)
Supplement: Supplementary material 1 — Most Abundant Species at Pedra Branca State Park [file biodiversity_data_journal-4-e7055-s001.xlsx]

## Sheet: Spabun
1	2050
2	647
3	601
4	579
5	545
6	488
7	450
8	386
9	335
10	324
11	249
12	210
13	198
14	190
15	187
16	176
17	156
18	153
19	149
20	148
21	146
22	146
Mesabolivar luteus
Mesabolivar togatus
Micrathena sanctispiritus
Cryptachaea digitus
Chrysometa ludibunda
Patrera cita
Paravulsor pulcher
Thwaitesia affinis
Carapoia sp. n.
Janula bicorniger
Cryptachaea rioensis
Ctenus aff. vehemens
Echinotheridion cartum
Wagneriana dimastophora
Theridion sp. n.
Azilia boudeti
Cyclosa fililineata
Metagonia sp. n.
Philoponella fasciata
Miagrammopes guttatus
Mesabolivar sp. n.
Tmarus sp. 02
