# Supplementary material for: Spider diversity (Arachnida: Araneae) in Atlantic Forest areas at Pedra Branca State Park, Rio de Janeiro, Brazil
Source: Biodivers Data J. 2016 Jan 15;(4):e7055. doi: 10.3897/BDJ.4.e7055 (PMC4759435; doi:10.3897/BDJ.4.e7055)
Supplement: Supplementary material 2 — Estimates [file biodiversity_data_journal-4-e7055-s002.xlsx]

## Sheet: TabEst
Origem	(Vários itens)
Soma de IND			Localidade	Coletor	Data	Técnica	Amostra
			PE Pedra Branca, Camorim, P3, sede
			Baptista, R. L. C.																																														Castanheira, P.
			02.vi.2013				12.vi.2013			2.vi.2013				22.ix.2013	15.ix.2013										1-9.vi.2013	16.xii.2013							31.iii.2014			09.i.2014		9.i.2014			7.iv.2014								01.vi.2013
			CVLB dia	CVLB noite		Raspagem	Ambientes Especiais		CVLA dia	Batida de Vegetação	Folhiço	CVLA noite		Ambientes Especiais	Ambientes Especiais	Batida de Vegetação	CVLB dia	CVLB noite		Folhiço	Raspagem	CVLA noite		CVLA dia	Pitfall	Ambientes Especiais		Batida de Vegetação	CVLB dia	Folhiço	Raspagem	CVLA dia	Batida de Vegetação	Folhiço	Raspagem	CVLA noite		Aleatória	CVLB noite		Ambientes Especiais		CVLB dia	CVLB noite		CVLA noite		CVLA dia	Raspagem
Família	Gênero	espécie	CVLB dia	CVLB noite 1	CVLB noite 2	Raspagem	Ambientes Especiais 1	Ambientes Especiais 2	CVLA dia	Batida de Vegetação	Folhiço	CVLA noite 1	CVLA noite 2	Ambientes Especiais 2	Ambientes Especiais 1	Batida de Vegetação	CVLB dia	CVLB noite 1	CVLB noite 2	Folhiço	Raspagem	CVLA noite 1	CVLA noite 2	CVLA dia	Pitfall 1	Ambientes Especiais 1	Ambientes Especiais 2	Batida de Vegetação	CVLB dia	Folhiço	Raspagem	CVLA dia	Batida de Vegetação	Folhiço	Raspagem	CVLA noite 1	CVLA noite 2	buraco parede casa CEDAE	CVLB noite 1	CVLB noite 2	Ambientes Especiais 1	Ambientes Especiais 2	CVLB dia	CVLB noite 1	CVLB noite 2	CVLA noite 1	CVLA noite 2	CVLA dia	Raspagem
Amaurobiidae	Retiro	lanceolatus
Anapidae	Anapis	sp. n. 02
	Pseudanapis	sp. n.
Anyphaenidae	Anyphaenoides	cf. clavipes
	Arachosia	praesignis
	Aysha	affinis								1																		6
		borgmeyeri																					1	1							1		3
	Iguarima	censoria
	Isigonia	sp. n. aff. limbata	1
	Jessica	osoriana
	Oxysoma	sp. 01
	Patrera	cita			1	3			1	5		2		1		7			1		3	2		5				12			2	3	6		1	1	3		1	2					1			1	1
	Wulfilopsis	cf. frenata														3						1		1				1
	Xiruana?	sp. 01							1
Araneidae	Acacesia	tenella
	Alpaida	aff. morro "similar a A. tijuca, mas sem mancha central no esterno, que só tem as bordas negras, e com área ocular toda negra, às vezes com área cefálica toda negra, sem bordeados claros irregulares, abdome mais pontudo atrás, tamanho total bem menor
		alticeps
		atomaria			1					2		4				1						1									1
		sp. n. aff. sumare "abdome pálido, com ponta romba anterior e terminando em ponta larga triangular atrás, área entre ponta posterior e fiandeiras negra
		tijuca	1	8	4	1	4					1	2	1	2		1	4	2	1							1		3															4	2
		truncata	2		1	2			1										1										1						1	1								1		1	1
	Araneus	iguacu			3							1	1																																	2
		omnicolor																														2																1
		sp. 01
		stabilis																																			1												1
		tijuca																					1									1				1	2		1										1
		venator				2				2		2											7													3	6										4		2
	Cyclosa	caroli														1
		fililineata		1	1				4	3		2	5		1	2		1				8	4					2	4			5	4			4	5		2	1				1	5	2	2	8
		morretes	3				1												1				2			1																				1
	Eustala	aff. levii																					1																							1
		aff. photographica											1			1						1	1													1	1
		levii
		sagana				1				1													2													1											1
		taquara
	Gasteracantha	cancriformis				1
	Kaira	altiventer
	Kapogea	sp. n. aff. sellata
	Mangora	aripeba				8																																											3
		enseada																																	1
		missa
		ramirezi										1	1																						1
	Metazygia	bahia
		laticeps	1			2																	1																									1
	Metepeira	sp. 01
	Micrathena	annulata		1		2			2			4	1						2		1	2	2						1		3						1									2	1		1
		horrida																																		1
		sanctispiritus	30	47	20	31			3		7	1	10	1		1	14	9	10		22	3	1	2		1	3		11	2	19				6	1	1		5	9			3	5		1	1	2	7
	Ocrepeira	gnomo
	Parawixia	audax		1						1												1																						1
		monticola																1																						1				1
		velutina	2	1																																													2
	Pronous	tuberculifer	3		2						1														1
	Scoloderus	cordatus
	Taczanowskia	striata
	Tatepeira	itu
	Testudinaria	sp. n. aff. gravatai																																	1
	Verrucosa	meridionalis							1	7		1									1							1																					1
	Wagneriana	dimastophora	1						1			3	2						1		1	4	1																							1
		gavensis	2	5		1									1			1																											1
Barychelidae	Neodiplothele	fluminensis
	Paracenobiobelma?	sp. 01
Caponiidae	Caponina	tijuca
	Nops	sp. n.
Clubionidae	Clubionidae	sp. 01 "corpo amarelo pálido uniforme, olhos pequenos"					1																			2	3
Corinnidae	"Corinna"	inermis
	Castianeira	brevis
		sp. 01 "abdome oblongo, cefalotórax negro, com área posterior pálida nos jovens pequenos, abdome com metade anterior pálida e metade posterior negra, pernas com muitos artículos negros, mas coxas, trocanteres, tarsos e terço distal do dorso dos fêmures pálidos, tíbias, metatarsos e tarsos I-II com faixa lateral negra contínua, jovem bem pequeno com pernas todas brancas"								1
		sp. 02 "abdome bem longo, cefalotórax negro, abdome negro com 2 faixas transversais de pelos prateados, pernas com muitos artículos negros, mas coxas, trocanteres, tarsos e terço distal do dorso dos fêmures pálidos, tíbia e metatarso IV com anel negro terminal, artículos terminais da perna I todos brancos"
	Corinna	aff. capito																																						1
		aff. mourai
		nitens																																			1
		sp. 01 aff. ducke " corpo castanho-enegrecido, abdome longo, com 2 manchas triangulares claras grandes no terço inicial, pernas com artículos basais claros, faixas negras longitudinais nos fêmures I-III e e anel negro mediano no fêmur IV, artículos distais predominantemente negros, mas tarsos castanhos, esterno negro"				1
		sp. 02 " carapaça castanho-enegrecida, com pontos claros esparsos, abdome oblongo, castanho acinzentado, pernas amarelas, com faixas negras longitudinais em todos os artículos, exceto os tarsos amarelados, tíbia com 3 pares espinhos ventrais, esterno similar ao dorso do abdome"																		1
		sp. 03 "carapaça larga, achatada, castanho-enegrecido, com faixas marginais castanho claras, abdome oblongo, violáceo e enegrecido, pernas amarelas, com faixas negras longitudinais nos fêmures e patelas e tíbias negras, esterno e ventre pálidos"
	Creugas	sp. 01 "F com epígino apresentando abertura mediana, M com ATR achatada, com um ramo interno longo e fino e o externo curvo em foice"																								1													1	1		1
		sp. 02 "F com margem posterior do epígino projetada em ponta aguda, M com ATR larga, com metade apical excavada e com 2 projeções digitiformes apicais"																																								2
	Ianduba	varia
	Myrmecium	obscurum										2
		rufum																														2
	Paradiestus	sp. 01 aff. giganteus
	Stethorrhagus	sp. n. aff. oxossi
	Tupirinna	sp. n.								1						1															1		1
	Xeropigo	sp. n.
Ctenidae	Ctenus	aff. vehemens						1			1																															1		1
		medius									2						1	1																					1					2
		ornatus																								2	1													1				1	2
	Enoploctenus	cf. maculipes																	2							1													1		1	1
		cyclothorax											1					1								1
	Isoctenus	griseolus
	Phoneutria	keyserlingi
Deinopidae	Deinopis	plurituberculata																																			1
Eutichuridae	Radulphius	laticeps
		sp. n. aff. bicolor "carapaça castanho alaranjado, abdome amarelo pálido, coberto por cerdas enegrecidas, olhos grandes, ATR longa, com protuberância subterminal e ápice mais fino, êmbolo longo, circular, originando-se no meio do címbio"					1																																							1
	Strotarchus	tropicus
Gnaphosidae	Apodrassodes	sp. n. aff. mono
	Poecilochroa	cf. trifasciata
	Xenoplectus	sp. n.
	Zimiromus	sp. 01
Hahniidae	Hahnia	sp. 01
	Neohahnia	sp. 01
Hersiliidae	Ypypuera	crucifera																																												2
Idiopidae	Idiops	camelus
		germaini
Linyphiidae	Dubiaranea	cf. inquilina
	Erigone	autumnalis																										1
	Erigoninae	sp. 01									1
		sp. 02 "similar a sp. 1, mas meno, com abdome mais curto e largo, dorso do abdome também com um par de manchas no terço posterior, mas com 2 faixas laterais descendo do terço anterior para o médio e unindo-se a um grande campo negro ventral antes das fiandeiras
	Laminacauda	sp. n. aff. amabilis
	Lygarina	sp. n. aff. caracasana																										1
	Meioneta	aff. montivaga
		sp. n. aff. luctuosa	1																																						1
		sp. n. aff. straminicola																							1
	Moyosi	sp. n. aff. rugosa									3									6					2					3				5
	Sphecozone	rubescens
		sp. n. aff. personata
	Vesicapalpus	simplex		1			1				1														3	1			1	5											5	2
Liocranidae	Liocranidae	sp. 01									1									1
Mimetidae	Gelanor	altithorax														1
		zonatus																					1												1
	Mimetus	sp. 01 "abdome em losango, com dois tubérculos curtos nos ângulos, F com epígino similar a M. catharinae, com margem posterior do epígino truncada, M com palpo pequeno, tégulo discoidal, quase esférico, de comprimento similar ao do címbio, o qual não é modificado, ATR robusta alongada, com uma projeção basal grande e arredondada"														1											1	1	1
		sp. 02 "Maior, abdome pouco mais largo que longo, com dois tubérculos altos nos ângulos, epígino com crista alta mediana, palpo grande, com címbio modificado retrolateralmente, com sulco profundo e margem ventral espessada"			2								1		1				1												1				1				1						1
		sp. 03 "F com abdome muito mais largo que longo, com dois tubérculos altos nos ângulos, epígino similar a M. catharinae, com margem posterior do epígino formando projeção triangular e espermatecas convolutas finas, M com palpo pequeno, tégulo discoidal, quase esférico, de comprimento similar ao do címbio, o qual não é modificado, ATR pequena, curta, com uma projeção fina basal"																										1
		sp. 04 "F com abdome mais largo que longo, com dois tubérculos altos distantes dos ângulos, epígino similar a M. catharinae, com margem posterior do epígino formando projeção triangular e com espermatecas convolutas grossas, M com palpo médio, tégulo discoidal, maior que o címbio, o qual não é modificado, apófise média grande, em vírgula voltada para baixo, ATR afinando regulamente até ponta um p…
		sp. 05 "carapaça com desenho castanho enegrecido, abdome esbranquiçado, com duas faixas negras laterais junto às fiandeiras, abdome alto e muito mais largo atrás, com dois tubérculos diminutos afastados das margens e com declive forte após tubérculos, epígino com margem posterior projetada em ponta romba e côncava no meio da margem posterior, espermatecas longas e largas em forma de saca-rolhas, …
Miturgidae	Paravulsor	pulcher																							1															1					2
Mysmenidae	Maymena	sp. n.					2
	Mysmena	sp. 01
	Mysmenopsis	archeri	1																																					1
Nemesiidae	Chaco	sp. n. aff. melloleitaoi "grande, mais escura, rastelo fraco, sem cerdas rígidas diferenciadas, maxilas planas e não projetadas atrás, com cerca de 50 cúspulas, pernas com fêmures normais, longos, ventre salpicado com manchas escuras, M com tíbia I com megaespinho retrolateral, bulbo largo, subretangular, com êmbolo transversal e quilhas membranosas largas e côncavas, indo até o ápice do êmbolo"
	Gen. n. aff. Prorachias	sp. n. "carapaça glabra, maxilas curtas, com cotovelo posterior curto e largo e com cerca de 20 cúspulas, tarsos I-II dos M engrossados, tíbia do palpo curta e inflada, bulbo com êmbolo apresentando quilhas laterais em flap de cada lado
	Prorachias	sp. n. aff. bristowei "carapaça hirsuta, maxilas longas, com cotovelo posterior longo e triangular e sem cúspulas, tarsos dos M flexuosos finos, tíbia do palpo longa e inflada, bulbo com êmbolo simples e quilhas rudimentares
	Rachias	conspersus
		sp. n. aff. dispar "Rio"
	Stenoterommata	sp. 02 "pequena, mais clara, ventre unicolor, rastelo quase inexistente, maxilas planas e não projetadas atrás, com cerca de 30 cúspulas, pernas com fêmures normais, longos, M com tíbia do palpo curta, sem protuberância e espinhos prolaterais, címbio piriforme, com quilhas fracas, inconspícuas, êmbolo curto, transversal, e com ponta triangular curtal"																												1
		sp. 03 "pequena, mais clara, rastelo fraco, com algumas cerdas rígidas, maxilas planas e não projetadas atrás, com cerca de 30 cúspulas, pernas com fêmures normais, longos, M com tíbia do palpo curta, sem protuberância e espinhos prolaterais, címbio cônico, com quilhas abundantes e conspícuas, projetadas apicalmente, deslocando o êmbolo curvo e fino para uma posição aparentemente subapical"
Nephilidae	Nephila	clavipes										1	1						1			2							2		1					3	1						1
Ochyroceratidae	Ochyrocera	sp. n. 01 "pequeno, carapaça amarelada com 3 faixas azuis enegrecidas, abdome oblongo azul pálido, M com procurso pequeno e pontiagudo e êmbolo muito longo, tubular e curvo"
		sp. n. 02 "medio, carapaça azul escuro, com apenas a área central pálida, abdome longo, tubular, azul escuro, moqueado de azul claro no dorso, M com címbio apresentando 2 espinhos na origem do procurso, o qual é grande e pontiagudo, êmbolo de tamanho médio, um pouco curvo, afinando regularmente para o ápice"
	Theotima	minutissima									2									5										3				2
Oonopidae	Neoxyphinus	keyserlingi									1																							1
	Oonopinae	sp. 03 "carapaça alaranjada, abdome amarelo-pálido, olhos bem grandes, fêmur I com 3 espinhos prolaterais, tíbia I com 5 pares de espinhos, fêmur IV engrossado, F com vulva simples, aparecendo como um ponto mais escuro na margem posterior, acima do qual existe uma fileira marginal de cerdas, M com área cefálica modificada, com sulcos escuros profundos delimitando-a, quelícera modificada com escle…																		1														3
		sp. 05 "carapaça alaranjada, abdome amarelo-pálido, olhos bem grandes, fêmur I mútico, tíbia I com 3 pares de espinhos fracos, fêmur IV engrossado, F com área genital opaca, vulva não visível, margem do sulco epigástrico um pouco escavada no meio
		sp. 06 "carapaça amarelada, abdome amarelo-pálido, olhos grandes, com OMP elípticos, alongados, fêmur I com 3 espinhos prolaterais, tíbia I com 5 pares de espinhos, fêmur IV engrossado
		sp. 07 "carapaça amarelada, abdome cinzento, olhos bem grandes, fêmur I com 2 espinhos prolaterais, tíbia I com 5 pares de espinhos fortes, fêmur IV engrossado, F com margem do sulco epigástrico muito escavada no meio, recuando bastante, genitália interna com T alongado pouco visível																															1
	Triaeris	stenaspis						1												2
Oxyopidae	Oxyopes	cf. rubrosignatus
Palpimanidae	Fernandezina	tijuca																		1														1
	Otiothops	sp. n. aff. hoeferi "êmbolo com ápice curvado em uma pequena projeção que afina rapidamente para o ápice"
Philodromidae	Berlandiella	cf. insignis
Pholcidae	Carapoia	sp. n. 02 "corpo bem menor, M com procurso pouco curvo e apófise da quelícera com muitas cerdas"
		sp. n. aff. ubatuba	2					6						4	4		5	1	1							2	7													5		1	3	3	8
	Litoporus	iguassuensis
	Mesabolivar	brasiliensis																1
		cyaneotaeniatus		5	1	2						3	1			1		2	2		1	2	6						4			3				3	2				1		4	1	1	1	5	5
		difficilis					2	1			1			1						1																				1	2
		luteus	2	2		4			21	16		13	34			24	2	10	2		9	27	8	34			1	7	1		6	26	16		4	12	18		11	3			9	2	1	24	12	31
		sp. n. "Marapendi"									1			1
		sp. n. aff. argentinensis
		sp. n. aff. cyaneomaculatus																									3														1
		togatus	17	1	8		19	9	1					2	7		13	3	13				1			3			5										4	10	6	6	1	23	7			1
	Metagonia	furcata
		sp. n. aff. beni							5				2				1							11
		sp. n. aff. bicornis																																			1
		sp. n. aff. nadleri				1			2	1		5				2		4	3			4		3					1				2		1	2	2		1				11	3	2	4	2	2
		sp. n. aff. petropolis 3
	Tupigea	sp. n. 01 "F com faixa enegrecida larga em toda parte cefálica, clípeo negro na F e com apenas faixa estreita no M, quelíceras negras, pernas curtas, com anéis negros na F e pernas longs, com anéis pequenos, quase indistintos no M"								1	2																														1
Pisauridae	Architis	brasiliensis
Prodidomidae	Lygromma	sp. n. 02
Salticidae	Acragas	sp. n. aff. trimaculatus
	Arnoliseus	sp. n. aff. calcarifer																											1
		sp. n. aff. graciosa				4				1
	Breda	cf. milvina
	Chira	lucina																																												1
		thysbe
	Chirothecia	aff. semiornata
	Coryphasia	aff. albibarbis "Pedra Branca"																														1							1
		albibarbis				5				2			1			5					1							4				1	2								1						1
	Cotinusa	magna														1									1			1	1		1		1
	Cylistella	cuprea								1
	Encolpius	guaraniticus
	Erica	eugenia								3																						1	1
	Euophrys?	sp. 01
	Itata	sp. n. aff. tipuloides							1																											1											1
	Lyssomanes	austerus														1																																	1
	Mago	aff. longidens
	Mopiopia	sp. 01 aff. tristis "carapaça marrom escura, com área cefálica mais clara, pernas e abdome amarelo claro, dorso deste com duas faixas irregulares cinza enegrecido, fiandeiras anteriores e mediana negras e posteriores amarelo claro, êmbolo com uma base alta da qual sai a espiral final, a qual situa-se em ângulo de 90 graus com o eixo do bulbo"
	Noegus	bidens														1																					1
		comatulus				2				9												2		1				3			1				1		1		2	1						1		1	1
	Phiale	mimica				1
	Pseudofluda	cf. pulcherrima
	Romitia?	sp. 01
	Salticidae	sp. 02 "similar a sp. 6, mas menor, corpo um pouco achatado, área cefálica negra, área torácica castanha, abdome um pouco alongado, castanho acinzentado, epígino com 2 espermatecas grandes, arredondadas, posteriores, 2 aberturas laterais anteriores e dutos curvos, medianos, bem visíveis"
		sp. 07 "similar sp. 4, corpo curto, carapaça negra, com área triangular após a fóvea creme, um par de tufos de cerdas brancas nas laterais da região ocular, esterno amarelo, abdome com dorso negro, com um par de manchas brancas anteriores e um par de faixas brancas inclinadas posteriores, ventre amarelo-pálido, pernas amarelas uniformes, F com epígino triangular alongado, aberturas bem anteriores…
		sp. 08 "corpo curto, carapaça pálida, com área ocular negra e 2 faixas transversais enegrecidas após fóvea, abdome com dorso cinzento, com um par de faixas brancas em torno de fólio cinza escuro no terço anterior, seguidas por 3 a 4 pares de manchas claras em V invertido interrompido no meio, esterno e ventre amarelo-pálidos, pernas amareladas, com patelas apresentando margem distal enegrecida, F…																		1														1
		sp. 09 "similar sp. 4, corpo curto, carapaça castanho enegrecido, com 2 faixas transversais prateadas, esterno enegrecido, abdome com dorso negro, com 2 faixas brancas transversais, uma na margem anterior e outra no início do terço posterior, entre elas há 2 manchas redondas brancas e atrás da última faixa, que é interrompida no meio, uma mancha alongada branca, ventre com faixa negra junto às fi…
	Semnolius	sp. 02															1
		sp. n. aff. chrysotrichus
	Tariona	bruneti																																															1
		gounellei																										2									1
	Thiodina	sp. n. 01 seg. Pires, 2003																										1
	Vinnius	uncatus
Scytodidae	Scytodes	aff. lineatipes																											1		1
		itapevi
Segestriidae	Ariadna	sp. 02
Selenopidae	Selenops	melanurus																			1
Senoculidae	Senoculus	iricolor
		sp. 01
Sicariidae	Loxosceles	adelaida
Sparassidae	Caayguara	albus
		cupepemayri																																			1
		pinda				7																																		1									6
	Polybetes	rapidus
	Stasina	americana
Synotaxidae	Synotaxus	longicaudatus							1	1		2	1																																		1
Tetragnathidae	Azilia	boudeti	2				3	1									1		1								1		1											1			1		1
	Chrysometa	boraceia
		ludibunda									1						1		2		4		1	1							2					1			2	2			1						2
		sp. n. 01																					1
	Dolichognatha	pinheiral
	Leucauge	formosa																				1															1
		pulcherrima																1				1														3				4
		turbida				1																																											1
	Metinae	sp. 01 aff. Cardimia
	Tetragnatha	cladognatha												1				3				2														11	1			10							1
		sp. 01
Theraphosidae	Catumiri	sp. 01
	Eupalaestrus	spinosissimus																																				1
	Homoeomma	familiare																																					1
	Lasiodora	fallax
	Magulla	buecherli
	Plesiopelma	sp. 01																								1
Theridiidae	Achaearanea	tingo
	Anelosimus	dubiosus
		ethicus
		studiosus
	Argyrodes	elevatus
	Chrosiothes	niteroi										1						4					1																				1			1
		sp. n. aff. perfidus
	Chrysso	compressa							3							5			1			1	1					2				2	1			4	4									1	1
	Coleosoma	floridanum									2
	Cryptachaea	aff. pilaton																																											2
		bellula
		dea	1	4				1			1						1	1																						1		1		1
		digitus	4	2		1	1	1		4	3	1	1	3	7	4	1	1	1								4	2	5		1		1			1	1		2	4	1		3	5	3	2		1
		hirta
		inops																																		1							1
		passiva	1						1			2	2		2	1							1	1									1													2
		rioensis	2	1	4			1							8		2		1								1		2											1	3		1	5	6				2
		sicki
		sp. n. aff. oblivia "carapaça marrom, com pigmento cinza-enegrecido esparso, abdome amarelado, com duas séries de manchas cinza-enegrecidas, anel arroxeado em torno das fiandeiras, pernas amarelas, uniformes, esterno castanho-avermelhado, epígino formado por uma crista alta e fina posterior, cujas extremidades portam as aberturas copulatórias dos dutos, os quais são largos e visíveis posteriormen…													1
		triguttata								1		1				2		1			1			1				1									1
	Cryptachaea?	sp. 01
	Dipoena	aff. cordiformis
		aff. hortoni
		aff. kuyuwini																															1
		bryantae
		cornuta
		ira																										1			1		1
		militaris														1												1																		1
		niteroi								1																										1
		pumicata			2			1					1					1										2																	6	2
		pusilla
		sicki
		sp. n. aff. granulata 1																										1					2
		sp. n. aff. granulata 2
		sp. n. aff. plaumanni									3
	Echinotheridion	cartum	2		1			1	1			3	3																										2						1	1		3
	Episinus	cognatus																			1
	Exalbidion	sp. n. aff. sexmaculatum								1		2	2										1	2																				1		1	1	1
	Faiditus	acuminatus										2						1																		2				3
		aff. jamaicensis								1
		caudatus																				1	1														1									1			1
	Janula	bicorniger		4	1	2				1	1		2			1					2	3	1	2							2		1		2		1			5
	Lasaeola	aff. donaldi
	Neospintharus	rioensis
	Parasteatoda	tesselata
	Phoroncidia	rubromaculata
	Rhomphaea	metaltissima
	Spintharus	gracilis														1
	Stemmops	sp. n. aff. carius																							1					2															2
		sp. n. aff. questa
		sp. n. aff. servus
	Styposis	sp. n. aff. colorados																		6										10				2							1
	Theridion	aff. hispidum "abdome palido, com um par de manchas negras anterior e outro posterior, entre elas há um grande número de manchas irregulares brancas
		biezankoi																					1													3	6
		calcynatum																																		4	3										1
		sp. n. aff. bergi "carapaça castanho claro, abdome amarelo pálido, com 2 faixas negras irregulares laterais e margem anterior projetada em aparelho estridulante grande sobre a carapaça
		sp. n. aff. cohni "carapaça pálida com pigmento negro esparso nas laterais, abdome com 2 faixas negras ladeando fólio branco na metade anterior, metade posterior esbranquiçada, salpicada de negro, ventre com mancha branca mediana e anel negro em torno das fiandeiras, F com epígino apresentando posteriormente grande lábio côncavo, retangular, com fóvea estreita e larga na margem anterior do lábio,…								1													3														2											1
		sp. n. aff. niveum "F toda amarelo-pálido, epígino formado por uma simples fenda transversal, com 2 espermatecas oblongas, grandes, anteriores, M com abdome com 2 manchas negras pequenas nas laterais anteriores do dorso e uma mancha negra maior, terminal, área ocular anterior projetada para frente e com cerdas e com 2 pequenos tubérculos no clípeo, palpo complexo com apófise lateral em forma de v…											3			16					1	2	2					5					1
		sp. n. aff. opolon "cefalotórax amarelo-alaranjado, com bordas enegrecidas, abdome amarelo pálido, geralmente com 3 pares de manchas negras laterais, ladeando 4 pares de manchas brancas no eixo mediano, grande mancha negra posterior, epígino com área mediana da margem posterior projetada para cima, precedida por uma concavidade rasa, a qual é ladeada pelos dutos negros, paralelos, vazando nos lad…
		sp. n. aff. topo																				2
		teresae							1	1	1					1					2	1	1	2				3					1														1
	Thwaitesia	affinis		2						4		1	1			5		2	1		1	2	2	1				5			1		3		1		2									1
	Thymoites	sp. n. aff. melloleitaoni	1		1	8	1	4							1	1				2	15							1	1	4	22			3	1								2
	Tidarren	haemorrhoidale																																											1
	Wamba	crispulus
	Wirada	tijuca			1
Theridiosomatidae	Chthonos	sp. n. 01 "atypica"			1																3			1									1		1
		tuberosa								1						1					1							1					1
	Theridiosoma	sp. n. 01 "abdome cinzento, com faixa prateada no final do terço anterior e campo negro após"													1																									1
		sp. n. 02 "abdome todo negro"		1
		sp. n. 03 "abdome pálido, com área anterior prateada, um par de manchas negras laterais na parte posterior da área prateada e uma série de manchas negras irregulares até o final do dorso"
	Wendilgarda	cf. nigra
Thomisidae	Acentroscelus	cf. secundus																										1					1		1
	Epicadinus	gavensis				2
	Epicadus	planus								1																																							1
	Misumenops	cf. callinurus
	Onocolus	simoni																										1			1
	Strophius	nigricans
	Tmarus	aff. albolineatus
		sp. 03 "corpo curto, carapaça castanho escura, com abundantes manchas mais claras, declive posterior enegrecido, abdome pentagonal, sem tubérculo, castanho, com faixas transversais alternadas quase brancas e escuras, abundantes pontos de cor vinho na fóvea, também existentes nas pernas, ATR robusta, projetando-se para cima do bulbo, com projeção espiniforme fina na face externa, projeção tegular …								1																		1									1									1
		sp. 04 "corpo alongado, carapaça castanho clara, com 2 faixas longitudinais mais escuras abaixo dos OLP, declive posterior castanho escuro, abdome alongado, sem tubérculo, mas bem mais largo no final do terço médio, abundante pigmento branco e vinho no dorso, pernas castanhas, com abundantes manchas vinho e faixa castanho escura no fêmur I"
		sp. 05 "corpo alongado, carapaça castanha, com pigmento branco e pontos cor de vinho, campo negro posterior apenas lateral, parte inicial do declive branca, laterais castanho-escuras e parte traseira castanha, pernas castanhas, com pigmento branco no fêmur, abdome alongado, esbranquiçado, muito alto, sem tubérculo, mas com acentuado declive no final do terço médio, epígino com grande fóvea anteri…																										1
	Tobias	cf. caudatus																										5					1		2
Trachelidae	Trachelas	robustus
		vitiosus														2
Trechaleidae	Enna	aff. redundans				3																1														1	1												1
	Trechaleoides	biocellata																																					2	1
Uloboridae	Philoponella	fasciata	10	1			1		4	1		2	4				1					1						1	1			1				2	1						7	1	3		2	10
		vittata
	Uloborus	sp. 01
Zodariidae	Tenedos	eduardoi
Total geral			92	88	55	98	37	28	55	78	36	63	84	15	36	95	45	54	50	28	71	78	57	69	10	16	26	79	48	30	68	48	54	18	27	69	76	1	41	72	24	15	49	62	58	59	39	69	36
[truncated: 354 more columns]

## Sheet: DadEst
Soma de IND			Localidade	Coletor	Data	Técnica	Amostra
			PE Pedra Branca, Camorim, P3, sede
			Baptista, R. L. C.																																														Castanheira, P.
			02.vi.2013				12.vi.2013			2.vi.2013				22.ix.2013	15.ix.2013										1-9.vi.2013	16.xii.2013							31.iii.2014			09.i.2014		9.i.2014			7.iv.2014								01.vi.2013
			CVLB dia	CVLB noite		Raspagem	Ambientes Especiais		CVLA dia	Batida de Vegetação	Folhiço	CVLA noite		Ambientes Especiais	Ambientes Especiais	Batida de Vegetação	CVLB dia	CVLB noite		Folhiço	Raspagem	CVLA noite		CVLA dia	Pitfall	Ambientes Especiais		Batida de Vegetação	CVLB dia	Folhiço	Raspagem	CVLA dia	Batida de Vegetação	Folhiço	Raspagem	CVLA noite		Aleatória	CVLB noite		Ambientes Especiais		CVLB dia	CVLB noite		CVLA noite		CVLA dia	Raspagem
Família	Gênero	espécie	CVLB dia	CVLB noite 1	CVLB noite 2	Raspagem	Ambientes Especiais 1	Ambientes Especiais 2	CVLA dia	Batida de Vegetação	Folhiço	CVLA noite 1	CVLA noite 2	Ambientes Especiais 2	Ambientes Especiais 1	Batida de Vegetação	CVLB dia	CVLB noite 1	CVLB noite 2	Folhiço	Raspagem	CVLA noite 1	CVLA noite 2	CVLA dia	Pitfall 1	Ambientes Especiais 1	Ambientes Especiais 2	Batida de Vegetação	CVLB dia	Folhiço	Raspagem	CVLA dia	Batida de Vegetação	Folhiço	Raspagem	CVLA noite 1	CVLA noite 2	buraco parede casa CEDAE	CVLB noite 1	CVLB noite 2	Ambientes Especiais 1	Ambientes Especiais 2	CVLB dia	CVLB noite 1	CVLB noite 2	CVLA noite 1	CVLA noite 2	CVLA dia	Raspagem
Amaurobiidae	Retiro	lanceolatus	0	0	0	0	0	0	0	0	0	0	0	0	0	0	0	0	0	0	0	0	0	0	0	0	0	0	0	0	0	0	0	0	0	0	0	0	0	0	0	0	0	0	0	0	0	0	0
Anapidae	Anapis	sp. n. 02	0	0	0	0	0	0	0	0	0	0	0	0	0	0	0	0	0	0	0	0	0	0	0	0	0	0	0	0	0	0	0	0	0	0	0	0	0	0	0	0	0	0	0	0	0	0	0
	Pseudanapis	sp. n.	0	0	0	0	0	0	0	0	0	0	0	0	0	0	0	0	0	0	0	0	0	0	0	0	0	0	0	0	0	0	0	0	0	0	0	0	0	0	0	0	0	0	0	0	0	0	0
Anyphaenidae	Anyphaenoides	cf. clavipes	0	0	0	0	0	0	0	0	0	0	0	0	0	0	0	0	0	0	0	0	0	0	0	0	0	0	0	0	0	0	0	0	0	0	0	0	0	0	0	0	0	0	0	0	0	0	0
	Arachosia	praesignis	0	0	0	0	0	0	0	0	0	0	0	0	0	0	0	0	0	0	0	0	0	0	0	0	0	0	0	0	0	0	0	0	0	0	0	0	0	0	0	0	0	0	0	0	0	0	0
	Aysha	affinis	0	0	0	0	0	0	0	1	0	0	0	0	0	0	0	0	0	0	0	0	0	0	0	0	0	6	0	0	0	0	0	0	0	0	0	0	0	0	0	0	0	0	0	0	0	0	0
		borgmeyeri	0	0	0	0	0	0	0	0	0	0	0	0	0	0	0	0	0	0	0	0	1	1	0	0	0	0	0	0	1	0	3	0	0	0	0	0	0	0	0	0	0	0	0	0	0	0	0
	Iguarima	censoria	0	0	0	0	0	0	0	0	0	0	0	0	0	0	0	0	0	0	0	0	0	0	0	0	0	0	0	0	0	0	0	0	0	0	0	0	0	0	0	0	0	0	0	0	0	0	0
	Isigonia	sp. n. aff. limbata	1	0	0	0	0	0	0	0	0	0	0	0	0	0	0	0	0	0	0	0	0	0	0	0	0	0	0	0	0	0	0	0	0	0	0	0	0	0	0	0	0	0	0	0	0	0	0
	Jessica	osoriana	0	0	0	0	0	0	0	0	0	0	0	0	0	0	0	0	0	0	0	0	0	0	0	0	0	0	0	0	0	0	0	0	0	0	0	0	0	0	0	0	0	0	0	0	0	0	0
	Oxysoma	sp. 01	0	0	0	0	0	0	0	0	0	0	0	0	0	0	0	0	0	0	0	0	0	0	0	0	0	0	0	0	0	0	0	0	0	0	0	0	0	0	0	0	0	0	0	0	0	0	0
	Patrera	cita	0	0	1	3	0	0	1	5	0	2	0	1	0	7	0	0	1	0	3	2	0	5	0	0	0	12	0	0	2	3	6	0	1	1	3	0	1	2	0	0	0	0	1	0	0	1	1
	Wulfilopsis	cf. frenata	0	0	0	0	0	0	0	0	0	0	0	0	0	3	0	0	0	0	0	1	0	1	0	0	0	1	0	0	0	0	0	0	0	0	0	0	0	0	0	0	0	0	0	0	0	0	0
	Xiruana?	sp. 01	0	0	0	0	0	0	1	0	0	0	0	0	0	0	0	0	0	0	0	0	0	0	0	0	0	0	0	0	0	0	0	0	0	0	0	0	0	0	0	0	0	0	0	0	0	0	0
Araneidae	Acacesia	tenella	0	0	0	0	0	0	0	0	0	0	0	0	0	0	0	0	0	0	0	0	0	0	0	0	0	0	0	0	0	0	0	0	0	0	0	0	0	0	0	0	0	0	0	0	0	0	0
	Alpaida	aff. morro "similar a A. tijuca, mas sem mancha central no esterno, que só tem as bordas negras, e com área ocular toda negra, às vezes com área cefálica toda negra, sem bordeados claros irregulares, abdome mais pontudo atrás, tamanho total bem menor	0	0	0	0	0	0	0	0	0	0	0	0	0	0	0	0	0	0	0	0	0	0	0	0	0	0	0	0	0	0	0	0	0	0	0	0	0	0	0	0	0	0	0	0	0	0	0
		alticeps	0	0	0	0	0	0	0	0	0	0	0	0	0	0	0	0	0	0	0	0	0	0	0	0	0	0	0	0	0	0	0	0	0	0	0	0	0	0	0	0	0	0	0	0	0	0	0
		atomaria	0	0	1	0	0	0	0	2	0	4	0	0	0	1	0	0	0	0	0	1	0	0	0	0	0	0	0	0	1	0	0	0	0	0	0	0	0	0	0	0	0	0	0	0	0	0	0
		sp. n. aff. scriba	1	0	0	0	0	0	0	0	0	0	0	0	0	0	0	0	0	0	1	1	0	0	0	0	0	0	0	0	0	0	0	0	0	0	0	0	0	0	0	0	0	1	0	0	0	0	0
		sp. n. aff. sumare "abdome pálido, com ponta romba anterior e terminando em ponta larga triangular atrás, área entre ponta posterior e fiandeiras negra	0	0	0	0	0	0	0	0	0	0	0	0	0	0	0	0	0	0	0	0	0	0	0	0	0	0	0	0	0	0	0	0	0	0	0	0	0	0	0	0	0	0	0	0	0	0	0
		tijuca	1	8	4	1	4	0	0	0	0	1	2	1	2	0	1	4	2	1	0	0	0	0	0	0	1	0	3	0	0	0	0	0	0	0	0	0	0	0	0	0	0	4	2	0	0	0	0
		truncata	2	0	1	2	0	0	1	0	0	0	0	0	0	0	0	0	1	0	0	0	0	0	0	0	0	0	1	0	0	0	0	0	1	1	0	0	0	0	0	0	0	1	0	1	1	0	0
	Araneus	iguacu	0	0	3	0	0	0	0	0	0	1	1	0	0	0	0	0	0	0	0	0	0	0	0	0	0	0	0	0	0	0	0	0	0	0	0	0	0	0	0	0	0	0	0	2	0	0	0
		omnicolor	0	0	0	0	0	0	0	0	0	0	0	0	0	0	0	0	0	0	0	0	0	0	0	0	0	0	0	0	0	2	0	0	0	0	0	0	0	0	0	0	0	0	0	0	0	1	0
		sp. 01	0	0	0	0	0	0	0	0	0	0	0	0	0	0	0	0	0	0	0	0	0	0	0	0	0	0	0	0	0	0	0	0	0	0	0	0	0	0	0	0	0	0	0	0	0	0	0
		stabilis	0	0	0	0	0	0	0	0	0	0	0	0	0	0	0	0	0	0	0	0	0	0	0	0	0	0	0	0	0	0	0	0	0	0	1	0	0	0	0	0	0	0	0	0	0	0	1
		tijuca	0	0	0	0	0	0	0	0	0	0	0	0	0	0	0	0	0	0	0	0	1	0	0	0	0	0	0	0	0	1	0	0	0	1	2	0	1	0	0	0	0	0	0	0	0	0	1
		venator	0	0	0	2	0	0	0	2	0	2	0	0	0	0	0	0	0	0	0	0	7	0	0	0	0	0	0	0	0	0	0	0	0	3	6	0	0	0	0	0	0	0	0	0	4	0	2
	Cyclosa	caroli	0	0	0	0	0	0	0	0	0	0	0	0	0	1	0	0	0	0	0	0	0	0	0	0	0	0	0	0	0	0	0	0	0	0	0	0	0	0	0	0	0	0	0	0	0	0	0
		fililineata	0	1	1	0	0	0	4	3	0	2	5	0	1	2	0	1	0	0	0	8	4	0	0	0	0	2	4	0	0	5	4	0	0	4	5	0	2	1	0	0	0	1	5	2	2	8	0
		morretes	3	0	0	0	1	0	0	0	0	0	0	0	0	0	0	0	1	0	0	0	2	0	0	1	0	0	0	0	0	0	0	0	0	0	0	0	0	0	0	0	0	0	0	1	0	0	0
	Eustala	aff. levii	0	0	0	0	0	0	0	0	0	0	0	0	0	0	0	0	0	0	0	0	1	0	0	0	0	0	0	0	0	0	0	0	0	0	0	0	0	0	0	0	0	0	0	1	0	0	0
		aff. photographica	0	0	0	0	0	0	0	0	0	0	1	0	0	1	0	0	0	0	0	1	1	0	0	0	0	0	0	0	0	0	0	0	0	1	1	0	0	0	0	0	0	0	0	0	0	0	0
		levii	0	0	0	0	0	0	0	0	0	0	0	0	0	0	0	0	0	0	0	0	0	0	0	0	0	0	0	0	0	0	0	0	0	0	0	0	0	0	0	0	0	0	0	0	0	0	0
		sagana	0	0	0	1	0	0	0	1	0	0	0	0	0	0	0	0	0	0	0	0	2	0	0	0	0	0	0	0	0	0	0	0	0	1	0	0	0	0	0	0	0	0	0	0	1	0	0
		taquara	0	0	0	0	0	0	0	0	0	0	0	0	0	0	0	0	0	0	0	0	0	0	0	0	0	0	0	0	0	0	0	0	0	0	0	0	0	0	0	0	0	0	0	0	0	0	0
	Gasteracantha	cancriformis	0	0	0	1	0	0	0	0	0	0	0	0	0	0	0	0	0	0	0	0	0	0	0	0	0	0	0	0	0	0	0	0	0	0	0	0	0	0	0	0	0	0	0	0	0	0	0
	Kaira	altiventer	0	0	0	0	0	0	0	0	0	0	0	0	0	0	0	0	0	0	0	0	0	0	0	0	0	0	0	0	0	0	0	0	0	0	0	0	0	0	0	0	0	0	0	0	0	0	0
	Kapogea	sp. n. aff. sellata	0	0	0	0	0	0	0	0	0	0	0	0	0	0	0	0	0	0	0	0	0	0	0	0	0	0	0	0	0	0	0	0	0	0	0	0	0	0	0	0	0	0	0	0	0	0	0
	Mangora	aripeba	0	0	0	8	0	0	0	0	0	0	0	0	0	0	0	0	0	0	0	0	0	0	0	0	0	0	0	0	0	0	0	0	0	0	0	0	0	0	0	0	0	0	0	0	0	0	3
		enseada	0	0	0	0	0	0	0	0	0	0	0	0	0	0	0	0	0	0	0	0	0	0	0	0	0	0	0	0	0	0	0	0	1	0	0	0	0	0	0	0	0	0	0	0	0	0	0
		missa	0	0	0	0	0	0	0	0	0	0	0	0	0	0	0	0	0	0	0	0	0	0	0	0	0	0	0	0	0	0	0	0	0	0	0	0	0	0	0	0	0	0	0	0	0	0	0
		ramirezi	0	0	0	0	0	0	0	0	0	1	1	0	0	0	0	0	0	0	0	0	0	0	0	0	0	0	0	0	0	0	0	0	1	0	0	0	0	0	0	0	0	0	0	0	0	0	0
	Metazygia	bahia	0	0	0	0	0	0	0	0	0	0	0	0	0	0	0	0	0	0	0	0	0	0	0	0	0	0	0	0	0	0	0	0	0	0	0	0	0	0	0	0	0	0	0	0	0	0	0
		laticeps	1	0	0	2	0	0	0	0	0	0	0	0	0	0	0	0	0	0	0	0	1	0	0	0	0	0	0	0	0	0	0	0	0	0	0	0	0	0	0	0	0	0	0	0	0	1	0
	Metepeira	sp. 01	0	0	0	0	0	0	0	0	0	0	0	0	0	0	0	0	0	0	0	0	0	0	0	0	0	0	0	0	0	0	0	0	0	0	0	0	0	0	0	0	0	0	0	0	0	0	0
	Micrathena	annulata	0	1	0	2	0	0	2	0	0	4	1	0	0	0	0	0	2	0	1	2	2	0	0	0	0	0	1	0	3	0	0	0	0	0	1	0	0	0	0	0	0	0	0	2	1	0	1
		horrida	0	0	0	0	0	0	0	0	0	0	0	0	0	0	0	0	0	0	0	0	0	0	0	0	0	0	0	0	0	0	0	0	0	1	0	0	0	0	0	0	0	0	0	0	0	0	0
		sanctispiritus	30	47	20	31	0	0	3	0	7	1	10	1	0	1	14	9	10	0	22	3	1	2	0	1	3	0	11	2	19	0	0	0	6	1	1	0	5	9	0	0	3	5	0	1	1	2	7
	Ocrepeira	gnomo	0	0	0	0	0	0	0	0	0	0	0	0	0	0	0	0	0	0	0	0	0	0	0	0	0	0	0	0	0	0	0	0	0	0	0	0	0	0	0	0	0	0	0	0	0	0	0
	Parawixia	audax	0	1	0	0	0	0	0	1	0	0	0	0	0	0	0	0	0	0	0	1	0	0	0	0	0	0	0	0	0	0	0	0	0	0	0	0	0	0	0	0	0	1	0	0	0	0	0
		monticola	0	0	0	0	0	0	0	0	0	0	0	0	0	0	0	1	0	0	0	0	0	0	0	0	0	0	0	0	0	0	0	0	0	0	0	0	0	1	0	0	0	1	0	0	0	0	0
		velutina	2	1	0	0	0	0	0	0	0	0	0	0	0	0	0	0	0	0	0	0	0	0	0	0	0	0	0	0	0	0	0	0	0	0	0	0	0	0	0	0	0	0	0	0	0	0	2
	Pronous	tuberculifer	3	0	2	0	0	0	0	0	1	0	0	0	0	0	0	0	0	0	0	0	0	0	1	0	0	0	0	0	0	0	0	0	0	0	0	0	0	0	0	0	0	0	0	0	0	0	0
	Scoloderus	cordatus	0	0	0	0	0	0	0	0	0	0	0	0	0	0	0	0	0	0	0	0	0	0	0	0	0	0	0	0	0	0	0	0	0	0	0	0	0	0	0	0	0	0	0	0	0	0	0
	Taczanowskia	striata	0	0	0	0	0	0	0	0	0	0	0	0	0	0	0	0	0	0	0	0	0	0	0	0	0	0	0	0	0	0	0	0	0	0	0	0	0	0	0	0	0	0	0	0	0	0	0
	Tatepeira	itu	0	0	0	0	0	0	0	0	0	0	0	0	0	0	0	0	0	0	0	0	0	0	0	0	0	0	0	0	0	0	0	0	0	0	0	0	0	0	0	0	0	0	0	0	0	0	0
	Testudinaria	sp. n. aff. gravatai	0	0	0	0	0	0	0	0	0	0	0	0	0	0	0	0	0	0	0	0	0	0	0	0	0	0	0	0	0	0	0	0	1	0	0	0	0	0	0	0	0	0	0	0	0	0	0
	Verrucosa	meridionalis	0	0	0	0	0	0	1	7	0	1	0	0	0	0	0	0	0	0	1	0	0	0	0	0	0	1	0	0	0	0	0	0	0	0	0	0	0	0	0	0	0	0	0	0	0	0	1
	Wagneriana	dimastophora	1	0	0	0	0	0	1	0	0	3	2	0	0	0	0	0	1	0	1	4	1	0	0	0	0	0	0	0	0	0	0	0	0	0	0	0	0	0	0	0	0	0	0	1	0	0	0
		gavensis	2	5	0	1	0	0	0	0	0	0	0	0	1	0	0	1	0	0	0	0	0	0	0	0	0	0	0	0	0	0	0	0	0	0	0	0	0	0	0	0	0	0	1	0	0	0	0
Barychelidae	Neodiplothele	fluminensis	0	0	0	0	0	0	0	0	0	0	0	0	0	0	0	0	0	0	0	0	0	0	0	0	0	0	0	0	0	0	0	0	0	0	0	0	0	0	0	0	0	0	0	0	0	0	0
	Paracenobiobelma?	sp. 01	0	0	0	0	0	0	0	0	0	0	0	0	0	0	0	0	0	0	0	0	0	0	0	0	0	0	0	0	0	0	0	0	0	0	0	0	0	0	0	0	0	0	0	0	0	0	0
Caponiidae	Caponina	tijuca	0	0	0	0	0	0	0	0	0	0	0	0	0	0	0	0	0	0	0	0	0	0	0	0	0	0	0	0	0	0	0	0	0	0	0	0	0	0	0	0	0	0	0	0	0	0	0
	Nops	sp. n.	0	0	0	0	0	0	0	0	0	0	0	0	0	0	0	0	0	0	0	0	0	0	0	0	0	0	0	0	0	0	0	0	0	0	0	0	0	0	0	0	0	0	0	0	0	0	0
Clubionidae	Clubionidae	sp. 01 "corpo amarelo pálido uniforme, olhos pequenos"	0	0	0	0	1	0	0	0	0	0	0	0	0	0	0	0	0	0	0	0	0	0	0	2	3	0	0	0	0	0	0	0	0	0	0	0	0	0	0	0	0	0	0	0	0	0	0
Corinnidae	"Corinna"	inermis	0	0	0	0	0	0	0	0	0	0	0	0	0	0	0	0	0	0	0	0	0	0	0	0	0	0	0	0	0	0	0	0	0	0	0	0	0	0	0	0	0	0	0	0	0	0	0
	Castianeira	brevis	0	0	0	0	0	0	0	0	0	0	0	0	0	0	0	0	0	0	0	0	0	0	0	0	0	0	0	0	0	0	0	0	0	0	0	0	0	0	0	0	0	0	0	0	0	0	0
		sp. 01 "abdome oblongo, cefalotórax negro, com área posterior pálida nos jovens pequenos, abdome com metade anterior pálida e metade posterior negra, pernas com muitos artículos negros, mas coxas, trocanteres, tarsos e terço distal do dorso dos fêmures pálidos, tíbias, metatarsos e tarsos I-II com faixa lateral negra contínua, jovem bem pequeno com pernas todas brancas"	0	0	0	0	0	0	0	1	0	0	0	0	0	0	0	0	0	0	0	0	0	0	0	0	0	0	0	0	0	0	0	0	0	0	0	0	0	0	0	0	0	0	0	0	0	0	0
		sp. 02 "abdome bem longo, cefalotórax negro, abdome negro com 2 faixas transversais de pelos prateados, pernas com muitos artículos negros, mas coxas, trocanteres, tarsos e terço distal do dorso dos fêmures pálidos, tíbia e metatarso IV com anel negro terminal, artículos terminais da perna I todos brancos"	0	0	0	0	0	0	0	0	0	0	0	0	0	0	0	0	0	0	0	0	0	0	0	0	0	0	0	0	0	0	0	0	0	0	0	0	0	0	0	0	0	0	0	0	0	0	0
	Corinna	aff. capito	0	0	0	0	0	0	0	0	0	0	0	0	0	0	0	0	0	0	0	0	0	0	0	0	0	0	0	0	0	0	0	0	0	0	0	0	0	1	0	0	0	0	0	0	0	0	0
		aff. mourai	0	0	0	0	0	0	0	0	0	0	0	0	0	0	0	0	0	0	0	0	0	0	0	0	0	0	0	0	0	0	0	0	0	0	0	0	0	0	0	0	0	0	0	0	0	0	0
		nitens	0	0	0	0	0	0	0	0	0	0	0	0	0	0	0	0	0	0	0	0	0	0	0	0	0	0	0	0	0	0	0	0	0	0	1	0	0	0	0	0	0	0	0	0	0	0	0
		sp. 01 aff. ducke " corpo castanho-enegrecido, abdome longo, com 2 manchas triangulares claras grandes no terço inicial, pernas com artículos basais claros, faixas negras longitudinais nos fêmures I-III e e anel negro mediano no fêmur IV, artículos distais predominantemente negros, mas tarsos castanhos, esterno negro"	0	0	0	1	0	0	0	0	0	0	0	0	0	0	0	0	0	0	0	0	0	0	0	0	0	0	0	0	0	0	0	0	0	0	0	0	0	0	0	0	0	0	0	0	0	0	0
		sp. 02 " carapaça castanho-enegrecida, com pontos claros esparsos, abdome oblongo, castanho acinzentado, pernas amarelas, com faixas negras longitudinais em todos os artículos, exceto os tarsos amarelados, tíbia com 3 pares espinhos ventrais, esterno similar ao dorso do abdome"	0	0	0	0	0	0	0	0	0	0	0	0	0	0	0	0	0	1	0	0	0	0	0	0	0	0	0	0	0	0	0	0	0	0	0	0	0	0	0	0	0	0	0	0	0	0	0
		sp. 03 "carapaça larga, achatada, castanho-enegrecido, com faixas marginais castanho claras, abdome oblongo, violáceo e enegrecido, pernas amarelas, com faixas negras longitudinais nos fêmures e patelas e tíbias negras, esterno e ventre pálidos"	0	0	0	0	0	0	0	0	0	0	0	0	0	0	0	0	0	0	0	0	0	0	0	0	0	0	0	0	0	0	0	0	0	0	0	0	0	0	0	0	0	0	0	0	0	0	0
	Creugas	sp. 01 "F com epígino apresentando abertura mediana, M com ATR achatada, com um ramo interno longo e fino e o externo curvo em foice"	0	0	0	0	0	0	0	0	0	0	0	0	0	0	0	0	0	0	0	0	0	0	0	1	0	0	0	0	0	0	0	0	0	0	0	0	1	1	0	1	0	0	0	0	0	0	0
		sp. 02 "F com margem posterior do epígino projetada em ponta aguda, M com ATR larga, com metade apical excavada e com 2 projeções digitiformes apicais"	0	0	0	0	0	0	0	0	0	0	0	0	0	0	0	0	0	0	0	0	0	0	0	0	0	0	0	0	0	0	0	0	0	0	0	0	0	0	0	2	0	0	0	0	0	0	0
	Ianduba	varia	0	0	0	0	0	0	0	0	0	0	0	0	0	0	0	0	0	0	0	0	0	0	0	0	0	0	0	0	0	0	0	0	0	0	0	0	0	0	0	0	0	0	0	0	0	0	0
	Myrmecium	obscurum	0	0	0	0	0	0	0	0	0	2	0	0	0	0	0	0	0	0	0	0	0	0	0	0	0	0	0	0	0	0	0	0	0	0	0	0	0	0	0	0	0	0	0	0	0	0	0
		rufum	0	0	0	0	0	0	0	0	0	0	0	0	0	0	0	0	0	0	0	0	0	0	0	0	0	0	0	0	0	2	0	0	0	0	0	0	0	0	0	0	0	0	0	0	0	0	0
	Paradiestus	sp. 01 aff. giganteus	0	0	0	0	0	0	0	0	0	0	0	0	0	0	0	0	0	0	0	0	0	0	0	0	0	0	0	0	0	0	0	0	0	0	0	0	0	0	0	0	0	0	0	0	0	0	0
	Stethorrhagus	sp. n. aff. oxossi	0	0	0	0	0	0	0	0	0	0	0	0	0	0	0	0	0	0	0	0	0	0	0	0	0	0	0	0	0	0	0	0	0	0	0	0	0	0	0	0	0	0	0	0	0	0	0
	Trachelas	robustus	0	0	0	0	0	0	0	0	0	0	0	0	0	0	0	0	0	0	0	0	0	0	0	0	0	0	0	0	0	0	0	0	0	0	0	0	0	0	0	0	0	0	0	0	0	0	0
		vitiosus	0	0	0	0	0	0	0	0	0	0	0	0	0	2	0	0	0	0	0	0	0	0	0	0	0	0	0	0	0	0	0	0	0	0	0	0	0	0	0	0	0	0	0	0	0	0	0
	Tupirinna	sp. n.	0	0	0	0	0	0	0	1	0	0	0	0	0	1	0	0	0	0	0	0	0	0	0	0	0	0	0	0	1	0	1	0	0	0	0	0	0	0	0	0	0	0	0	0	0	0	0
	Xeropigo	sp. n.	0	0	0	0	0	0	0	0	0	0	0	0	0	0	0	0	0	0	0	0	0	0	0	0	0	0	0	0	0	0	0	0	0	0	0	0	0	0	0	0	0	0	0	0	0	0	0
Ctenidae	Ctenus	aff. vehemens	0	0	0	0	0	1	0	0	1	0	0	0	0	0	0	0	0	0	0	0	0	0	0	0	0	0	0	0	0	0	0	0	0	0	0	0	0	0	0	1	0	1	0	0	0	0	0
		medius	0	0	0	0	0	0	0	0	2	0	0	0	0	0	1	1	0	0	0	0	0	0	0	0	0	0	0	0	0	0	0	0	0	0	0	0	1	0	0	0	0	2	0	0	0	0	0
		ornatus	0	0	0	0	0	0	0	0	0	0	0	0	0	0	0	0	0	0	0	0	0	0	0	2	1	0	0	0	0	0	0	0	0	0	0	0	0	1	0	0	0	1	2	0	0	0	0
	Enoploctenus	cf. maculipes	0	0	0	0	0	0	0	0	0	0	0	0	0	0	0	0	2	0	0	0	0	0	0	1	0	0	0	0	0	0	0	0	0	0	0	0	1	0	1	1	0	0	0	0	0	0	0
		cyclothorax	0	0	0	0	0	0	0	0	0	0	1	0	0	0	0	1	0	0	0	0	0	0	0	1	0	0	0	0	0	0	0	0	0	0	0	0	0	0	0	0	0	0	0	0	0	0	0
	Isoctenus	griseolus	0	0	0	0	0	0	0	0	0	0	0	0	0	0	0	0	0	0	0	0	0	0	0	0	0	0	0	0	0	0	0	0	0	0	0	0	0	0	0	0	0	0	0	0	0	0	0
	Phoneutria	keyserlingi	0	0	0	0	0	0	0	0	0	0	0	0	0	0	0	0	0	0	0	0	0	0	0	0	0	0	0	0	0	0	0	0	0	0	0	0	0	0	0	0	0	0	0	0	0	0	0
Deinopidae	Deinopis	plurituberculata	0	0	0	0	0	0	0	0	0	0	0	0	0	0	0	0	0	0	0	0	0	0	0	0	0	0	0	0	0	0	0	0	0	0	1	0	0	0	0	0	0	0	0	0	0	0	0
Dipluridae	Linothele	gymnognatha	0	0	0	0	0	0	0	0	0	0	0	0	0	0	0	0	0	0	0	0	0	0	0	0	0	0	0	0	0	0	0	0	0	0	0	0	0	0	0	0	0	0	0	0	0	0	0
Gnaphosidae	Apodrassodes	sp. n. aff. mono	0	0	0	0	0	0	0	0	0	0	0	0	0	0	0	0	0	0	0	0	0	0	0	0	0	0	0	0	0	0	0	0	0	0	0	0	0	0	0	0	0	0	0	0	0	0	0
	Poecilochroa	cf. trifasciata	0	0	0	0	0	0	0	0	0	0	0	0	0	0	0	0	0	0	0	0	0	0	0	0	0	0	0	0	0	0	0	0	0	0	0	0	0	0	0	0	0	0	0	0	0	0	0
	Xenoplectus	sp. n.	0	0	0	0	0	0	0	0	0	0	0	0	0	0	0	0	0	0	0	0	0	0	0	0	0	0	0	0	0	0	0	0	0	0	0	0	0	0	0	0	0	0	0	0	0	0	0
	Zimiromus	sp. 01	0	0	0	0	0	0	0	0	0	0	0	0	0	0	0	0	0	0	0	0	0	0	0	0	0	0	0	0	0	0	0	0	0	0	0	0	0	0	0	0	0	0	0	0	0	0	0
Hahniidae	Hahnia	sp. 01	0	0	0	0	0	0	0	0	0	0	0	0	0	0	0	0	0	0	0	0	0	0	0	0	0	0	0	0	0	0	0	0	0	0	0	0	0	0	0	0	0	0	0	0	0	0	0
	Neohahnia	sp. 01	0	0	0	0	0	0	0	0	0	0	0	0	0	0	0	0	0	0	0	0	0	0	0	0	0	0	0	0	0	0	0	0	0	0	0	0	0	0	0	0	0	0	0	0	0	0	0
Hersiliidae	Ypypuera	crucifera	0	0	0	0	0	0	0	0	0	0	0	0	0	0	0	0	0	0	0	0	0	0	0	0	0	0	0	0	0	0	0	0	0	0	0	0	0	0	0	0	0	0	0	2	0	0	0
Idiopidae	Idiops	camelus	0	0	0	0	0	0	0	0	0	0	0	0	0	0	0	0	0	0	0	0	0	0	0	0	0	0	0	0	0	0	0	0	0	0	0	0	0	0	0	0	0	0	0	0	0	0	0
		germaini	0	0	0	0	0	0	0	0	0	0	0	0	0	0	0	0	0	0	0	0	0	0	0	0	0	0	0	0	0	0	0	0	0	0	0	0	0	0	0	0	0	0	0	0	0	0	0
Linyphiidae	Dubiaranea	cf. inquilina	0	0	0	0	0	0	0	0	0	0	0	0	0	0	0	0	0	0	0	0	0	0	0	0	0	0	0	0	0	0	0	0	0	0	0	0	0	0	0	0	0	0	0	0	0	0	0
	Erigone	autumnalis	0	0	0	0	0	0	0	0	0	0	0	0	0	0	0	0	0	0	0	0	0	0	0	0	0	1	0	0	0	0	0	0	0	0	0	0	0	0	0	0	0	0	0	0	0	0	0
	Erigoninae	sp. 01	0	0	0	0	0	0	0	0	1	0	0	0	0	0	0	0	0	0	0	0	0	0	0	0	0	0	0	0	0	0	0	0	0	0	0	0	0	0	0	0	0	0	0	0	0	0	0
		sp. 02 "similar a sp. 1, mas meno, com abdome mais curto e largo, dorso do abdome também com um par de manchas no terço posterior, mas com 2 faixas laterais descendo do terço anterior para o médio e unindo-se a um grande campo negro ventral antes das fiandeiras	0	0	0	0	0	0	0	0	0	0	0	0	0	0	0	0	0	0	0	0	0	0	0	0	0	0	0	0	0	0	0	0	0	0	0	0	0	0	0	0	0	0	0	0	0	0	0
	Gen. n. aff. Lomaita	sp. n. 02	0	0	0	0	0	0	0	0	0	0	0	0	0	0	0	0	0	0	0	0	0	0	0	0	0	0	2	0	0	0	0	0	0	0	0	0	0	1	0	0	0	0	0	0	0	0	0
	Laminacauda	sp. n. aff. amabilis	0	0	0	0	0	0	0	0	0	0	0	0	0	0	0	0	0	0	0	0	0	0	0	0	0	0	0	0	0	0	0	0	0	0	0	0	0	0	0	0	0	0	0	0	0	0	0
	Lygarina	sp. n. aff. caracasana	0	0	0	0	0	0	0	0	0	0	0	0	0	0	0	0	0	0	0	0	0	0	0	0	0	1	0	0	0	0	0	0	0	0	0	0	0	0	0	0	0	0	0	0	0	0	0
	Meioneta	aff. montivaga	0	0	0	0	0	0	0	0	0	0	0	0	0	0	0	0	0	0	0	0	0	0	0	0	0	0	0	0	0	0	0	0	0	0	0	0	0	0	0	0	0	0	0	0	0	0	0
		sp. n. aff. luctuosa	1	0	0	0	0	0	0	0	0	0	0	0	0	0	0	0	0	0	0	0	0	0	0	0	0	0	0	0	0	0	0	0	0	0	0	0	0	0	1	0	0	0	0	0	0	0	0
		sp. n. aff. straminicola	0	0	0	0	0	0	0	0	0	0	0	0	0	0	0	0	0	0	0	0	0	0	1	0	0	0	0	0	0	0	0	0	0	0	0	0	0	0	0	0	0	0	0	0	0	0	0
	Moyosi	sp. n. aff. rugosa	0	0	0	0	0	0	0	0	3	0	0	0	0	0	0	0	0	6	0	0	0	0	2	0	0	0	0	3	0	0	0	5	0	0	0	0	0	0	0	0	0	0	0	0	0	0	0
	Sphecozone	rubescens	0	0	0	0	0	0	0	0	0	0	0	0	0	0	0	0	0	0	0	0	0	0	0	0	0	0	0	0	0	0	0	0	0	0	0	0	0	0	0	0	0	0	0	0	0	0	0
		sp. n. aff. personata	0	0	0	0	0	0	0	0	0	0	0	0	0	0	0	0	0	0	0	0	0	0	0	0	0	0	0	0	0	0	0	0	0	0	0	0	0	0	0	0	0	0	0	0	0	0	0
	Vesicapalpus	simplex	0	1	0	0	1	0	0	0	1	0	0	0	0	0	0	0	0	0	0	0	0	0	3	1	0	0	1	5	0	0	0	0	0	0	0	0	0	0	5	2	0	0	0	0	0	0	0
Liocranidae	Liocranidae	sp. 01	0	0	0	0	0	0	0	0	1	0	0	0	0	0	0	0	0	1	0	0	0	0	0	0	0	0	0	0	0	0	0	0	0	0	0	0	0	0	0	0	0	0	0	0	0	0	0
Mimetidae	Gelanor	altithorax	0	0	0	0	0	0	0	0	0	0	0	0	0	1	0	0	0	0	0	0	0	0	0	0	0	0	0	0	0	0	0	0	0	0	0	0	0	0	0	0	0	0	0	0	0	0	0
		zonatus	0	0	0	0	0	0	0	0	0	0	0	0	0	0	0	0	0	0	0	0	1	0	0	0	0	0	0	0	0	0	0	0	1	0	0	0	0	0	0	0	0	0	0	0	0	0	0
	Mimetus	sp. 01 "abdome em losango, com dois tubérculos curtos nos ângulos, F com epígino similar a M. catharinae, com margem posterior do epígino truncada, M com palpo pequeno, tégulo discoidal, quase esférico, de comprimento similar ao do címbio, o qual não é modificado, ATR robusta alongada, com uma projeção basal grande e arredondada"	0	0	0	0	0	0	0	0	0	0	0	0	0	1	0	0	0	0	0	0	0	0	0	0	1	1	1	0	0	0	0	0	0	0	0	0	0	0	0	0	0	0	0	0	0	0	0
		sp. 02 "Maior, abdome pouco mais largo que longo, com dois tubérculos altos nos ângulos, epígino com crista alta mediana, palpo grande, com címbio modificado retrolateralmente, com sulco profundo e margem ventral espessada"	0	0	2	0	0	0	0	0	0	0	1	0	1	0	0	0	1	0	0	0	0	0	0	0	0	0	0	0	1	0	0	0	1	0	0	0	1	0	0	0	0	0	1	0	0	0	0
		sp. 03 "F com abdome muito mais largo que longo, com dois tubérculos altos nos ângulos, epígino similar a M. catharinae, com margem posterior do epígino formando projeção triangular e espermatecas convolutas finas, M com palpo pequeno, tégulo discoidal, quase esférico, de comprimento similar ao do címbio, o qual não é modificado, ATR pequena, curta, com uma projeção fina basal"	0	0	0	0	0	0	0	0	0	0	0	0	0	0	0	0	0	0	0	0	0	0	0	0	0	1	0	0	0	0	0	0	0	0	0	0	0	0	0	0	0	0	0	0	0	0	0
		sp. 04 "F com abdome mais largo que longo, com dois tubérculos altos distantes dos ângulos, epígino similar a M. catharinae, com margem posterior do epígino formando projeção triangular e com espermatecas convolutas grossas, M com palpo médio, tégulo discoidal, maior que o címbio, o qual não é modificado, apófise média grande, em vírgula voltada para baixo, ATR afinando regulamente até ponta um p…	0	0	0	0	0	0	0	0	0	0	0	0	0	0	0	0	0	0	0	0	0	0	0	0	0	0	0	0	0	0	0	0	0	0	0	0	0	0	0	0	0	0	0	0	0	0	0
		sp. 05 "carapaça com desenho castanho enegrecido, abdome esbranquiçado, com duas faixas negras laterais junto às fiandeiras, abdome alto e muito mais largo atrás, com dois tubérculos diminutos afastados das margens e com declive forte após tubérculos, epígino com margem posterior projetada em ponta romba e côncava no meio da margem posterior, espermatecas longas e largas em forma de saca-rolhas, …	0	0	0	0	0	0	0	0	0	0	0	0	0	0	0	0	0	0	0	0	0	0	0	0	0	0	0	0	0	0	0	0	0	0	0	0	0	0	0	0	0	0	0	0	0	0	0
Miturgidae	Radulphius	laticeps	0	0	0	0	0	0	0	0	0	0	0	0	0	0	0	0	0	0	0	0	0	0	0	0	0	0	0	0	0	0	0	0	0	0	0	0	0	0	0	0	0	0	0	0	0	0	0
		sp. n. aff. bicolor "carapaça castanho alaranjado, abdome amarelo pálido, coberto por cerdas enegrecidas, olhos grandes, ATR longa, com protuberância subterminal e ápice mais fino, êmbolo longo, circular, originando-se no meio do címbio"	0	0	0	0	1	0	0	0	0	0	0	0	0	0	0	0	0	0	0	0	0	0	0	0	0	0	0	0	0	0	0	0	0	0	0	0	0	0	0	0	0	0	0	1	0	0	0
	Strotarchus	tropicus	0	0	0	0	0	0	0	0	0	0	0	0	0	0	0	0	0	0	0	0	0	0	0	0	0	0	0	0	0	0	0	0	0	0	0	0	0	0	0	0	0	0	0	0	0	0	0
Mysmenidae	Maymena	sp. n.	0	0	0	0	2	0	0	0	0	0	0	0	0	0	0	0	0	0	0	0	0	0	0	0	0	0	0	0	0	0	0	0	0	0	0	0	0	0	0	0	0	0	0	0	0	0	0
	Mysmena	sp. 01	0	0	0	0	0	0	0	0	0	0	0	0	0	0	0	0	0	0	0	0	0	0	0	0	0	0	0	0	0	0	0	0	0	0	0	0	0	0	0	0	0	0	0	0	0	0	0
	Mysmenopsis	archeri	1	0	0	0	0	0	0	0	0	0	0	0	0	0	0	0	0	0	0	0	0	0	0	0	0	0	0	0	0	0	0	0	0	0	0	0	0	1	0	0	0	0	0	0	0	0	0
Nemesiidae	Chaco	sp. n. aff. melloleitaoi "grande, mais escura, rastelo fraco, sem cerdas rígidas diferenciadas, maxilas planas e não projetadas atrás, com cerca de 50 cúspulas, pernas com fêmures normais, longos, ventre salpicado com manchas escuras, M com tíbia I com megaespinho retrolateral, bulbo largo, subretangular, com êmbolo transversal e quilhas membranosas largas e côncavas, indo até o ápice do êmbolo"	0	0	0	0	0	0	0	0	0	0	0	0	0	0	0	0	0	0	0	0	0	0	0	0	0	0	0	0	0	0	0	0	0	0	0	0	0	0	0	0	0	0	0	0	0	0	0
	Gen. n. aff. Prorachias	sp. n. "carapaça glabra, maxilas curtas, com cotovelo posterior curto e largo e com cerca de 20 cúspulas, tarsos I-II dos M engrossados, tíbia do palpo curta e inflada, bulbo com êmbolo apresentando quilhas laterais em flap de cada lado	0	0	0	0	0	0	0	0	0	0	0	0	0	0	0	0	0	0	0	0	0	0	0	0	0	0	0	0	0	0	0	0	0	0	0	0	0	0	0	0	0	0	0	0	0	0	0
	Prorachias	sp. n. aff. bristowei "carapaça hirsuta, maxilas longas, com cotovelo posterior longo e triangular e sem cúspulas, tarsos dos M flexuosos finos, tíbia do palpo longa e inflada, bulbo com êmbolo simples e quilhas rudimentares	0	0	0	0	0	0	0	0	0	0	0	0	0	0	0	0	0	0	0	0	0	0	0	0	0	0	0	0	0	0	0	0	0	0	0	0	0	0	0	0	0	0	0	0	0	0	0
	Rachias	conspersus	0	0	0	0	0	0	0	0	0	0	0	0	0	0	0	0	0	0	0	0	0	0	0	0	0	0	0	0	0	0	0	0	0	0	0	0	0	0	0	0	0	0	0	0	0	0	0
		sp. n. aff. dispar "Rio"	0	0	0	0	0	0	0	0	0	0	0	0	0	0	0	0	0	0	0	0	0	0	0	0	0	0	0	0	0	0	0	0	0	0	0	0	0	0	0	0	0	0	0	0	0	0	0
	Stenoterommata	melloleitaoi	0	0	0	0	0	0	0	0	0	0	0	0	0	0	0	0	0	0	0	0	0	0	1	0	0	0	0	0	0	0	0	0	0	0	0	0	0	0	0	0	0	0	0	0	0	0	0
		sp. 02 "pequena, mais clara, ventre unicolor, rastelo quase inexistente, maxilas planas e não projetadas atrás, com cerca de 30 cúspulas, pernas com fêmures normais, longos, M com tíbia do palpo curta, sem protuberância e espinhos prolaterais, címbio piriforme, com quilhas fracas, inconspícuas, êmbolo curto, transversal, e com ponta triangular curtal"	0	0	0	0	0	0	0	0	0	0	0	0	0	0	0	0	0	0	0	0	0	0	0	0	0	0	0	1	0	0	0	0	0	0	0	0	0	0	0	0	0	0	0	0	0	0	0
		sp. 03 "pequena, mais clara, rastelo fraco, com algumas cerdas rígidas, maxilas planas e não projetadas atrás, com cerca de 30 cúspulas, pernas com fêmures normais, longos, M com tíbia do palpo curta, sem protuberância e espinhos prolaterais, címbio cônico, com quilhas abundantes e conspícuas, projetadas apicalmente, deslocando o êmbolo curvo e fino para uma posição aparentemente subapical"	0	0	0	0	0	0	0	0	0	0	0	0	0	0	0	0	0	0	0	0	0	0	0	0	0	0	0	0	0	0	0	0	0	0	0	0	0	0	0	0	0	0	0	0	0	0	0
Nephilidae	Nephila	clavipes	0	0	0	0	0	0	0	0	0	1	1	0	0	0	0	0	1	0	0	2	0	0	0	0	0	0	2	0	1	0	0	0	0	3	1	0	0	0	0	0	1	0	0	0	0	0	0
Ochyroceratidae	Ochyrocera	sp. n. 01 "pequeno, carapaça amarelada com 3 faixas azuis enegrecidas, abdome oblongo azul pálido, M com procurso pequeno e pontiagudo e êmbolo muito longo, tubular e curvo"	0	0	0	0	0	0	0	0	0	0	0	0	0	0	0	0	0	0	0	0	0	0	0	0	0	0	0	0	0	0	0	0	0	0	0	0	0	0	0	0	0	0	0	0	0	0	0
		sp. n. 02 "medio, carapaça azul escuro, com apenas a área central pálida, abdome longo, tubular, azul escuro, moqueado de azul claro no dorso, M com címbio apresentando 2 espinhos na origem do procurso, o qual é grande e pontiagudo, êmbolo de tamanho médio, um pouco curvo, afinando regularmente para o ápice"	0	0	0	0	0	0	0	0	0	0	0	0	0	0	0	0	0	0	0	0	0	0	0	0	0	0	0	0	0	0	0	0	0	0	0	0	0	0	0	0	0	0	0	0	0	0	0
	Theotima	minutissima	0	0	0	0	0	0	0	0	2	0	0	0	0	0	0	0	0	5	0	0	0	0	0	0	0	0	0	3	0	0	0	2	0	0	0	0	0	0	0	0	0	0	0	0	0	0	0
Oonopidae	Brignolia	sp. n. "palpo e enditos similares ao de B. parumpunctata, mas corpo mais longo, com escudos mais longos e finos e esterno com cerdas modificadas no centro"	0	0	0	0	0	0	0	0	0	0	0	0	0	0	0	0	0	0	0	0	0	0	0	0	0	0	0	0	0	0	0	0	0	0	0	0	0	0	0	0	0	0	0	0	0	0	0
	Gamasomorphinae	sp. 01 "cefalotórax alto, com área cefálica alongada e área torácica curta, em declive agudo, abdome com grandes escudos dorsal e ventral arredondados, genitália transparecendo como massa negra pequena, sob pequeno esclerito triangular após sulco, internamente ladeado por 2 feixes escuros longitudinais dirigindo-se para trás, M com bulbo não completamente separado do címbio, êmbolo reto, em forma…	0	0	0	0	0	0	0	0	0	0	0	0	0	0	0	0	0	1	0	0	0	0	0	0	0	0	0	0	0	0	0	3	0	0	0	0	0	0	0	0	0	0	0	0	0	0	0
		sp. 02 "cefalotórax baixo, com muitos pits nas laterais, área cefálica alongada e área torácica curta, em declive, abdome largo, com grandes escudos dorsal e ventral arredondados, 2 manchas negras transparecendo sob escudo ventral pouco antes das fiandeiras genitália pouco visível, esclerito alongado e estreito após sulco"	0	0	0	0	0	0	0	0	0	0	0	0	0	0	0	0	0	0	0	0	0	0	0	0	0	0	0	0	0	0	0	0	0	0	0	0	0	0	0	0	0	0	0	0	0	0	0
	Neotrops	sp. n. 01 "carapaça amarelo-pálido, abdome cinza claro, com tons azulados ás vezes, olhos grandes, fêmur I com 2 espinhos prolaterais, tíbia I com 5 pares de espinhos, fêmur IV bem engrossado, M com palpo alongado, cônico, com êmbolo relativamente grosso e esclerito semicircular grande e com esclerito adicional pouco esclerotizado acima do êmbolo	0	0	0	0	0	1	0	0	0	1	0	0	0	1	0	0	0	0	0	0	0	0	0	0	0	0	0	0	0	0	0	0	0	0	0	0	0	0	0	0	0	0	0	0	0	0	0
		sp. n. 02 "carapaça amarelada, abdome amarelo-pálido, olhos bem grandes, fêmur I com 2 espinhos prolaterais, tíbia I com 5 pares de espinhos, fêmur IV bem engrossado, M com palpo alongado, cônico, com êmbolo relativamente fino e esclerito semicircular de tamanho mediano, sem esclerito adicional"	0	0	0	1	0	0	0	0	0	0	0	0	0	0	0	0	0	0	0	0	0	0	0	0	0	0	0	0	0	0	0	0	0	0	0	0	0	0	0	0	0	0	0	0	0	0	0
		sp. n. 04 "carapaça muito alaranjada, abdome amarelo-pálido, olhos bem grandes, perna I ausente, fêmur IV engrossado, M com palpo alongado, cônico, similar aos das sp. 1 & 2,com êmbolo semicircular relativamente pequeno e de comprimento similar ao do esclerito ventral, cujo ápice é achatado e alargado, como um véu"	0	0	0	0	0	0	0	0	0	0	0	0	0	0	0	0	0	2	0	0	0	0	0	0	0	0	0	0	0	0	0	0	0	0	0	0	0	0	0	0	0	0	0	0	0	0	0
	Neoxyphinus	keyserlingi	0	0	0	0	0	0	0	0	1	0	0	0	0	0	0	0	0	0	0	0	0	0	0	0	0	0	0	0	0	0	0	1	0	0	0	0	0	0	0	0	0	0	0	0	0	0	0
	Oonopinae	sp. 03 "carapaça alaranjada, abdome amarelo-pálido, olhos bem grandes, fêmur I com 3 espinhos prolaterais, tíbia I com 5 pares de espinhos, fêmur IV engrossado, F com vulva simples, aparecendo como um ponto mais escuro na margem posterior, acima do qual existe uma fileira marginal de cerdas, M com área cefálica modificada, com sulcos escuros profundos delimitando-a, quelícera modificada com escle…	0	0	0	0	0	0	0	0	0	0	0	0	0	0	0	0	0	1	0	0	0	0	0	0	0	0	0	0	0	0	0	3	0	0	0	0	0	0	0	0	0	0	0	0	0	0	0
		sp. 05 "carapaça alaranjada, abdome amarelo-pálido, olhos bem grandes, fêmur I mútico, tíbia I com 3 pares de espinhos fracos, fêmur IV engrossado, F com área genital opaca, vulva não visível, margem do sulco epigástrico um pouco escavada no meio	0	0	0	0	0	0	0	0	0	0	0	0	0	0	0	0	0	0	0	0	0	0	0	0	0	0	0	0	0	0	0	0	0	0	0	0	0	0	0	0	0	0	0	0	0	0	0
		sp. 06 "carapaça amarelada, abdome amarelo-pálido, olhos grandes, com OMP elípticos, alongados, fêmur I com 3 espinhos prolaterais, tíbia I com 5 pares de espinhos, fêmur IV engrossado	0	0	0	0	0	0	0	0	0	0	0	0	0	0	0	0	0	0	0	0	0	0	0	0	0	0	0	0	0	0	0	0	0	0	0	0	0	0	0	0	0	0	0	0	0	0	0
		sp. 07 "carapaça amarelada, abdome cinzento, olhos bem grandes, fêmur I com 2 espinhos prolaterais, tíbia I com 5 pares de espinhos fortes, fêmur IV engrossado, F com margem do sulco epigástrico muito escavada no meio, recuando bastante, genitália interna com T alongado pouco visível	0	0	0	0	0	0	0	0	0	0	0	0	0	0	0	0	0	0	0	0	0	0	0	0	0	0	0	0	0	0	1	0	0	0	0	0	0	0	0	0	0	0	0	0	0	0	0
	Orchestina	sp. 01	0	0	0	0	0	0	0	0	0	0	0	0	0	0	0	0	0	0	0	0	0	0	0	0	0	0	0	0	0	0	0	0	0	0	0	0	0	0	0	0	0	0	0	0	0	0	0
	Triaeris	stenaspis	0	0	0	0	0	1	0	0	0	0	0	0	0	0	0	0	0	2	0	0	0	0	0	0	0	0	0	0	0	0	0	0	0	0	0	0	0	0	0	0	0	0	0	0	0	0	0
Oxyopidae	Oxyopes	cf. rubrosignatus	0	0	0	0	0	0	0	0	0	0	0	0	0	0	0	0	0	0	0	0	0	0	0	0	0	0	0	0	0	0	0	0	0	0	0	0	0	0	0	0	0	0	0	0	0	0	0
	Schaenicoscelis	concolor	0	0	0	0	0	0	0	0	0	0	0	0	0	0	0	0	0	0	0	0	0	0	0	0	0	0	0	0	0	0	0	0	0	0	0	0	0	0	0	0	0	0	0	0	0	0	0
Palpimanidae	Fernandezina	tijuca	0	0	0	0	0	0	0	0	0	0	0	0	0	0	0	0	0	1	0	0	0	0	0	0	0	0	0	0	0	0	0	1	0	0	0	0	0	0	0	0	0	0	0	0	0	0	0
	Otiothops	sp. n. aff. hoeferi "êmbolo com ápice curvado em uma pequena projeção que afina rapidamente para o ápice"	0	0	0	0	0	0	0	0	0	0	0	0	0	0	0	0	0	0	0	0	0	0	0	0	0	0	0	0	0	0	0	0	0	0	0	0	0	0	0	0	0	0	0	0	0	0	0
Philodromidae	Berlandiella	cf. insignis	0	0	0	0	0	0	0	0	0	0	0	0	0	0	0	0	0	0	0	0	0	0	0	0	0	0	0	0	0	0	0	0	0	0	0	0	0	0	0	0	0	0	0	0	0	0	0
Pholcidae	Carapoia	sp. n. 02 "corpo bem menor, M com procurso pouco curvo e apófise da quelícera com muitas cerdas"	0	0	0	0	0	0	0	0	0	0	0	0	0	0	0	0	0	0	0	0	0	0	0	0	0	0	0	0	0	0	0	0	0	0	0	0	0	0	0	0	0	0	0	0	0	0	0
		sp. n. aff. ubatuba	2	0	0	0	0	6	0	0	0	0	0	4	4	0	5	1	1	0	0	0	0	0	0	2	7	0	0	0	0	0	0	0	0	0	0	0	0	5	0	1	3	3	8	0	0	0	0
	Litoporus	iguassuensis	0	0	0	0	0	0	0	0	0	0	0	0	0	0	0	0	0	0	0	0	0	0	0	0	0	0	0	0	0	0	0	0	0	0	0	0	0	0	0	0	0	0	0	0	0	0	0
	Mesabolivar	brasiliensis	0	0	0	0	0	0	0	0	0	0	0	0	0	0	0	1	0	0	0	0	0	0	0	0	0	0	0	0	0	0	0	0	0	0	0	0	0	0	0	0	0	0	0	0	0	0	0
		cyaneotaeniatus	0	5	1	2	0	0	0	0	0	3	1	0	0	1	0	2	2	0	1	2	6	0	0	0	0	0	4	0	0	3	0	0	0	3	2	0	0	0	1	0	4	1	1	1	5	5	0
		difficilis	0	0	0	0	2	1	0	0	1	0	0	1	0	0	0	0	0	1	0	0	0	0	0	0	0	0	0	0	0	0	0	0	0	0	0	0	0	1	2	0	0	0	0	0	0	0	0
		luteus	2	2	0	4	0	0	21	16	0	13	34	0	0	24	2	10	2	0	9	27	8	34	0	0	1	7	1	0	6	26	16	0	4	12	18	0	11	3	0	0	9	2	1	24	12	31	0
		sp. n. "Marapendi"	0	0	0	0	0	0	0	0	1	0	0	1	0	0	0	0	0	0	0	0	0	0	0	0	0	0	0	0	0	0	0	0	0	0	0	0	0	0	0	0	0	0	0	0	0	0	0
		sp. n. aff. argentinensis	0	0	0	0	0	0	0	0	0	0	0	0	0	0	0	0	0	0	0	0	0	0	0	0	0	0	0	0	0	0	0	0	0	0	0	0	0	0	0	0	0	0	0	0	0	0	0
		sp. n. aff. cyaneomaculatus	0	0	0	0	0	0	0	0	0	0	0	0	0	0	0	0	0	0	0	0	0	0	0	0	3	0	0	0	0	0	0	0	0	0	0	0	0	0	1	0	0	0	0	0	0	0	0
		togatus	17	1	8	0	19	9	1	0	0	0	0	2	7	0	13	3	13	0	0	0	1	0	0	3	0	0	5	0	0	0	0	0	0	0	0	0	4	10	6	6	1	23	7	0	0	1	0
	Metagonia	furcata	0	0	0	0	0	0	0	0	0	0	0	0	0	0	0	0	0	0	0	0	0	0	0	0	0	0	0	0	0	0	0	0	0	0	0	0	0	0	0	0	0	0	0	0	0	0	0
		sp. n. aff. beni	0	0	0	0	0	0	5	0	0	0	2	0	0	0	1	0	0	0	0	0	0	11	0	0	0	0	0	0	0	0	0	0	0	0	0	0	0	0	0	0	0	0	0	0	0	0	0
		sp. n. aff. bicornis	0	0	0	0	0	0	0	0	0	0	0	0	0	0	0	0	0	0	0	0	0	0	0	0	0	0	0	0	0	0	0	0	0	0	1	0	0	0	0	0	0	0	0	0	0	0	0
		sp. n. aff. nadleri	0	0	0	1	0	0	2	1	0	5	0	0	0	2	0	4	3	0	0	4	0	3	0	0	0	0	1	0	0	0	2	0	1	2	2	0	1	0	0	0	11	3	2	4	2	2	0
		sp. n. aff. petropolis 3	0	0	0	0	0	0	0	0	0	0	0	0	0	0	0	0	0	0	0	0	0	0	0	0	0	0	0	0	0	0	0	0	0	0	0	0	0	0	0	0	0	0	0	0	0	0	0
	Tupigea	sp. n. 01 "F com faixa enegrecida larga em toda parte cefálica, clípeo negro na F e com apenas faixa estreita no M, quelíceras negras, pernas curtas, com anéis negros na F e pernas longs, com anéis pequenos, quase indistintos no M"	0	0	0	0	0	0	0	1	2	0	0	0	0	0	0	0	0	0	0	0	0	0	0	0	0	0	0	0	0	0	0	0	0	0	0	0	0	0	1	0	0	0	0	0	0	0	0
Pisauridae	Architis	brasiliensis	0	0	0	0	0	0	0	0	0	0	0	0	0	0	0	0	0	0	0	0	0	0	0	0	0	0	0	0	0	0	0	0	0	0	0	0	0	0	0	0	0	0	0	0	0	0	0
Prodidomidae	Lygromma	sp. n. 02	0	0	0	0	0	0	0	0	0	0	0	0	0	0	0	0	0	0	0	0	0	0	0	0	0	0	0	0	0	0	0	0	0	0	0	0	0	0	0	0	0	0	0	0	0	0	0
Salticidae	"Neonella"	sp. 01	0	0	0	0	0	0	0	0	0	0	0	0	0	0	0	0	0	0	0	0	0	0	0	0	0	0	0	0	0	0	0	0	0	0	0	0	0	0	0	0	0	0	0	0	0	0	0
	Acragas	sp. n. aff. trimaculatus	0	0	0	0	0	0	0	0	0	0	0	0	0	0	0	0	0	0	0	0	0	0	0	0	0	0	0	0	0	0	0	0	0	0	0	0	0	0	0	0	0	0	0	0	0	0	0
	Arnoliseus	sp. n. aff. calcarifer	0	0	0	0	0	0	0	0	0	0	0	0	0	0	0	0	0	0	0	0	0	0	0	0	0	0	1	0	0	0	0	0	0	0	0	0	0	0	0	0	0	0	0	0	0	0	0
		sp. n. aff. graciosa	0	0	0	4	0	0	0	1	0	0	0	0	0	0	0	0	0	0	0	0	0	0	0	0	0	0	0	0	0	0	0	0	0	0	0	0	0	0	0	0	0	0	0	0	0	0	0
	Breda	cf. milvina	0	0	0	0	0	0	0	0	0	0	0	0	0	0	0	0	0	0	0	0	0	0	0	0	0	0	0	0	0	0	0	0	0	0	0	0	0	0	0	0	0	0	0	0	0	0	0
	Chira	lucina	0	0	0	0	0	0	0	0	0	0	0	0	0	0	0	0	0	0	0	0	0	0	0	0	0	0	0	0	0	0	0	0	0	0	0	0	0	0	0	0	0	0	0	1	0	0	0
		thysbe	0	0	0	0	0	0	0	0	0	0	0	0	0	0	0	0	0	0	0	0	0	0	0	0	0	0	0	0	0	0	0	0	0	0	0	0	0	0	0	0	0	0	0	0	0	0	0
	Chirothecia	aff. semiornata	0	0	0	0	0	0	0	0	0	0	0	0	0	0	0	0	0	0	0	0	0	0	0	0	0	0	0	0	0	0	0	0	0	0	0	0	0	0	0	0	0	0	0	0	0	0	0
	Coryphasia	aff. albibarbis "Pedra Branca"	0	0	0	0	0	0	0	0	0	0	0	0	0	0	0	0	0	0	0	0	0	0	0	0	0	0	0	0	0	1	0	0	0	0	0	0	1	0	0	0	0	0	0	0	0	0	0
		albibarbis	0	0	0	5	0	0	0	2	0	0	1	0	0	5	0	0	0	0	1	0	0	0	0	0	0	4	0	0	0	1	2	0	0	0	0	0	0	0	1	0	0	0	0	0	1	0	0
	Corythalia	sp. 01	0	0	0	0	0	0	0	0	0	0	0	0	0	0	0	0	0	0	0	0	0	0	0	0	0	1	0	0	0	0	0	0	1	0	0	0	0	0	0	0	0	0	0	0	0	0	0
	Cotinusa	magna	0	0	0	0	0	0	0	0	0	0	0	0	0	1	0	0	0	0	0	0	0	0	1	0	0	1	1	0	1	0	1	0	0	0	0	0	0	0	0	0	0	0	0	0	0	0	0
	Cylistella	cuprea	0	0	0	0	0	0	0	1	0	0	0	0	0	0	0	0	0	0	0	0	0	0	0	0	0	0	0	0	0	0	0	0	0	0	0	0	0	0	0	0	0	0	0	0	0	0	0
	Encolpius	guaraniticus	0	0	0	0	0	0	0	0	0	0	0	0	0	0	0	0	0	0	0	0	0	0	0	0	0	0	0	0	0	0	0	0	0	0	0	0	0	0	0	0	0	0	0	0	0	0	0
	Erica	eugenia	0	0	0	0	0	0	0	3	0	0	0	0	0	0	0	0	0	0	0	0	0	0	0	0	0	0	0	0	0	1	1	0	0	0	0	0	0	0	0	0	0	0	0	0	0	0	0
	Euophryinae	sp. 02	0	0	0	0	0	0	0	0	0	0	0	0	0	0	0	0	0	0	0	0	0	0	0	0	0	0	0	0	0	0	0	0	0	0	1	0	0	0	0	0	0	0	0	0	1	0	0
	Freya	aff. chapare	0	0	0	0	0	0	0	0	0	0	0	0	0	0	0	0	0	0	0	0	0	0	0	0	0	0	0	0	0	0	0	0	0	0	0	0	0	0	0	0	0	0	0	0	0	0	0
	Itata	sp. n. aff. tipuloides	0	0	0	0	0	0	1	0	0	0	0	0	0	0	0	0	0	0	0	0	0	0	0	0	0	0	0	0	0	0	0	0	0	1	0	0	0	0	0	0	0	0	0	0	1	0	0
	Lyssomanes	austerus	0	0	0	0	0	0	0	0	0	0	0	0	0	1	0	0	0	0	0	0	0	0	0	0	0	0	0	0	0	0	0	0	0	0	0	0	0	0	0	0	0	0	0	0	0	0	1
	Mago	aff. longidens	0	0	0	0	0	0	0	0	0	0	0	0	0	0	0	0	0	0	0	0	0	0	0	0	0	0	0	0	0	0	0	0	0	0	0	0	0	0	0	0	0	0	0	0	0	0	0
	Mopiopia	sp. 01 aff. tristis "carapaça marrom escura, com área cefálica mais clara, pernas e abdome amarelo claro, dorso deste com duas faixas irregulares cinza enegrecido, fiandeiras anteriores e mediana negras e posteriores amarelo claro, êmbolo com uma base alta da qual sai a espiral final, a qual situa-se em ângulo de 90 graus com o eixo do bulbo"	0	0	0	0	0	0	0	0	0	0	0	0	0	0	0	0	0	0	0	0	0	0	0	0	0	0	0	0	0	0	0	0	0	0	0	0	0	0	0	0	0	0	0	0	0	0	0
	Noegus	bidens	0	0	0	0	0	0	0	0	0	0	0	0	0	1	0	0	0	0	0	0	0	0	0	0	0	0	0	0	0	0	0	0	0	0	1	0	0	0	0	0	0	0	0	0	0	0	0
		comatulus	0	0	0	2	0	0	0	9	0	0	0	0	0	0	0	0	0	0	0	2	0	1	0	0	0	3	0	0	1	0	0	0	1	0	1	0	2	1	0	0	0	0	0	1	0	1	1
	Phiale	mimica	0	0	0	1	0	0	0	0	0	0	0	0	0	0	0	0	0	0	0	0	0	0	0	0	0	0	0	0	0	0	0	0	0	0	0	0	0	0	0	0	0	0	0	0	0	0	0
	Pseudofluda	cf. pulcherrima	0	0	0	0	0	0	0	0	0	0	0	0	0	0	0	0	0	0	0	0	0	0	0	0	0	0	0	0	0	0	0	0	0	0	0	0	0	0	0	0	0	0	0	0	0	0	0
	Romitia?	sp. 01	0	0	0	0	0	0	0	0	0	0	0	0	0	0	0	0	0	0	0	0	0	0	0	0	0	0	0	0	0	0	0	0	0	0	0	0	0	0	0	0	0	0	0	0	0	0	0
	Salticidae	sp. 01 "corpo grande, pálido, área ocular castanha, F com restante da carapaça pálida e M com maior parte castanho escuro, abdome com 2 faixas longitudinais laterais irregulares acinzentadas e pouco visíveis às vezes	0	0	0	0	0	0	0	2	0	0	0	0	0	0	0	0	0	0	1	0	0	0	0	0	0	0	0	0	0	0	1	0	0	0	0	0	0	0	0	0	0	0	0	0	0	0	0
		sp. 02 "similar a sp. 6, mas menor, corpo um pouco achatado, área cefálica negra, área torácica castanha, abdome um pouco alongado, castanho acinzentado, epígino com 2 espermatecas grandes, arredondadas, posteriores, 2 aberturas laterais anteriores e dutos curvos, medianos, bem visíveis"	0	0	0	0	0	0	0	0	0	0	0	0	0	0	0	0	0	0	0	0	0	0	0	0	0	0	0	0	0	0	0	0	0	0	0	0	0	0	0	0	0	0	0	0	0	0	0
		sp. 03 "corpo curto, carapaça e abdome cinza enegrecidos, com duas estrias claras formando um V no declive, abdome com 2 linhas longitudinais claras	0	0	0	0	0	0	0	0	0	0	0	0	0	0	0	0	0	0	0	0	0	0	0	0	0	0	0	0	0	0	0	0	0	0	0	0	0	0	0	0	0	0	0	0	0	0	0
		sp. 04 "corpo curto, carapaça castanho enegrecido, esterno enegrecido, abdome com dorso negro, cuja área mediana é variável, variando de negro, com apenas estrias finas brancas em V, até uma faixa branca larga, crenulada no dorso, recortada inicialmente pelo fólio negro, ventre com faixa negra variável junto às fiandeiras, pernas amarelas uniformes, F com epígino apresentando 2 fóveas grandes, se…	0	0	0	0	0	0	0	0	0	0	0	0	0	0	0	0	0	0	0	0	0	0	0	0	0	0	0	0	0	0	0	0	0	0	0	0	0	0	0	0	0	0	0	0	0	0	0
		sp. 05 "carapaça negra na área cefálica, castanho enegrecido na torácica, abdome negro, com uma faixa branca transversal na margem anterior, outra mediana, com uma área central triangular, em volta de uma pequena mancha negra, e 2 outras pequenas atrás, F com pernas amarelas, com fêmures negros e anel negro basal na tíbia, M com pernas negras e tarso amarelado"	0	0	0	0	0	0	0	0	0	0	0	0	0	0	3	0	0	0	0	0	0	0	0	0	0	0	0	0	0	0	0	0	0	0	0	0	0	0	0	0	0	0	0	0	0	0	0
		sp. 06 "similar a sp. 2, corpo um pouco achatado, área cefálica negra, área torácica castanha, abdome um pouco alongado, castanho acinzentado, epígino com 2 espermatecas grandes, arredondadas, posteriores, 2 aberturas medianas anteriores e dutos não visíveis, M com escudo grande dorsal, palpo com ATR grande, excavada, afinando para a ponta, êmbolo não visível, mas tégulo espessado e projetando-se…	0	0	0	0	0	0	0	0	0	0	0	0	0	0	0	0	0	0	0	0	0	0	0	0	0	0	0	0	0	0	0	0	0	0	0	0	0	0	0	0	0	0	0	0	0	0	0
		sp. 07 "similar sp. 4, corpo curto, carapaça negra, com área triangular após a fóvea creme, um par de tufos de cerdas brancas nas laterais da região ocular, esterno amarelo, abdome com dorso negro, com um par de manchas brancas anteriores e um par de faixas brancas inclinadas posteriores, ventre amarelo-pálido, pernas amarelas uniformes, F com epígino triangular alongado, aberturas bem anteriores…	0	0	0	0	0	0	0	0	0	0	0	0	0	0	0	0	0	0	0	0	0	0	0	0	0	0	0	0	0	0	0	0	0	0	0	0	0	0	0	0	0	0	0	0	0	0	0
		sp. 08 "corpo curto, carapaça pálida, com área ocular negra e 2 faixas transversais enegrecidas após fóvea, abdome com dorso cinzento, com um par de faixas brancas em torno de fólio cinza escuro no terço anterior, seguidas por 3 a 4 pares de manchas claras em V invertido interrompido no meio, esterno e ventre amarelo-pálidos, pernas amareladas, com patelas apresentando margem distal enegrecida, F…	0	0	0	0	0	0	0	0	0	0	0	0	0	0	0	0	0	1	0	0	0	0	0	0	0	0	0	0	0	0	0	1	0	0	0	0	0	0	0	0	0	0	0	0	0	0	0
		sp. 09 "similar sp. 4, corpo curto, carapaça castanho enegrecido, com 2 faixas transversais prateadas, esterno enegrecido, abdome com dorso negro, com 2 faixas brancas transversais, uma na margem anterior e outra no início do terço posterior, entre elas há 2 manchas redondas brancas e atrás da última faixa, que é interrompida no meio, uma mancha alongada branca, ventre com faixa negra junto às fi…	0	0	0	0	0	0	0	0	0	0	0	0	0	0	0	0	0	0	0	0	0	0	0	0	0	0	0	0	0	0	0	0	0	0	0	0	0	0	0	0	0	0	0	0	0	0	0
		sp. 10 "corpo curto, carapaça marrom escura, com área ocular negra, revestido por cerdas plumosas brancas, abdome arroxeado, com área cinzenta mediana, 1 faixa branca em toda a margem anterior e 2 pequenas faixas brancas diagonais no terço posterior prateadas, esterno castanho-enegrecido, abdome com ventre enegrecido, F com epígino pequeno, apresentando 2 fóveas grandes, semicirculares, na área p…	0	0	0	0	0	0	0	0	0	0	0	0	0	0	0	0	0	0	0	0	0	0	0	0	0	0	0	0	0	0	0	0	0	0	0	0	0	0	0	0	0	0	0	0	0	0	0
		sp. 11 "carapaça marrom enegrecida, com área ocular com pigmento negro mais abundante, área da fóvea e faixa mediana no declive amarelo pálido, pernas amarelo pálido, com anéis castanhos finos e pouco marcados, abdome com dorso amarelo pálido, com laterais apresentando faixas enegrecidas irregulares, ventre amarelo-pálido, F com epígino esclerotizado, apresentando uma fóvea anterior, antecedida p…	0	0	0	0	0	0	0	0	0	0	0	0	0	0	0	0	0	0	0	0	0	0	0	0	0	0	0	0	0	0	0	0	0	0	0	0	0	0	0	0	0	0	0	0	0	0	0
		sp. 12 "carapaça negra, recoberta por abundantes cerdas brancas, pernas castanhas, trocânteres e fêmures pálidos, anéis enegrecidos distais, perna I com Fêmur e tíbia engrossados, abdome com dorso mais quitinizado e amarronzado, cor geral do dorso pálida, com abundante pigmento negro, formando 4 a 5 chevrons do meio para trás, esterno e ventre enegrecidos, M com ATR grande e larga, arredondada no…	0	0	0	0	0	0	0	0	0	0	0	0	0	0	0	0	0	0	0	0	0	0	0	0	0	0	0	0	0	0	0	0	0	0	0	0	0	0	0	0	0	0	0	0	0	0	0
	Semnolius	sp. 02	0	0	0	0	0	0	0	0	0	0	0	0	0	0	1	0	0	0	0	0	0	0	0	0	0	0	0	0	0	0	0	0	0	0	0	0	0	0	0	0	0	0	0	0	0	0	0
		sp. n. aff. chrysotrichus	0	0	0	0	0	0	0	0	0	0	0	0	0	0	0	0	0	0	0	0	0	0	0	0	0	0	0	0	0	0	0	0	0	0	0	0	0	0	0	0	0	0	0	0	0	0	0
	Tariona	aff. mutica	0	0	0	1	0	0	0	1	0	0	0	0	0	0	0	0	0	0	0	0	0	0	0	0	0	1	0	0	0	0	1	0	1	0	0	0	0	0	0	0	0	0	0	0	0	0	1
		bruneti	0	0	0	0	0	0	0	0	0	0	0	0	0	0	0	0	0	0	0	0	0	0	0	0	0	0	0	0	0	0	0	0	0	0	0	0	0	0	0	0	0	0	0	0	0	0	1
		gounellei	0	0	0	0	0	0	0	0	0	0	0	0	0	0	0	0	0	0	0	0	0	0	0	0	0	2	0	0	0	0	0	0	0	0	1	0	0	0	0	0	0	0	0	0	0	0	0
	Thiodina	sp. n. 01 seg. Pires, 2003	0	0	0	0	0	0	0	0	0	0	0	0	0	0	0	0	0	0	0	0	0	0	0	0	0	1	0	0	0	0	0	0	0	0	0	0	0	0	0	0	0	0	0	0	0	0	0
	Vinnius	uncatus	0	0	0	0	0	0	0	0	0	0	0	0	0	0	0	0	0	0	0	0	0	0	0	0	0	0	0	0	0	0	0	0	0	0	0	0	0	0	0	0	0	0	0	0	0	0	0
Scytodidae	Scytodes	aff. lineatipes	0	0	0	0	0	0	0	0	0	0	0	0	0	0	0	0	0	0	0	0	0	0	0	0	0	0	1	0	1	0	0	0	0	0	0	0	0	0	0	0	0	0	0	0	0	0	0
		itapevi	0	0	0	0	0	0	0	0	0	0	0	0	0	0	0	0	0	0	0	0	0	0	0	0	0	0	0	0	0	0	0	0	0	0	0	0	0	0	0	0	0	0	0	0	0	0	0
Segestriidae	Ariadna	cf. obscura	0	0	0	0	0	0	0	0	0	0	0	0	0	0	0	0	0	0	0	0	0	0	0	0	0	0	0	0	0	0	0	0	0	0	0	0	0	0	0	0	0	0	0	1	0	0	0
		sp. 02	0	0	0	0	0	0	0	0	0	0	0	0	0	0	0	0	0	0	0	0	0	0	0	0	0	0	0	0	0	0	0	0	0	0	0	0	0	0	0	0	0	0	0	0	0	0	0
Selenopidae	Selenops	melanurus	0	0	0	0	0	0	0	0	0	0	0	0	0	0	0	0	0	0	1	0	0	0	0	0	0	0	0	0	0	0	0	0	0	0	0	0	0	0	0	0	0	0	0	0	0	0	0
Senoculidae	Senoculus	iricolor	0	0	0	0	0	0	0	0	0	0	0	0	0	0	0	0	0	0	0	0	0	0	0	0	0	0	0	0	0	0	0	0	0	0	0	0	0	0	0	0	0	0	0	0	0	0	0
		sp. 01	0	0	0	0	0	0	0	0	0	0	0	0	0	0	0	0	0	0	0	0	0	0	0	0	0	0	0	0	0	0	0	0	0	0	0	0	0	0	0	0	0	0	0	0	0	0	0
Sicariidae	Loxosceles	adelaida	0	0	0	0	0	0	0	0	0	0	0	0	0	0	0	0	0	0	0	0	0	0	0	0	0	0	0	0	0	0	0	0	0	0	0	0	0	0	0	0	0	0	0	0	0	0	0
Sparassidae	Caayguara	albus	0	0	0	0	0	0	0	0	0	0	0	0	0	0	0	0	0	0	0	0	0	0	0	0	0	0	0	0	0	0	0	0	0	0	0	0	0	0	0	0	0	0	0	0	0	0	0
		cupepemayri	0	0	0	0	0	0	0	0	0	0	0	0	0	0	0	0	0	0	0	0	0	0	0	0	0	0	0	0	0	0	0	0	0	0	1	0	0	0	0	0	0	0	0	0	0	0	0
		pinda	0	0	0	7	0	0	0	0	0	0	0	0	0	0	0	0	0	0	0	0	0	0	0	0	0	0	0	0	0	0	0	0	0	0	0	0	0	1	0	0	0	0	0	0	0	0	6
	Polybetes	rapidus	0	0	0	0	0	0	0	0	0	0	0	0	0	0	0	0	0	0	0	0	0	0	0	0	0	0	0	0	0	0	0	0	0	0	0	0	0	0	0	0	0	0	0	0	0	0	0
	Stasina	americana	0	0	0	0	0	0	0	0	0	0	0	0	0	0	0	0	0	0	0	0	0	0	0	0	0	0	0	0	0	0	0	0	0	0	0	0	0	0	0	0	0	0	0	0	0	0	0
Synotaxidae	Synotaxus	longicaudatus	0	0	0	0	0	0	1	1	0	2	1	0	0	0	0	0	0	0	0	0	0	0	0	0	0	0	0	0	0	0	0	0	0	0	0	0	0	0	0	0	0	0	0	0	1	0	0
Tetragnathidae	Azilia	boudeti	2	0	0	0	3	1	0	0	0	0	0	0	0	0	1	0	1	0	0	0	0	0	0	0	1	0	1	0	0	0	0	0	0	0	0	0	0	1	0	0	1	0	1	0	0	0	0
	Chrysometa	boraceia	0	0	0	0	0	0	0	0	0	0	0	0	0	0	0	0	0	0	0	0	0	0	0	0	0	0	0	0	0	0	0	0	0	0	0	0	0	0	0	0	0	0	0	0	0	0	0
		ludibunda	0	0	0	0	0	0	0	0	1	0	0	0	0	0	1	0	2	0	4	0	1	1	0	0	0	0	0	0	2	0	0	0	0	1	0	0	2	2	0	0	1	0	0	0	0	0	2
		sp. n. 01	0	0	0	0	0	0	0	0	0	0	0	0	0	0	0	0	0	0	0	0	1	0	0	0	0	0	0	0	0	0	0	0	0	0	0	0	0	0	0	0	0	0	0	0	0	0	0
	Dolichognatha	pinheiral	0	0	0	0	0	0	0	0	0	0	0	0	0	0	0	0	0	0	0	0	0	0	0	0	0	0	0	0	0	0	0	0	0	0	0	0	0	0	0	0	0	0	0	0	0	0	0
	Leucauge	formosa	0	0	0	0	0	0	0	0	0	0	0	0	0	0	0	0	0	0	0	1	0	0	0	0	0	0	0	0	0	0	0	0	0	0	1	0	0	0	0	0	0	0	0	0	0	0	0
		pulcherrima	0	0	0	0	0	0	0	0	0	0	0	0	0	0	0	1	0	0	0	1	0	0	0	0	0	0	0	0	0	0	0	0	0	3	0	0	0	4	0	0	0	0	0	0	0	0	0
		turbida	0	0	0	1	0	0	0	0	0	0	0	0	0	0	0	0	0	0	0	0	0	0	0	0	0	0	0	0	0	0	0	0	0	0	0	0	0	0	0	0	0	0	0	0	0	0	1
	Metinae	sp. 01 aff. Cardimia	0	0	0	0	0	0	0	0	0	0	0	0	0	0	0	0	0	0	0	0	0	0	0	0	0	0	0	0	0	0	0	0	0	0	0	0	0	0	0	0	0	0	0	0	0	0	0
	Tetragnatha	cladognatha	0	0	0	0	0	0	0	0	0	0	0	1	0	0	0	3	0	0	0	2	0	0	0	0	0	0	0	0	0	0	0	0	0	11	1	0	0	10	0	0	0	0	0	0	1	0	0
		sp. 01	0	0	0	0	0	0	0	0	0	0	0	0	0	0	0	0	0	0	0	0	0	0	0	0	0	0	0	0	0	0	0	0	0	0	0	0	0	0	0	0	0	0	0	0	0	0	0
Theraphosidae	Catumiri	sp. 01	0	0	0	0	0	0	0	0	0	0	0	0	0	0	0	0	0	0	0	0	0	0	0	0	0	0	0	0	0	0	0	0	0	0	0	0	0	0	0	0	0	0	0	0	0	0	0
	Eupalaestrus	spinosissimus	0	0	0	0	0	0	0	0	0	0	0	0	0	0	0	0	0	0	0	0	0	0	0	0	0	0	0	0	0	0	0	0	0	0	0	1	0	0	0	0	0	0	0	0	0	0	0
	Homoeomma	familiare	0	0	0	0	0	0	0	0	0	0	0	0	0	0	0	0	0	0	0	0	0	0	0	0	0	0	0	0	0	0	0	0	0	0	0	0	1	0	0	0	0	0	0	0	0	0	0
	Lasiodora	fallax	0	0	0	0	0	0	0	0	0	0	0	0	0	0	0	0	0	0	0	0	0	0	0	0	0	0	0	0	0	0	0	0	0	0	0	0	0	0	0	0	0	0	0	0	0	0	0
	Magulla	buecherli	0	0	0	0	0	0	0	0	0	0	0	0	0	0	0	0	0	0	0	0	0	0	0	0	0	0	0	0	0	0	0	0	0	0	0	0	0	0	0	0	0	0	0	0	0	0	0
	Plesiopelma	sp. 01	0	0	0	0	0	0	0	0	0	0	0	0	0	0	0	0	0	0	0	0	0	0	0	1	0	0	0	0	0	0	0	0	0	0	0	0	0	0	0	0	0	0	0	0	0	0	0
Theridiidae	Achaearanea	tingo	0	0	0	0	0	0	0	0	0	0	0	0	0	0	0	0	0	0	0	0	0	0	0	0	0	0	0	0	0	0	0	0	0	0	0	0	0	0	0	0	0	0	0	0	0	0	0
	Anelosimus	dubiosus	0	0	0	0	0	0	0	0	0	0	0	0	0	0	0	0	0	0	0	0	0	0	0	0	0	0	0	0	0	0	0	0	0	0	0	0	0	0	0	0	0	0	0	0	0	0	0
		ethicus	0	0	0	0	0	0	0	0	0	0	0	0	0	0	0	0	0	0	0	0	0	0	0	0	0	0	0	0	0	0	0	0	0	0	0	0	0	0	0	0	0	0	0	0	0	0	0
		studiosus	0	0	0	0	0	0	0	0	0	0	0	0	0	0	0	0	0	0	0	0	0	0	0	0	0	0	0	0	0	0	0	0	0	0	0	0	0	0	0	0	0	0	0	0	0	0	0
	Argyrodes	elevatus	0	0	0	0	0	0	0	0	0	0	0	0	0	0	0	0	0	0	0	0	0	0	0	0	0	0	0	0	0	0	0	0	0	0	0	0	0	0	0	0	0	0	0	0	0	0	0
	Chrosiothes	niteroi	0	0	0	0	0	0	0	0	0	1	0	0	0	0	0	4	0	0	0	0	1	0	0	0	0	0	0	0	0	0	0	0	0	0	0	0	0	0	0	0	1	0	0	1	0	0	0
		sp. n. aff. perfidus	0	0	0	0	0	0	0	0	0	0	0	0	0	0	0	0	0	0	0	0	0	0	0	0	0	0	0	0	0	0	0	0	0	0	0	0	0	0	0	0	0	0	0	0	0	0	0
	Chrysso	compressa	0	0	0	0	0	0	3	0	0	0	0	0	0	5	0	0	1	0	0	1	1	0	0	0	0	2	0	0	0	2	1	0	0	4	4	0	0	0	0	0	0	0	0	1	1	0	0
	Coleosoma	floridanum	0	0	0	0	0	0	0	0	2	0	0	0	0	0	0	0	0	0	0	0	0	0	0	0	0	0	0	0	0	0	0	0	0	0	0	0	0	0	0	0	0	0	0	0	0	0	0
	Cryptachaea	aff. pilaton	0	0	0	0	0	0	0	0	0	0	0	0	0	0	0	0	0	0	0	0	0	0	0	0	0	0	0	0	0	0	0	0	0	0	0	0	0	0	0	0	0	0	2	0	0	0	0
		bellula	0	0	0	0	0	0	0	0	0	0	0	0	0	0	0	0	0	0	0	0	0	0	0	0	0	0	0	0	0	0	0	0	0	0	0	0	0	0	0	0	0	0	0	0	0	0	0
		dea	1	4	0	0	0	1	0	0	1	0	0	0	0	0	1	1	0	0	0	0	0	0	0	0	0	0	0	0	0	0	0	0	0	0	0	0	0	1	0	1	0	1	0	0	0	0	0
		digitus	4	2	0	1	1	1	0	4	3	1	1	3	7	4	1	1	1	0	0	0	0	0	0	0	4	2	5	0	1	0	1	0	0	1	1	0	2	4	1	0	3	5	3	2	0	1	0
		hirta	0	0	0	0	0	0	0	0	0	0	0	0	0	0	0	0	0	0	0	0	0	0	0	0	0	0	0	0	0	0	0	0	0	0	0	0	0	0	0	0	0	0	0	0	0	0	0
		inops	0	0	0	0	0	0	0	0	0	0	0	0	0	0	0	0	0	0	0	0	0	0	0	0	0	0	0	0	0	0	0	0	0	1	0	0	0	0	0	0	1	0	0	0	0	0	0
		passiva	1	0	0	0	0	0	1	0	0	2	2	0	2	1	0	0	0	0	0	0	1	1	0	0	0	0	0	0	0	0	1	0	0	0	0	0	0	0	0	0	0	0	0	2	0	0	0
		rioensis	2	1	4	0	0	1	0	0	0	0	0	0	8	0	2	0	1	0	0	0	0	0	0	0	1	0	2	0	0	0	0	0	0	0	0	0	0	1	3	0	1	5	6	0	0	0	2
		sicki	0	0	0	0	0	0	0	0	0	0	0	0	0	0	0	0	0	0	0	0	0	0	0	0	0	0	0	0	0	0	0	0	0	0	0	0	0	0	0	0	0	0	0	0	0	0	0
		sp. n. aff. oblivia "carapaça marrom, com pigmento cinza-enegrecido esparso, abdome amarelado, com duas séries de manchas cinza-enegrecidas, anel arroxeado em torno das fiandeiras, pernas amarelas, uniformes, esterno castanho-avermelhado, epígino formado por uma crista alta e fina posterior, cujas extremidades portam as aberturas copulatórias dos dutos, os quais são largos e visíveis posteriormen…	0	0	0	0	0	0	0	0	0	0	0	0	1	0	0	0	0	0	0	0	0	0	0	0	0	0	0	0	0	0	0	0	0	0	0	0	0	0	0	0	0	0	0	0	0	0	0
		triguttata	0	0	0	0	0	0	0	1	0	1	0	0	0	2	0	1	0	0	1	0	0	1	0	0	0	1	0	0	0	0	0	0	0	0	1	0	0	0	0	0	0	0	0	0	0	0	0
	Cryptachaea?	sp. 01	0	0	0	0	0	0	0	0	0	0	0	0	0	0	0	0	0	0	0	0	0	0	0	0	0	0	0	0	0	0	0	0	0	0	0	0	0	0	0	0	0	0	0	0	0	0	0
	Dipoena	aff. cordiformis	0	0	0	0	0	0	0	0	0	0	0	0	0	0	0	0	0	0	0	0	0	0	0	0	0	0	0	0	0	0	0	0	0	0	0	0	0	0	0	0	0	0	0	0	0	0	0
		aff. donaldi	0	0	0	0	0	0	0	0	0	0	0	0	0	0	0	0	0	0	0	0	0	0	0	0	0	0	0	0	0	0	0	0	0	0	0	0	0	0	0	0	0	0	0	0	0	0	0
		aff. hortoni	0	0	0	0	0	0	0	0	0	0	0	0	0	0	0	0	0	0	0	0	0	0	0	0	0	0	0	0	0	0	0	0	0	0	0	0	0	0	0	0	0	0	0	0	0	0	0
		aff. kuyuwini	0	0	0	0	0	0	0	0	0	0	0	0	0	0	0	0	0	0	0	0	0	0	0	0	0	0	0	0	0	0	1	0	0	0	0	0	0	0	0	0	0	0	0	0	0	0	0
		bryantae	0	0	0	0	0	0	0	0	0	0	0	0	0	0	0	0	0	0	0	0	0	0	0	0	0	0	0	0	0	0	0	0	0	0	0	0	0	0	0	0	0	0	0	0	0	0	0
		cornuta	0	0	0	0	0	0	0	0	0	0	0	0	0	0	0	0	0	0	0	0	0	0	0	0	0	0	0	0	0	0	0	0	0	0	0	0	0	0	0	0	0	0	0	0	0	0	0
		ira	0	0	0	0	0	0	0	0	0	0	0	0	0	0	0	0	0	0	0	0	0	0	0	0	0	1	0	0	1	0	1	0	0	0	0	0	0	0	0	0	0	0	0	0	0	0	0
		militaris	0	0	0	0	0	0	0	0	0	0	0	0	0	1	0	0	0	0	0	0	0	0	0	0	0	1	0	0	0	0	0	0	0	0	0	0	0	0	0	0	0	0	0	1	0	0	0
		niteroi	0	0	0	0	0	0	0	1	0	0	0	0	0	0	0	0	0	0	0	0	0	0	0	0	0	0	0	0	0	0	0	0	0	1	0	0	0	0	0	0	0	0	0	0	0	0	0
		pumicata	0	0	2	0	0	1	0	0	0	0	1	0	0	0	0	1	0	0	0	0	0	0	0	0	0	2	0	0	0	0	0	0	0	0	0	0	0	0	0	0	0	0	6	2	0	0	0
		pusilla	0	0	0	0	0	0	0	0	0	0	0	0	0	0	0	0	0	0	0	0	0	0	0	0	0	0	0	0	0	0	0	0	0	0	0	0	0	0	0	0	0	0	0	0	0	0	0
		sicki	0	0	0	0	0	0	0	0	0	0	0	0	0	0	0	0	0	0	0	0	0	0	0	0	0	0	0	0	0	0	0	0	0	0	0	0	0	0	0	0	0	0	0	0	0	0	0
		sp. n. aff. granulata 1	0	0	0	0	0	0	0	0	0	0	0	0	0	0	0	0	0	0	0	0	0	0	0	0	0	1	0	0	0	0	2	0	0	0	0	0	0	0	0	0	0	0	0	0	0	0	0
		sp. n. aff. granulata 2	0	0	0	0	0	0	0	0	0	0	0	0	0	0	0	0	0	0	0	0	0	0	0	0	0	0	0	0	0	0	0	0	0	0	0	0	0	0	0	0	0	0	0	0	0	0	0
		sp. n. aff. plaumanni	0	0	0	0	0	0	0	0	3	0	0	0	0	0	0	0	0	0	0	0	0	0	0	0	0	0	0	0	0	0	0	0	0	0	0	0	0	0	0	0	0	0	0	0	0	0	0
	Echinotheridion	cartum	2	0	1	0	0	1	1	0	0	3	3	0	0	0	0	0	0	0	0	0	0	0	0	0	0	0	0	0	0	0	0	0	0	0	0	0	2	0	0	0	0	0	1	1	0	3	0
	Episinus	cognatus	0	0	0	0	0	0	0	0	0	0	0	0	0	0	0	0	0	0	1	0	0	0	0	0	0	0	0	0	0	0	0	0	0	0	0	0	0	0	0	0	0	0	0	0	0	0	0
	Exalbidion	sp. n. aff. sexmaculatum	0	0	0	0	0	0	0	1	0	2	2	0	0	0	0	0	0	0	0	0	1	2	0	0	0	0	0	0	0	0	0	0	0	0	0	0	0	0	0	0	0	1	0	1	1	1	0
	Faiditus	acuminatus	0	0	0	0	0	0	0	0	0	2	0	0	0	0	0	1	0	0	0	0	0	0	0	0	0	0	0	0	0	0	0	0	0	2	0	0	0	3	0	0	0	0	0	0	0	0	0
		aff. jamaicensis	0	0	0	0	0	0	0	1	0	0	0	0	0	0	0	0	0	0	0	0	0	0	0	0	0	0	0	0	0	0	0	0	0	0	0	0	0	0	0	0	0	0	0	0	0	0	0
		caudatus	0	0	0	0	0	0	0	0	0	0	0	0	0	0	0	0	0	0	0	1	1	0	0	0	0	0	0	0	0	0	0	0	0	0	1	0	0	0	0	0	0	0	0	1	0	0	1
	Janula	bicorniger	0	4	1	2	0	0	0	1	1	0	2	0	0	1	0	0	0	0	2	3	1	2	0	0	0	0	0	0	2	0	1	0	2	0	1	0	0	5	0	0	0	0	0	0	0	0	0
	Neospintharus	rioensis	0	0	0	0	0	0	0	0	0	0	0	0	0	0	0	0	0	0	0	0	0	0	0	0	0	0	0	0	0	0	0	0	0	0	0	0	0	0	0	0	0	0	0	0	0	0	0
	Parasteatoda	tesselata	0	0	0	0	0	0	0	0	0	0	0	0	0	0	0	0	0	0	0	0	0	0	0	0	0	0	0	0	0	0	0	0	0	0	0	0	0	0	0	0	0	0	0	0	0	0	0
	Phoroncidia	rubromaculata	0	0	0	0	0	0	0	0	0	0	0	0	0	0	0	0	0	0	0	0	0	0	0	0	0	0	0	0	0	0	0	0	0	0	0	0	0	0	0	0	0	0	0	0	0	0	0
	Rhomphaea	metaltissima	0	0	0	0	0	0	0	0	0	0	0	0	0	0	0	0	0	0	0	0	0	0	0	0	0	0	0	0	0	0	0	0	0	0	0	0	0	0	0	0	0	0	0	0	0	0	0
	Spintharus	gracilis	0	0	0	0	0	0	0	0	0	0	0	0	0	1	0	0	0	0	0	0	0	0	0	0	0	0	0	0	0	0	0	0	0	0	0	0	0	0	0	0	0	0	0	0	0	0	0
	Stemmops	sp. n. aff. carius	0	0	0	0	0	0	0	0	0	0	0	0	0	0	0	0	0	0	0	0	0	0	1	0	0	0	0	2	0	0	0	0	0	0	0	0	0	0	0	0	0	0	2	0	0	0	0
		sp. n. aff. questa	0	0	0	0	0	0	0	0	0	0	0	0	0	0	0	0	0	0	0	0	0	0	0	0	0	0	0	0	0	0	0	0	0	0	0	0	0	0	0	0	0	0	0	0	0	0	0
		sp. n. aff. servus	0	0	0	0	0	0	0	0	0	0	0	0	0	0	0	0	0	0	0	0	0	0	0	0	0	0	0	0	0	0	0	0	0	0	0	0	0	0	0	0	0	0	0	0	0	0	0
	Styposis	sp. n. aff. colorados	0	0	0	0	0	0	0	0	0	0	0	0	0	0	0	0	0	6	0	0	0	0	0	0	0	0	0	10	0	0	0	2	0	0	0	0	0	0	1	0	0	0	0	0	0	0	0
	Theridion	aff. hispidum "abdome palido, com um par de manchas negras anterior e outro posterior, entre elas há um grande número de manchas irregulares brancas	0	0	0	0	0	0	0	0	0	0	0	0	0	0	0	0	0	0	0	0	0	0	0	0	0	0	0	0	0	0	0	0	0	0	0	0	0	0	0	0	0	0	0	0	0	0	0
		biezankoi	0	0	0	0	0	0	0	0	0	0	0	0	0	0	0	0	0	0	0	0	1	0	0	0	0	0	0	0	0	0	0	0	0	3	6	0	0	0	0	0	0	0	0	0	0	0	0
		calcynatum	0	0	0	0	0	0	0	0	0	0	0	0	0	0	0	0	0	0	0	0	0	0	0	0	0	0	0	0	0	0	0	0	0	4	3	0	0	0	0	0	0	0	0	0	1	0	0
		sp. n. aff. bergi "carapaça castanho claro, abdome amarelo pálido, com 2 faixas negras irregulares laterais e margem anterior projetada em aparelho estridulante grande sobre a carapaça	0	0	0	0	0	0	0	0	0	0	0	0	0	0	0	0	0	0	0	0	0	0	0	0	0	0	0	0	0	0	0	0	0	0	0	0	0	0	0	0	0	0	0	0	0	0	0
		sp. n. aff. cohni "carapaça pálida com pigmento negro esparso nas laterais, abdome com 2 faixas negras ladeando fólio branco na metade anterior, metade posterior esbranquiçada, salpicada de negro, ventre com mancha branca mediana e anel negro em torno das fiandeiras, F com epígino apresentando posteriormente grande lábio côncavo, retangular, com fóvea estreita e larga na margem anterior do lábio,…	0	0	0	0	0	0	0	1	0	0	0	0	0	0	0	0	0	0	0	0	3	0	0	0	0	0	0	0	0	0	0	0	0	0	2	0	0	0	0	0	0	0	0	0	0	1	0
		sp. n. aff. niveum "F toda amarelo-pálido, epígino formado por uma simples fenda transversal, com 2 espermatecas oblongas, grandes, anteriores, M com abdome com 2 manchas negras pequenas nas laterais anteriores do dorso e uma mancha negra maior, terminal, área ocular anterior projetada para frente e com cerdas e com 2 pequenos tubérculos no clípeo, palpo complexo com apófise lateral em forma de v…	0	0	0	0	0	0	0	0	0	0	3	0	0	16	0	0	0	0	1	2	2	0	0	0	0	5	0	0	0	0	1	0	0	0	0	0	0	0	0	0	0	0	0	0	0	0	0
		sp. n. aff. opolon "cefalotórax amarelo-alaranjado, com bordas enegrecidas, abdome amarelo pálido, geralmente com 3 pares de manchas negras laterais, ladeando 4 pares de manchas brancas no eixo mediano, grande mancha negra posterior, epígino com área mediana da margem posterior projetada para cima, precedida por uma concavidade rasa, a qual é ladeada pelos dutos negros, paralelos, vazando nos lad…	0	0	0	0	0	0	0	0	0	0	0	0	0	0	0	0	0	0	0	0	0	0	0	0	0	0	0	0	0	0	0	0	0	0	0	0	0	0	0	0	0	0	0	0	0	0	0
		sp. n. aff. topo	0	0	0	0	0	0	0	0	0	0	0	0	0	0	0	0	0	0	0	2	0	0	0	0	0	0	0	0	0	0	0	0	0	0	0	0	0	0	0	0	0	0	0	0	0	0	0
		teresae	0	0	0	0	0	0	1	1	1	0	0	0	0	1	0	0	0	0	2	1	1	2	0	0	0	3	0	0	0	0	1	0	0	0	0	0	0	0	0	0	0	0	0	0	1	0	0
	Thwaitesia	affinis	0	2	0	0	0	0	0	4	0	1	1	0	0	5	0	2	1	0	1	2	2	1	0	0	0	5	0	0	1	0	3	0	1	0	2	0	0	0	0	0	0	0	0	1	0	0	0
	Thymoites	sp. n. aff. melloleitaoni	1	0	1	8	1	4	0	0	0	0	0	0	1	1	0	0	0	2	15	0	0	0	0	0	0	1	1	4	22	0	0	3	1	0	0	0	0	0	0	0	2	0	0	0	0	0	0
	Tidarren	haemorrhoidale	0	0	0	0	0	0	0	0	0	0	0	0	0	0	0	0	0	0	0	0	0	0	0	0	0	0	0	0	0	0	0	0	0	0	0	0	0	0	0	0	0	0	1	0	0	0	0
	Wamba	crispulus	0	0	0	0	0	0	0	0	0	0	0	0	0	0	0	0	0	0	0	0	0	0	0	0	0	0	0	0	0	0	0	0	0	0	0	0	0	0	0	0	0	0	0	0	0	0	0
	Wirada	tijuca	0	0	1	0	0	0	0	0	0	0	0	0	0	0	0	0	0	0	0	0	0	0	0	0	0	0	0	0	0	0	0	0	0	0	0	0	0	0	0	0	0	0	0	0	0	0	0
Theridiosomatidae	Chthonos	sp. n. 01 "atypica"	0	0	1	0	0	0	0	0	0	0	0	0	0	0	0	0	0	0	3	0	0	1	0	0	0	0	0	0	0	0	1	0	1	0	0	0	0	0	0	0	0	0	0	0	0	0	0
		tuberosa	0	0	0	0	0	0	0	1	0	0	0	0	0	1	0	0	0	0	1	0	0	0	0	0	0	1	0	0	0	0	1	0	0	0	0	0	0	0	0	0	0	0	0	0	0	0	0
	Theridiosoma	sp. n. 01 "abdome cinzento, com faixa prateada no final do terço anterior e campo negro após"	0	0	0	0	0	0	0	0	0	0	0	0	1	0	0	0	0	0	0	0	0	0	0	0	0	0	0	0	0	0	0	0	0	0	0	0	0	1	0	0	0	0	0	0	0	0	0
		sp. n. 02 "abdome todo negro"	0	1	0	0	0	0	0	0	0	0	0	0	0	0	0	0	0	0	0	0	0	0	0	0	0	0	0	0	0	0	0	0	0	0	0	0	0	0	0	0	0	0	0	0	0	0	0
		sp. n. 03 "abdome pálido, com área anterior prateada, um par de manchas negras laterais na parte posterior da área prateada e uma série de manchas negras irregulares até o final do dorso"	0	0	0	0	0	0	0	0	0	0	0	0	0	0	0	0	0	0	0	0	0	0	0	0	0	0	0	0	0	0	0	0	0	0	0	0	0	0	0	0	0	0	0	0	0	0	0
	Wendilgarda	cf. nigra	0	0	0	0	0	0	0	0	0	0	0	0	0	0	0	0	0	0	0	0	0	0	0	0	0	0	0	0	0	0	0	0	0	0	0	0	0	0	0	0	0	0	0	0	0	0	0
Thomisidae	Acentroscelus	cf. secundus	0	0	0	0	0	0	0	0	0	0	0	0	0	0	0	0	0	0	0	0	0	0	0	0	0	1	0	0	0	0	1	0	1	0	0	0	0	0	0	0	0	0	0	0	0	0	0
	Epicadinus	gavensis	0	0	0	2	0	0	0	0	0	0	0	0	0	0	0	0	0	0	0	0	0	0	0	0	0	0	0	0	0	0	0	0	0	0	0	0	0	0	0	0	0	0	0	0	0	0	0
	Epicadus	planus	0	0	0	0	0	0	0	1	0	0	0	0	0	0	0	0	0	0	0	0	0	0	0	0	0	0	0	0	0	0	0	0	0	0	0	0	0	0	0	0	0	0	0	0	0	0	1
	Misumenops	cf. callinurus	0	0	0	0	0	0	0	0	0	0	0	0	0	0	0	0	0	0	0	0	0	0	0	0	0	0	0	0	0	0	0	0	0	0	0	0	0	0	0	0	0	0	0	0	0	0	0
	Onocolus	simoni	0	0	0	0	0	0	0	0	0	0	0	0	0	0	0	0	0	0	0	0	0	0	0	0	0	1	0	0	1	0	0	0	0	0	0	0	0	0	0	0	0	0	0	0	0	0	0
	Strophius	nigricans	0	0	0	0	0	0	0	0	0	0	0	0	0	0	0	0	0	0	0	0	0	0	0	0	0	0	0	0	0	0	0	0	0	0	0	0	0	0	0	0	0	0	0	0	0	0	0
	Tmarus	aff. albolineatus	0	0	0	0	0	0	0	0	0	0	0	0	0	0	0	0	0	0	0	0	0	0	0	0	0	0	0	0	0	0	0	0	0	0	0	0	0	0	0	0	0	0	0	0	0	0	0
		sp. 01 "corpo alongado, carapaça e pernas castanhas, de cor uniforme, abdome alongado, castanho esverdeado ou acinzentado, abundantes pontos de cor vinho, tubérculo alto no final do terço médio, epígino com 2 fossetas medianas e espermatecas pequenas dirigidas posteriormente, M com tíbia do palpo normal, ATR subdividida em dois ramos curtos e rombos, com ramo ventral mais largo e com aba na marge…	0	0	0	0	0	0	0	0	0	0	0	0	0	0	0	0	0	0	0	0	0	0	0	0	0	0	0	0	0	0	0	0	0	0	0	0	0	0	0	0	0	0	0	0	0	0	0
		sp. 02 "corpo pouco alongado, carapaça castanho escura, com abundantes manchas mais claras, faixa branco sujo entre fóvea e área ocular, declive posterior castanho claro, abdome relativamente curto, com tubérculo variando de alto a baixo no início do terço posterior e geralmente com 2 tubérculos bem baixos, arredondados, negros, no início do terço médio, castanho escuro, abundantes pontos de cor …	0	0	0	0	0	0	0	0	0	0	0	0	0	0	0	0	0	0	0	0	0	0	0	0	0	0	0	0	0	0	0	0	0	0	0	0	0	0	0	0	0	0	0	0	0	0	0
		sp. 03 "corpo curto, carapaça castanho escura, com abundantes manchas mais claras, declive posterior enegrecido, abdome pentagonal, sem tubérculo, castanho, com faixas transversais alternadas quase brancas e escuras, abundantes pontos de cor vinho na fóvea, também existentes nas pernas, ATR robusta, projetando-se para cima do bulbo, com projeção espiniforme fina na face externa, projeção tegular …	0	0	0	0	0	0	0	1	0	0	0	0	0	0	0	0	0	0	0	0	0	0	0	0	0	1	0	0	0	0	0	0	0	0	1	0	0	0	0	0	0	0	0	1	0	0	0
		sp. 04 "corpo alongado, carapaça castanho clara, com 2 faixas longitudinais mais escuras abaixo dos OLP, declive posterior castanho escuro, abdome alongado, sem tubérculo, mas bem mais largo no final do terço médio, abundante pigmento branco e vinho no dorso, pernas castanhas, com abundantes manchas vinho e faixa castanho escura no fêmur I"	0	0	0	0	0	0	0	0	0	0	0	0	0	0	0	0	0	0	0	0	0	0	0	0	0	0	0	0	0	0	0	0	0	0	0	0	0	0	0	0	0	0	0	0	0	0	0
		sp. 05 "corpo alongado, carapaça castanha, com pigmento branco e pontos cor de vinho, campo negro posterior apenas lateral, parte inicial do declive branca, laterais castanho-escuras e parte traseira castanha, pernas castanhas, com pigmento branco no fêmur, abdome alongado, esbranquiçado, muito alto, sem tubérculo, mas com acentuado declive no final do terço médio, epígino com grande fóvea anteri…	0	0	0	0	0	0	0	0	0	0	0	0	0	0	0	0	0	0	0	0	0	0	0	0	0	1	0	0	0	0	0	0	0	0	0	0	0	0	0	0	0	0	0	0	0	0	0
		sp. 06 "corpo curto, carapaça castanha, com área branca na linha mediana, declive posterior negro, com exceção do vértice da área clara, abdome relativamente curto, com tubérculo alto, castanho escuro, mas com abundante pigmento branco e alguns pontos de cor vinho no terço anterior, esterno e faixa ventral do abdome escuros, epígino enrugado anteriormente, com placa mediana de bordas laterais arr…	0	0	0	0	0	0	0	0	0	0	0	0	0	0	0	0	0	0	0	0	0	0	0	0	0	0	0	0	0	0	0	0	0	0	0	0	0	0	0	0	0	0	0	0	0	0	0
	Tobias	cf. caudatus	0	0	0	0	0	0	0	0	0	0	0	0	0	0	0	0	0	0	0	0	0	0	0	0	0	5	0	0	0	0	1	0	2	0	0	0	0	0	0	0	0	0	0	0	0	0	0
Trechaleidae	Enna	aff. redundans	0	0	0	3	0	0	0	0	0	0	0	0	0	0	0	0	0	0	0	1	0	0	0	0	0	0	0	0	0	0	0	0	0	1	1	0	0	0	0	0	0	0	0	0	0	0	1
	Trechaleoides	biocellata	0	0	0	0	0	0	0	0	0	0	0	0	0	0	0	0	0	0	0	0	0	0	0	0	0	0	0	0	0	0	0	0	0	0	0	0	2	1	0	0	0	0	0	0	0	0	0
Uloboridae	Miagrammopes	sp. 01 "carapaça com faixas marginais negras, recobrindo os olhos de cada lado, abdome com faixa pálida central e 4 pares de manchas brancas, de tamanhos diferentes, sobre um fundo cinza escuro"	0	0	0	0	0	0	0	0	0	2	1	0	0	0	0	0	0	0	0	0	0	1	0	0	0	0	0	0	0	0	0	0	0	0	1	0	0	0	0	0	0	0	0	0	1	0	1
	Philoponella	fasciata	10	1	0	0	1	0	4	1	0	2	4	0	0	0	1	0	0	0	0	1	0	0	0	0	0	1	1	0	0	1	0	0	0	2	1	0	0	0	0	0	7	1	3	0	2	10	0
		vittata	0	0	0	0	0	0	0	0	0	0	0	0	0	0	0	0	0	0	0	0	0	0	0	0	0	0	0	0	0	0	0	0	0	0	0	0	0	0	0	0	0	0	0	0	0	0	0
	Uloborus	sp. 01	0	0	0	0	0	0	0	0	0	0	0	0	0	0	0	0	0	0	0	0	0	0	0	0	0	0	0	0	0	0	0	0	0	0	0	0	0	0	0	0	0	0	0	0	0	0	0
Zodariidae	Tenedos	eduardoi	0	0	0	0	0	0	0	0	0	0	0	0	0	0	0	0	0	0	0	0	0	0	0	0	0	0	0	0	0	0	0	0	0	0	0	0	0	0	0	0	0	0	0	0	0	0	0
Zoridae	Paravulsor	pulcher	0	0	0	0	0	0	0	0	0	0	0	0	0	0	0	0	0	0	0	0	0	0	1	0	0	0	0	0	0	0	0	0	0	0	0	0	0	1	0	0	0	0	2	0	0	0	0
Total Geral			93	88	55	100	37	29	55	81	36	66	85	15	36	96	48	54	50	31	73	79	57	70	11	16	26	81	50	30	68	48	56	21	29	69	78	1	41	73	24	15	49	63	58	60	41	69	38
[truncated: 355 more columns]

## Sheet: ResEst
EstimateS (Version 9.1.0), Copyright R. K. Colwell: http://purl.oclc.org/estimates
Diversity Output from Input File: (June 23, 2014)
Samples	Individuals (computed)	S(est)	S(est) 95% CI Lower Bound	S(est) 95% CI Upper Bound	S(est) SD	S Mean (runs)	Singletons Mean	Singletons SD (runs)	Doubletons Mean	Doubletons SD (runs)	Uniques Mean	Uniques SD (runs)	Duplicates Mean	Duplicates SD (runs)	ACE Mean	ACE SD (runs)	ICE Mean	ICE SD (runs)	Chao 1 Mean	Chao 1 95% CI Lower Bound	Chao 1 95% CI Upper Bound	Chao 1 SD (analytical)	Chao 2 Mean	Chao 2 95% CI Lower Bound	Chao 2 95% CI Upper Bound	Chao 2 SD (analytical)	Jack 1 Mean	Jack 1 SD (analytical)	Jack 2 Mean	Jack 2 SD (runs)	Bootstrap Mean	Bootstrap SD (runs)	MMRuns Mean	MMMeans (1 run)	Cole Rarefaction	Cole SD (analytical)	Alpha Mean	Alpha SD (analytical)	Shannon Mean	Shannon SD (runs)	Shannon Exponential Mean	Shannon Exponential SD (runs)	Simpson Inv Mean	Simpson Inv SD (runs)
1	36.12	14.41	11.75	17.06	1.35	14.04	8.22	5.25	2.32	1.94	14.04	9	0	0	31.34	22.49	14.04	9	32.4	18.16	103.07	17.29	14.04	22.19	22.24	0.01	14.04	0	0	0	14.04	9	0	0	25.32	4.08	0	0	0	0	0	0	0	0
2	72.24	26.53	22.02	31.03	2.3	26.67	14.69	6.65	4.75	3.19	24.73	11.37	1.94	2.64	56.18	30.92	342.9	424.13	58.34	35.08	156.84	25.66	144	68.26	430.11	77.58	39.04	5.21	39.04	17.8	32.85	14.99	68.25	167.12	42.02	4.87	0	0	0	0	0	0	0	0
3	108.36	37	31.12	42.87	3	36.97	19.37	6.63	6.53	3.29	31.61	11.22	4.76	3.24	68.68	23.95	261.01	221.01	74.62	48.3	171.58	26.78	147.11	72.78	412.69	74.16	58.04	8.11	67.79	23.7	46.51	16.22	137.91	171.11	55.03	5.29	0	0	0	0	0	0	0	0
4	144.48	46.23	39.28	53.18	3.55	44.59	22.73	6.96	7.81	3.68	35.7	11.37	7.22	4	81.83	26.1	197.91	108.74	84.55	58.05	167.43	24.64	132.54	75.53	308.65	52.52	71.37	8.94	86.81	27.61	56.34	18.17	1329.44	174.89	65.83	5.56	0	0	0	0	0	0	0	0
5	180.6	54.5	46.67	62.32	3.99	53.17	26.3	7.26	9.34	3.82	40.95	11.89	8.79	4.59	95.34	26.91	192.99	83.61	96.01	68.75	174.86	24.25	152.07	90.6	334.49	55.19	85.93	10.15	106.54	30.55	67.3	19.6	239.49	178.46	75.1	5.74	0	0	0	0	0	0	0	0
6	216.72	61.99	53.44	70.55	4.37	60.71	29.15	7.89	10.4	3.91	44.42	12.79	10.78	5.07	104.57	29.11	182.22	71.8	106.73	78.47	182.13	24.08	153.11	99.47	284.59	43.64	97.73	10.95	121.59	34.69	76.59	22.02	418.48	181.81	83.23	5.87	0	0	0	0	0	0	0	0
7	252.84	68.85	59.66	78.03	4.69	68.06	31.83	7.34	11.85	3.86	47.96	11.18	12.79	5.73	113.86	26.82	182.78	58.6	116.12	87.41	188.6	23.75	159.21	107.81	280.54	40.96	109.17	12.08	135.81	31.21	85.67	20.46	529.4	184.95	90.48	5.97	0	0	0	0	0	0	0	0
8	288.96	75.17	65.44	84.89	4.96	74.87	34.1	6.98	13.09	4.03	50.33	10.28	15.02	5.79	122.63	25.25	180.41	42.97	123.76	95.17	193.58	23.23	157.99	112.88	258.56	34.87	118.91	12.34	147	30.03	93.8	20.35	382.68	187.91	97.01	6.05	0	0	0	0	0	0	0	0
9	325.08	81.03	70.83	91.23	5.2	79.83	35.5	7.39	13.67	4.17	51.65	10.67	16.15	5.96	128.39	26.17	181.76	41.73	130.54	101.28	200.57	23.52	161.58	118.02	256.47	33.26	125.74	12.12	154.92	31.92	99.59	21.66	224.11	190.68	102.95	6.12	0	0	0	0	0	0	0	0
10	361.2	86.49	75.87	97.11	5.42	85.14	37.42	7.25	14.69	4.32	53.77	10.32	17.31	5.97	135.09	25.49	186.62	40.35	137.16	107.53	207.15	23.64	168.19	124.68	260.86	32.83	133.53	12.67	164.24	31.24	105.98	21.26	250.12	193.3	108.41	6.17	0	0	0	0	0	0	0	0
11	397.32	91.6	80.61	102.6	5.61	90.66	39.04	7.42	15.63	4.54	55.26	10.62	19.03	6.01	141.36	26.44	189.52	40.16	143.47	113.87	211.68	23.3	169.5	129.15	253.06	29.99	140.9	12.92	172.1	32.34	112.4	21.84	266.27	195.78	113.46	6.22	0	0	0	0	0	0	0	0
12	433.44	96.41	85.09	107.74	5.78	94.43	39.97	7.23	16.16	4.47	56.11	10.28	19.93	5.51	145.33	25.18	191.94	38.85	147.73	118.08	215.39	23.22	171.64	132.56	251.51	28.85	145.86	13.09	177.52	31.51	116.74	21.09	444.04	198.12	118.15	6.26	0	0	0	0	0	0	0	0
13	469.56	100.95	89.32	112.57	5.93	98.95	41.18	7.09	16.9	4.17	57.66	9.55	20.89	5.47	150.45	24.69	197.49	36.31	152.31	123.08	217.39	22.6	178.13	138.36	258.66	29.21	152.17	13.45	184.76	29.02	122.06	19.1	750.15	200.34	122.54	6.29	0	0	0	0	0	0	0	0
14	505.68	105.24	93.34	117.13	6.07	103.76	42.73	6.93	17.57	4.34	59.54	9.49	21.91	5.5	156.61	24.1	205.27	36	159.28	129.19	225.4	23.1	184.37	144.46	263.91	29.07	159.05	13.78	192.75	28.76	127.79	18.74	27038	202.45	126.66	6.32	0	0	0	0	0	0	0	0
15	541.8	109.31	97.17	121.45	6.19	108.48	43.87	6.77	18.4	4.13	60.82	9.25	23.03	5.42	161.36	23.23	210.16	36.21	164.02	134.25	228.53	22.68	188.12	149.18	264.67	28.16	165.25	13.9	199.42	28.32	133.22	18.45	400.65	204.46	130.54	6.35	0	0	0	0	0	0	0	0
16	577.92	113.18	100.82	125.55	6.31	111.68	44.6	6.8	18.91	4.17	61.34	9.33	23.68	5.37	164.57	23.83	211.27	35.49	167.85	137.91	232.24	22.72	191.04	152.42	266.58	27.85	169.19	13.84	203.52	29.31	136.8	18.96	538.82	206.38	134.22	6.37	0	0	0	0	0	0	0	0
17	614.03	116.88	104.31	129.44	6.41	115.39	45.56	6.97	19.36	4.25	62.14	9.26	24.47	5.15	168.68	24.67	214.06	34.51	172.83	142.42	237.75	22.99	193.6	155.86	266.83	27.1	173.87	13.73	208.46	29.72	141	19.26	311.78	208.22	137.71	6.4	0	0	0	0	0	0	0	0
18	650.15	120.41	107.66	133.15	6.5	118.59	46.01	6.83	19.89	4.65	62.64	8.61	25	5.31	171.44	24.17	215.93	32.21	176.16	145.75	240.9	22.95	196.36	158.95	268.69	26.81	177.75	13.71	212.51	28.1	144.55	18.75	885.02	209.99	141.03	6.41	0	0	0	0	0	0	0	0
19	686.27	123.78	110.87	136.7	6.59	122.38	46.5	7.16	20.68	4.71	63.41	8.8	25.74	5.12	174.57	24.48	218.58	31.65	179.02	149.29	241.9	22.36	199.7	162.77	270.64	26.38	182.45	13.68	217.44	28.64	148.79	18.83	341.71	211.68	144.2	6.43	0	0	0	0	0	0	0	0
20	722.39	127.02	113.95	140.1	6.67	125.42	46.82	6.99	21.2	4.73	63.5	8.64	26.73	5.36	177.29	24.07	218.73	29.94	181.15	152.01	242.46	21.85	200.26	164.62	268.53	25.42	185.75	13.48	220.1	28.05	152.07	18.7	5252.87	213.31	147.24	6.45	0	0	0	0	0	0	0	0
21	758.51	130.14	116.92	143.35	6.74	128.82	47.44	6.94	21.58	4.47	63.87	8.51	27.53	5.17	180.79	23.39	220.25	29.44	184.6	155.6	245.21	21.67	202.8	167.72	269.7	24.96	189.65	13.5	223.77	27.47	155.79	17.47	321.44	214.89	150.14	6.46	0	0	0	0	0	0	0	0
22	794.63	133.13	119.79	146.48	6.81	131.31	47.93	6.97	21.83	4.25	64.24	8.33	27.71	4.93	183.3	23.02	221.58	28.9	187.17	158.26	247.3	21.55	205.45	170.38	272.22	24.94	192.63	13.4	227.04	27.36	158.52	17.59	290.27	216.41	152.94	6.47	0	0	0	0	0	0	0	0
23	830.75	136.02	122.55	149.49	6.87	134.45	48.63	6.82	22.09	4.46	65.01	8.04	27.78	5.01	186.93	22.4	223.89	27.88	191.38	162.01	252.24	21.85	210.28	174.51	278.16	25.39	196.63	13.48	231.78	26.44	162.02	17.03	607.01	217.89	155.62	6.49	0	0	0	0	0	0	0	0
24	866.87	138.81	125.23	152.39	6.93	137.51	49.5	6.7	22.42	4.28	65.82	7.61	27.86	4.98	190.91	21.82	226.92	25.9	195.45	165.74	256.6	22.02	214.95	178.55	283.8	25.79	200.59	13.5	236.49	25.11	165.45	16.44	537.76	219.31	158.21	6.5	0	0	0	0	0	0	0	0
25	902.99	141.5	127.82	155.19	6.98	139.98	50.11	7.01	22.52	4.4	66.27	7.92	27.98	5.18	193.66	22.67	228.33	26.28	199.32	168.98	261.6	22.45	218.71	181.78	288.44	26.14	203.6	13.37	239.9	26.26	168.16	16.78	743.42	220.7	160.71	6.5	0	0	0	0	0	0	0	0
26	939.11	144.11	130.32	157.9	7.03	142.95	50.76	7.28	22.45	4.28	66.88	8.32	27.87	4.53	197	23.57	230.18	27.66	204.03	172.9	267.74	23	222.89	185.55	293.14	26.38	207.26	13.2	244.3	27.44	171.4	17.2	329.51	222.05	163.12	6.51	0	0	0	0	0	0	0	0
27	975.23	146.63	132.76	160.51	7.08	145.15	51.09	7.28	22.81	4.33	66.96	8.47	28.23	4.53	199.38	23.54	231.04	27.97	205.85	175.01	268.76	22.75	224.73	187.58	294.59	26.24	209.63	13.13	246.5	28.04	173.72	17.22	300.24	223.36	165.46	6.52	0	0	0	0	0	0	0	0
28	1011.35	149.08	135.12	163.05	7.12	146.83	51.29	7.04	23.05	4.32	66.96	8.41	28.52	4.86	201.01	22.81	231.55	27.71	207.09	176.51	269.38	22.54	225.9	189.02	295.21	26.04	211.4	12.99	248.07	27.75	175.49	16.94	285.99	224.63	167.72	6.52	0	0	0	0	0	0	0	0
29	1047.47	151.46	137.41	165.5	7.17	149.63	51.88	7.2	23.52	4.66	67.66	8.58	29.02	5.02	204.1	23	234.76	28.51	210.28	179.64	272.42	22.53	229.48	192.37	298.95	26.15	214.96	13.04	251.9	28.23	178.65	16.96	277.59	225.88	169.91	6.53	0	0	0	0	0	0	0	0
30	1083.59	153.77	139.65	167.88	7.2	152.61	52.82	7.21	23.63	5.18	68.73	8.54	29	5.08	208.21	22.8	238.73	28.16	216.26	184.19	281.09	23.54	235.33	197.05	306.74	26.92	219.05	13.21	257.06	27.9	182.06	16.64	380.84	227.09	172.04	6.53	0	0	0	0	0	0	0	0
31	1119.71	156.01	141.82	170.2	7.24	154.92	53.09	7.11	23.95	5.17	68.74	8.24	29.66	4.99	210.56	21.97	239.46	26.67	218.51	186.54	282.97	23.43	235.77	198.43	305.28	26.23	221.44	13.26	258.93	26.78	184.49	15.76	306.05	228.27	174.11	6.54	0	0	0	0	0	0	0	0
32	1155.83	158.19	143.94	172.45	7.27	157.2	53.77	6.99	24.17	4.96	69.41	8.03	29.81	4.89	213.72	21.85	241.99	26.38	221.25	189.21	285.56	23.43	239.13	201.41	309.16	26.46	224.44	13.25	262.47	26.14	187.07	15.37	288.65	229.43	176.12	6.54	0	0	0	0	0	0	0	0
33	1191.95	160.32	146	174.64	7.31	159.44	54.11	7.1	24.13	4.64	69.79	8.26	29.72	4.77	216.1	21.99	243.96	27.2	223.95	191.76	288.34	23.5	242.78	204.46	313.8	26.86	227.12	13.2	265.63	26.3	189.48	14.93	280.82	230.56	178.07	6.54	0	0	0	0	0	0	0	0
34	1228.07	162.4	148.02	176.77	7.34	161.59	54.48	7.07	24.5	4.93	70.13	8.29	30	4.93	218.6	21.36	245.41	26.79	226.21	194.03	290.48	23.47	245.14	206.8	316.12	26.86	229.66	13.22	268.28	26.16	191.82	14.65	276.44	231.67	179.98	6.54	0	0	0	0	0	0	0	0
35	1264.19	164.42	149.99	178.85	7.36	163.51	54.73	7	24.74	4.83	70.21	7.98	30.22	4.99	220.72	20.99	246.31	25.39	227.98	195.95	291.77	23.33	246.55	208.45	317.09	26.69	231.71	13.11	270.26	25.08	193.83	14.39	273.51	232.76	181.83	6.55	0	0	0	0	0	0	0	0
36	1300.31	166.39	151.91	180.88	7.39	165.32	55.11	7.17	24.61	4.8	70.36	7.91	30.4	5.1	222.88	21.09	247.46	24.8	231.05	198.45	295.88	23.72	248.36	210.29	318.8	26.66	233.73	13.1	272.29	24.59	195.74	14.21	271.44	233.82	183.64	6.55	0	0	0	0	0	0	0	0
37	1336.43	168.32	153.78	182.85	7.42	166.91	55.26	7.35	24.7	4.78	70.4	7.96	30.69	5.33	224.32	21.39	248.47	24.87	232.83	200.18	297.69	23.75	249.62	211.7	319.74	26.55	235.41	13.02	273.78	24.71	197.41	14.17	269.77	234.86	185.4	6.55	0	0	0	0	0	0	0	0
38	1372.55	170.2	155.62	184.78	7.44	168.59	55.37	7.05	24.9	4.62	70.51	7.89	30.89	5.32	225.57	20.42	249.46	24.27	233.85	201.56	297.93	23.47	251.03	213.27	320.83	26.43	237.24	12.96	275.57	24.06	199.19	13.62	268.57	235.88	187.12	6.55	0	0	0	0	0	0	0	0
39	1408.67	172.04	157.42	186.67	7.46	170.33	55.61	6.96	25.08	4.84	70.68	7.84	31.09	5.15	227.29	20.33	250.88	24.16	235.91	203.48	300.23	23.57	252.48	214.91	321.82	26.27	239.2	12.84	277.53	24.21	201.04	13.67	267.54	236.89	188.81	6.55	0	0	0	0	0	0	0	0
40	1444.79	173.85	159.18	188.51	7.48	172.5	56.24	6.9	25.22	4.85	71.17	7.79	31.19	5.39	230.23	20.19	253.35	23.73	239.16	206.31	304.11	23.83	255.87	217.81	326.03	26.6	241.89	12.86	280.63	24.24	203.43	13.51	266.89	237.87	190.45	6.55	0	0	0	0	0	0	0	0
41	1480.91	175.61	160.9	190.31	7.5	173.9	56.37	6.91	25.34	4.86	71.16	7.79	31.26	5.25	231.8	20.06	254.1	23.78	240.64	207.76	305.6	23.84	256.93	219.04	326.74	26.48	243.32	12.77	282.02	24.2	204.86	13.29	266.28	238.84	192.06	6.55	0	0	0	0	0	0	0	0
42	1517.03	177.33	162.59	192.08	7.52	175.47	56.68	6.86	25.57	4.95	71.42	7.79	31.51	5.15	233.63	19.85	255.58	23.62	242.21	209.4	306.9	23.77	258.21	220.55	327.44	26.28	245.19	12.69	283.93	24.32	206.57	13.42	265.76	239.79	193.63	6.54	0	0	0	0	0	0	0	0
43	1553.15	179.02	164.25	193.8	7.54	177.28	57.03	6.84	25.73	5.27	71.78	7.62	31.48	5.26	235.66	19.74	257.56	23.25	244.8	211.65	310.08	24	260.96	222.91	330.85	26.54	247.39	12.63	286.53	23.91	208.54	13.4	265.37	240.73	195.17	6.54	0	0	0	0	0	0	0	0
44	1589.27	180.68	165.87	195.5	7.56	178.95	57.24	6.84	25.82	5.4	72.1	7.75	31.49	5.35	237.29	19.71	259.34	23.49	246.85	213.53	312.43	24.11	263.71	225.19	334.43	26.86	249.41	12.62	288.87	24.21	210.35	13.56	265.05	241.65	196.68	6.54	0	0	0	0	0	0	0	0
45	1625.39	182.31	167.46	197.15	7.57	180.77	57.73	6.88	25.76	5.34	72.58	7.6	31.48	5.4	239.91	19.76	261.67	23.08	250.04	216.12	316.68	24.52	266.55	227.63	337.91	27.12	251.74	12.67	291.69	23.71	212.36	13.45	264.86	242.55	198.15	6.54	0	0	0	0	0	0	0	0
46	1661.51	183.9	169.02	198.78	7.59	182.27	57.95	7.04	25.99	5.33	72.71	7.87	31.69	5.43	241.72	20.16	263	23.67	251.56	217.69	317.96	24.46	268.06	229.18	339.28	27.08	253.4	12.56	293.31	24.75	213.95	13.71	264.69	243.44	199.6	6.54	0	0	0	0	0	0	0	0
47	1697.63	185.46	170.56	200.37	7.6	184.04	58.27	7.07	26.17	5.37	73.07	7.83	31.9	5.37	243.83	20.27	265.11	23.55	253.46	219.59	319.73	24.43	269.75	231.01	340.56	26.96	255.56	12.56	295.64	24.57	215.89	13.75	264.6	244.32	201.02	6.53	0	0	0	0	0	0	0	0
48	1733.75	187	172.07	201.93	7.62	185.78	58.59	7.14	26.58	5.52	73.25	7.67	32.3	5.35	245.98	20.12	266.61	22.86	254.96	221.32	320.59	24.23	270.79	232.43	340.8	26.67	257.5	12.44	297.41	24.22	217.76	13.57	264.59	245.18	202.41	6.53	0	0	0	0	0	0	0	0
49	1769.87	188.51	173.55	203.46	7.63	187.15	58.72	7.32	26.93	5.56	73.43	7.73	32.56	5.29	247.28	20.2	268.08	23.08	255.81	222.48	320.74	23.99	271.71	233.61	341.15	26.47	259.08	12.4	298.93	24.34	219.23	13.67	264.6	246.03	203.77	6.53	0	0	0	0	0	0	0	0
50	1805.99	189.99	175	204.97	7.64	188.63	59.18	7.46	26.87	5.32	73.68	7.75	32.66	5.35	249.44	20.52	269.62	22.89	258.23	224.54	323.68	24.21	273.67	235.39	343.39	26.59	260.84	12.34	300.86	24.46	220.83	13.51	264.69	246.87	205.11	6.53	0	0	0	0	0	0	0	0
51	1842.1	191.44	176.43	206.45	7.66	189.95	59.39	7.46	26.86	5.55	73.75	7.49	32.86	5.38	250.79	20.31	270.69	22.23	260.31	226.27	326.39	24.45	274.54	236.49	343.8	26.42	262.25	12.32	302.17	23.78	222.22	13.36	264.8	247.69	206.43	6.52	0	0	0	0	0	0	0	0
52	1878.22	192.87	177.84	207.9	7.67	191.1	59.52	7.52	27.09	5.69	73.69	7.48	33.12	5.5	252.04	19.99	271.4	21.95	261.39	227.43	327.23	24.38	275.12	237.32	343.92	26.24	263.37	12.28	303.01	23.71	223.39	13.16	264.89	248.51	207.72	6.52	0	0	0	0	0	0	0	0
53	1914.34	194.27	179.22	209.32	7.68	192.32	59.66	7.79	27.23	5.91	73.64	7.8	33.41	5.77	253.4	20.37	272.36	22.46	263.13	228.93	329.39	24.54	275.9	238.32	344.27	26.08	264.57	12.19	303.9	24.59	224.64	13.17	265.01	249.31	208.99	6.52	0	0	0	0	0	0	0	0
54	1950.46	195.66	180.59	210.73	7.69	193.93	60.17	7.68	27.04	5.83	73.99	7.83	33.38	5.88	255.53	20	274.33	22.16	266.4	231.45	334.04	25.07	278.59	240.56	347.73	26.38	266.55	12.16	306.26	24.3	226.4	12.89	265.19	250.1	210.23	6.51	0	0	0	0	0	0	0	0
55	1986.58	197.02	181.93	212.11	7.7	195.43	60.53	7.37	27.13	5.68	74.24	7.6	33.44	5.75	257.39	19.3	276.13	21.64	268.06	233.1	335.61	25.05	280.44	242.28	349.77	26.47	268.32	12.13	308.23	23.71	228.02	12.7	265.39	250.88	211.46	6.51	0	0	0	0	0	0	0	0
56	2022.7	198.35	183.25	213.46	7.71	196.75	60.84	7.26	27.07	5.57	74.43	7.44	33.44	5.78	259.01	18.83	277.68	21.24	270.16	234.86	338.27	25.28	282.07	243.79	351.6	26.55	269.85	12.12	309.96	22.95	229.43	12.63	265.61	251.65	212.66	6.51	0	0	0	0	0	0	0	0
57	2058.82	199.67	184.54	214.79	7.72	198.29	60.89	7.22	27.35	5.82	74.63	7.27	33.74	6.1	260.22	18.77	279.34	21.02	271.4	236.25	339.24	25.17	283.49	245.27	352.89	26.5	271.61	12.11	311.65	22.5	231.1	12.93	265.88	252.41	213.85	6.5	0	0	0	0	0	0	0	0
58	2094.94	200.97	185.82	216.11	7.73	199.62	61.15	6.94	27.41	5.84	74.87	7.17	33.87	5.95	261.51	18.46	280.77	20.86	272.95	237.71	340.91	25.23	284.64	246.56	353.7	26.38	273.2	12.09	313.36	22.07	232.55	12.99	266.14	253.16	215.01	6.5	0	0	0	0	0	0	0	0
59	2131.06	202.24	187.08	217.4	7.73	201	61.46	7.02	27.49	5.8	75.2	7.39	33.95	6.05	263.26	18.88	282.62	21.58	274.77	239.39	342.88	25.31	286.74	248.4	356.22	26.56	274.93	12.09	315.34	22.93	234.07	13.33	266.43	253.9	216.16	6.49	0	0	0	0	0	0	0	0
60	2167.18	203.5	188.33	218.67	7.74	202.23	61.83	7.17	27.45	5.54	75.38	7.37	34.03	5.93	264.91	19.18	283.98	21.38	276.73	241.09	345.18	25.46	288.01	249.7	357.33	26.51	276.35	12.08	316.88	22.58	235.39	13.08	266.73	254.63	217.29	6.49	0	0	0	0	0	0	0	0
61	2203.3	204.74	189.55	219.92	7.75	203.75	62.06	7.09	27.75	5.17	75.51	7.26	34.28	5.66	266.54	19.29	285.48	21.37	277.41	242.26	344.73	25.07	288.93	250.94	357.62	26.28	278.02	12.05	318.45	22.42	237.01	13.07	267.08	255.35	218.4	6.49	0	0	0	0	0	0	0	0
62	2239.42	205.96	190.76	221.16	7.75	205.11	62.28	7.05	28.08	5.33	75.68	7.14	34.34	5.68	268.2	19.22	286.8	20.9	278.79	243.66	346.02	25.04	290.66	252.52	359.6	26.38	279.57	12.03	320.12	22.26	238.45	12.87	267.44	256.07	219.5	6.48	0	0	0	0	0	0	0	0
63	2275.54	207.16	191.95	222.37	7.76	206.27	62.35	7.17	28.22	5.42	75.66	7.21	34.42	5.78	269.29	19.57	287.6	20.93	279.88	244.82	346.96	25	291.7	253.61	360.54	26.35	280.73	11.96	321.2	22.55	239.64	12.98	267.8	256.77	220.58	6.48	0	0	0	0	0	0	0	0
64	2311.66	208.34	193.12	223.57	7.77	207.47	62.75	6.86	28.27	5.32	76	7.03	34.32	5.64	270.95	18.88	289.19	20.52	281.52	246.33	348.69	25.06	293.72	255.32	363.01	26.54	282.28	11.98	323.19	22.35	240.96	12.97	268.18	257.47	221.64	6.47	0	0	0	0	0	0	0	0
65	2347.78	209.51	194.28	224.75	7.77	208.83	62.82	6.79	28.71	5.32	76.18	6.81	34.42	5.46	272.38	18.56	290.51	20.07	281.83	247.19	347.85	24.64	295.01	256.69	364.08	26.47	283.84	11.97	324.83	22.02	242.41	12.93	268.57	258.15	222.69	6.47	0	0	0	0	0	0	0	0
66	2383.9	210.67	195.42	225.91	7.78	210.01	62.97	6.67	28.75	5.19	76.32	6.6	34.47	5.55	273.51	18.16	291.63	19.42	283.24	248.51	349.37	24.69	296.45	258.03	365.67	26.53	285.17	11.96	326.27	21.43	243.66	12.62	268.96	258.83	223.72	6.46	0	0	0	0	0	0	0	0
67	2420.02	211.8	196.55	227.06	7.78	211.1	63.09	6.72	28.68	5.2	76.32	6.89	34.52	5.59	274.6	18.55	292.59	20.29	284.63	249.78	350.96	24.77	297.48	259.1	366.63	26.5	286.28	11.9	327.34	22.1	244.78	12.88	269.35	259.5	224.74	6.46	0	0	0	0	0	0	0	0
68	2456.14	212.92	197.66	228.19	7.79	212.19	63.25	6.69	28.64	5.12	76.37	6.8	34.57	5.57	275.78	18.11	293.58	19.53	286.09	251.1	352.64	24.87	298.56	260.2	367.64	26.48	287.44	11.89	328.51	21.5	245.9	12.33	269.75	260.17	225.74	6.45	0	0	0	0	0	0	0	0
69	2492.26	214.03	198.76	229.3	7.79	213.32	63.44	6.57	28.75	5.26	76.39	6.65	34.76	5.59	277.15	18.16	294.57	19.35	287.41	252.35	354.03	24.9	299.1	261.02	367.65	26.28	288.6	11.86	329.52	20.89	247.08	12.31	270.16	260.82	226.73	6.45	0	0	0	0	0	0	0	0
70	2528.38	215.12	199.84	230.4	7.8	214.45	63.7	6.66	28.58	5.42	76.61	6.97	34.75	5.58	278.59	18.49	296.1	20.03	289.84	254.18	357.6	25.33	300.94	262.58	369.93	26.46	289.97	11.84	331.12	21.75	248.3	12.51	270.56	261.47	227.7	6.44	0	0	0	0	0	0	0	0
71	2564.5	216.2	200.91	231.49	7.8	215.62	64.16	6.58	28.55	5.45	77.02	6.83	34.74	5.6	280.34	18.58	297.93	19.97	292.22	256.04	360.85	25.67	303.11	264.36	372.74	26.72	291.56	11.88	333.13	21.38	249.62	12.35	270.98	262.11	228.67	6.44	0	0	0	0	0	0	0	0
72	2600.62	217.26	201.97	232.56	7.8	216.73	64.17	6.52	28.82	5.49	77.06	6.95	34.86	5.61	281.37	18.59	298.88	20.09	292.51	256.75	360.32	25.37	304.01	265.37	373.43	26.64	292.72	11.84	334.22	21.68	250.78	12.54	271.41	262.75	229.62	6.43	0	0	0	0	0	0	0	0
73	2636.74	218.31	203.01	233.62	7.81	217.77	64.29	6.57	28.85	5.29	77.12	6.91	34.8	5.5	282.51	18.73	299.85	20.19	293.58	257.84	361.29	25.35	305.16	266.49	374.6	26.66	293.83	11.85	335.46	21.48	251.85	12.63	271.82	263.38	230.56	6.43	0	0	0	0	0	0	0	0
74	2672.86	219.35	204.04	234.66	7.81	218.83	64.19	6.81	29.14	5.57	76.94	7.2	35.15	5.71	283.17	19.31	300.45	21	293.96	258.54	361.05	25.11	305.24	267.01	373.9	26.36	294.73	11.79	335.86	22.62	252.9	13.06	272.24	264	231.48	6.42	0	0	0	0	0	0	0	0
75	2708.98	220.38	205.06	235.69	7.82	219.99	64.42	6.75	29	5.55	77.2	7	34.93	5.66	284.49	19.04	301.9	20.58	295.96	260.16	363.74	25.38	307.44	268.76	376.87	26.66	296.16	11.77	337.76	21.87	254.15	12.8	272.67	264.61	232.4	6.42	0	0	0	0	0	0	0	0
76	2745.1	221.39	206.06	236.71	7.82	220.94	64.52	6.67	29.01	5.25	77.25	6.98	35.01	5.42	285.44	18.74	302.8	20.38	296.83	261.1	364.43	25.32	308.14	269.6	377.3	26.56	297.17	11.75	338.76	21.72	255.14	12.73	273.09	265.22	233.3	6.41	0	0	0	0	0	0	0	0
77	2781.22	222.39	207.06	237.72	7.82	221.65	64.43	6.84	29.06	5.16	77.01	7.18	35.28	5.38	285.84	18.93	303.01	20.65	297.15	261.61	364.37	25.18	307.73	269.67	376.01	26.22	297.66	11.72	338.76	21.97	255.8	12.75	273.51	265.82	234.19	6.41	0	0	0	0	0	0	0	0
78	2817.34	223.38	208.04	238.71	7.82	222.44	64.5	6.61	29.05	4.97	76.98	7.02	35.42	5.38	286.48	18.38	303.64	20.34	297.77	262.34	364.75	25.1	308.16	270.26	376.17	26.11	298.43	11.7	339.38	21.63	256.61	12.58	273.91	266.42	235.07	6.4	0	0	0	0	0	0	0	0
79	2853.46	224.35	209.01	239.69	7.83	223.51	64.72	6.58	29.21	4.98	77.14	7.01	35.7	5.54	287.73	18.39	304.8	20.51	298.89	263.47	365.77	25.07	308.97	271.22	376.66	26	299.67	11.67	340.51	21.59	257.77	12.65	274.31	267.01	235.94	6.4	0	0	0	0	0	0	0	0
80	2889.58	225.32	209.97	240.66	7.83	224.56	64.68	6.62	29.48	4.92	77.12	7.04	35.83	5.48	288.57	18.58	305.64	20.54	299.24	264.17	365.45	24.82	309.69	272.1	377.06	25.89	300.72	11.64	341.42	21.89	258.85	12.66	274.73	267.59	236.8	6.39	0	0	0	0	0	0	0	0
81	2925.7	226.27	210.92	241.62	7.83	225.63	64.97	6.82	29.53	4.97	77.31	7.21	35.82	5.59	290.14	18.72	306.99	20.86	300.96	265.64	367.55	24.98	311.46	273.58	379.32	26.08	301.99	11.65	342.89	22.07	260	12.45	275.15	268.17	237.65	6.39	0	0	0	0	0	0	0	0
82	2961.82	227.21	211.86	242.56	7.83	226.73	65.29	6.87	29.54	5.13	77.55	7.27	36.03	5.57	291.7	18.57	308.38	21.09	303.03	267.29	370.33	25.26	312.69	274.8	380.49	26.07	303.33	11.7	344.28	22.09	261.22	12.27	275.58	268.74	238.49	6.38	0	0	0	0	0	0	0	0
83	2997.94	228.15	212.79	243.5	7.83	227.56	65.3	6.79	29.48	4.93	77.52	7.27	35.89	5.69	292.28	18.27	308.94	20.82	303.83	268.11	371.1	25.25	313.98	275.87	382.23	26.23	304.15	11.65	345.2	22.1	262.03	12.04	276.01	269.31	239.32	6.38	0	0	0	0	0	0	0	0
84	3034.05	229.07	213.71	244.43	7.84	228.4	65.26	6.72	29.63	4.96	77.42	7.27	36.1	5.56	292.88	17.97	309.48	20.78	304.2	268.71	371.03	25.09	314.07	276.3	381.7	26	304.9	11.59	345.66	22.15	262.88	11.78	276.44	269.87	240.14	6.37	0	0	0	0	0	0	0	0
85	3070.17	229.98	214.62	245.34	7.84	229.11	65.21	6.84	29.72	4.91	77.31	7.24	36.12	5.48	293.4	18.11	309.74	20.46	304.65	269.28	371.25	25	314.29	276.73	381.54	25.85	305.51	11.55	346.15	21.96	263.56	11.7	276.85	270.43	240.95	6.37	0	0	0	0	0	0	0	0
86	3106.29	230.88	215.52	246.25	7.84	230.05	65.25	6.76	29.67	4.86	77.3	7.29	36.21	5.5	294.15	18.07	310.59	20.7	305.5	270.18	372.01	24.97	314.92	277.5	381.9	25.75	306.45	11.52	347	21.84	264.52	11.62	277.26	270.98	241.76	6.36	0	0	0	0	0	0	0	0
87	3142.41	231.78	216.41	247.14	7.84	231.02	65.35	6.74	29.63	4.87	77.26	7.31	36.39	5.38	295.11	17.79	311.3	20.54	306.8	271.33	373.54	25.06	315.34	278.18	381.84	25.57	307.39	11.5	347.74	21.72	265.51	11.42	277.68	271.52	242.55	6.35	0	0	0	0	0	0	0	0
88	3178.53	232.66	217.29	248.03	7.84	232	65.45	6.84	29.92	4.84	77.36	7.33	36.66	5.43	296.27	18	312.43	20.54	307.32	272.11	373.51	24.87	315.95	278.99	382.06	25.43	308.48	11.47	348.67	21.72	266.56	11.41	278.1	272.06	243.34	6.35	0	0	0	0	0	0	0	0
89	3214.65	233.53	218.16	248.9	7.84	232.86	65.56	6.72	30.04	4.79	77.5	7.26	36.68	5.31	297.17	17.46	313.55	20.35	308.04	272.93	374.01	24.79	316.97	279.96	383.11	25.45	309.49	11.46	349.8	21.63	267.48	11.42	278.52	272.6	244.11	6.34	0	0	0	0	0	0	0	0
90	3250.77	234.4	219.03	249.77	7.84	233.56	65.58	6.51	30.03	4.84	77.45	7.14	36.58	5.34	297.65	16.91	313.91	19.87	308.91	273.69	375.12	24.87	317.77	280.7	384.04	25.49	310.15	11.44	350.51	21.31	268.16	11.29	278.93	273.13	244.88	6.34	0	0	0	0	0	0	0	0
91	3286.89	235.25	219.88	250.62	7.84	234.41	65.67	6.64	30	4.7	77.46	7.28	36.58	5.22	298.41	17.36	314.57	20.16	309.92	274.65	376.17	24.9	318.57	281.54	384.75	25.46	311.02	11.4	351.4	21.86	269.03	11.37	279.33	273.66	245.64	6.33	0	0	0	0	0	0	0	0
92	3323.01	236.1	220.73	251.47	7.84	235.37	65.76	6.81	30.11	4.83	77.5	7.31	36.76	5.13	299.41	17.81	315.54	20.37	310.98	275.69	377.22	24.9	319.13	282.3	384.92	25.31	312.03	11.36	352.28	22.04	270.03	11.41	279.74	274.18	246.4	6.32	0	0	0	0	0	0	0	0
93	3359.13	236.94	221.56	252.31	7.84	236.29	65.97	6.66	30.16	4.86	77.65	7.08	36.81	5.02	300.57	17.41	316.38	19.95	312.28	276.84	378.78	25.01	320.11	283.28	385.87	25.31	313.11	11.33	353.46	21.53	271.01	11.27	280.15	274.7	247.14	6.32	0	0	0	0	0	0	0	0
94	3395.25	237.77	222.39	253.14	7.84	237.26	66.09	6.88	30.18	4.92	77.82	7.19	36.84	5.01	301.56	17.7	317.48	20.25	313.66	278.05	380.41	25.11	321.44	284.48	387.39	25.39	314.25	11.34	354.75	21.62	272.06	11.24	280.56	275.21	247.88	6.31	0	0	0	0	0	0	0	0
95	3431.37	238.59	223.21	253.96	7.84	238.25	66.3	6.85	30.17	4.95	77.95	7.08	36.86	4.98	302.62	17.45	318.42	19.8	315.16	279.35	382.25	25.25	322.57	285.57	388.58	25.42	315.38	11.33	355.99	21.26	273.11	11.18	280.98	275.72	248.61	6.31	0	0	0	0	0	0	0	0
96	3467.49	239.4	224.03	254.78	7.84	239.09	66.24	6.94	30.14	4.95	77.89	7.2	36.92	4.84	303.11	17.49	318.93	19.95	315.9	280.13	382.93	25.22	323.07	286.23	388.79	25.31	316.17	11.3	356.67	21.51	273.95	11.13	281.4	276.22	249.33	6.3	0	0	0	0	0	0	0	0
97	3503.61	240.21	224.83	255.58	7.84	239.81	66.26	6.89	30.17	4.99	77.87	7.14	37.02	4.8	303.67	17.28	319.37	19.66	316.56	280.82	383.52	25.19	323.59	286.83	389.13	25.24	316.88	11.27	357.26	21.38	274.68	10.96	281.81	276.72	250.05	6.29	0	0	0	0	0	0	0	0
98	3539.73	241.01	225.63	256.38	7.84	240.71	66.45	7.05	30.24	5.08	78.02	7.22	36.99	4.77	304.86	17.58	320.42	19.82	318.07	282.07	385.5	25.38	324.8	287.93	390.52	25.31	317.93	11.26	358.5	21.52	275.65	11.07	282.23	277.21	250.76	6.29	0	0	0	0	0	0	0	0
99	3575.85	241.8	226.42	257.17	7.84	241.65	66.73	7.16	30.15	5.02	78.2	7.34	37.04	4.64	306.28	17.63	321.61	19.8	319.92	283.53	387.99	25.63	326.04	289.08	391.86	25.37	319.06	11.24	359.76	21.87	276.66	10.93	282.64	277.7	251.46	6.28	0	0	0	0	0	0	0	0
100	3611.97	242.58	227.2	257.95	7.84	242.52	66.82	7.1	30.31	4.96	78.24	7.3	37.06	4.72	307.12	17.26	322.36	19.44	320.57	284.31	388.39	25.54	327	290	392.89	25.39	319.98	11.2	360.7	21.49	277.56	10.7	283.07	278.19	252.15	6.28	0	0	0	0	0	0	0	0
101	3648.09	243.35	227.98	258.73	7.84	243.2	66.77	7.16	30.44	4.7	78.09	7.36	37.22	4.67	307.64	17.38	322.72	19.46	320.42	284.58	387.37	25.23	326.89	290.24	392.17	25.16	320.52	11.16	360.94	21.41	278.21	10.57	283.48	278.67	252.84	6.27	0	0	0	0	0	0	0	0
102	3684.21	244.12	228.75	259.5	7.84	244.15	66.88	6.96	30.36	4.6	78.11	7.15	37.32	4.9	308.43	16.69	323.47	18.74	321.68	285.7	388.87	25.32	327.71	291.11	392.92	25.13	321.49	11.16	361.85	20.6	279.19	10.26	283.9	279.15	253.53	6.26	0	0	0	0	0	0	0	0
103	3720.33	244.88	229.51	260.26	7.84	244.83	66.69	6.86	30.57	4.58	77.92	7.12	37.46	4.73	308.59	16.55	323.68	18.7	321.27	285.79	387.56	24.98	327.56	291.31	392.15	24.89	321.99	11.12	362.03	20.36	279.83	10.19	284.32	279.63	254.2	6.26	0	0	0	0	0	0	0	0
104	3756.45	245.64	230.26	261.01	7.84	245.64	66.8	6.83	30.55	4.58	77.94	7.05	37.47	4.83	309.31	16.46	324.27	18.22	322.37	286.76	388.86	25.06	328.56	292.21	393.34	24.96	322.83	11.09	362.88	20.43	280.65	9.94	284.73	280.1	254.87	6.25	0	0	0	0	0	0	0	0
105	3792.57	246.38	231.01	261.76	7.84	246.5	67	6.82	30.42	4.65	78.12	6.99	37.37	4.93	310.32	16.58	325.35	18.25	324.1	288.1	391.32	25.34	330.05	293.44	395.27	25.13	323.88	11.07	364.2	20.47	281.57	10.07	285.15	280.57	255.54	6.24	0	0	0	0	0	0	0	0
106	3828.69	247.12	231.75	262.5	7.84	247.05	67.01	6.82	30.44	4.64	78.04	7.02	37.48	4.96	310.77	16.37	325.56	18.08	324.63	288.64	391.83	25.33	330.27	293.8	395.26	25.04	324.35	11.05	364.5	20.32	282.1	9.97	285.55	281.03	256.19	6.24	0	0	0	0	0	0	0	0
107	3864.81	247.86	232.49	263.23	7.84	247.74	67.13	6.88	30.46	4.64	78.13	7.02	37.51	5.04	311.62	16.79	326.26	18.33	325.5	289.45	392.78	25.36	331.1	294.57	396.19	25.08	325.14	11.04	365.35	20.43	282.83	10.25	285.95	281.49	256.85	6.23	0	0	0	0	0	0	0	0
108	3900.93	248.59	233.22	263.96	7.84	248.53	67.33	6.96	30.37	4.76	78.21	6.94	37.42	5.06	312.68	17.07	326.96	18.38	327.15	290.72	395.14	25.63	332.29	295.59	397.68	25.19	326.02	11.01	366.39	20.34	283.65	10.3	286.35	281.95	257.49	6.22	0	0	0	0	0	0	0	0
109	3937.05	249.31	233.94	264.68	7.84	249.25	67.59	6.85	30.32	4.73	78.38	6.63	37.41	4.94	313.66	16.69	327.76	17.5	328.53	291.83	396.93	25.8	333.19	296.43	398.64	25.23	326.91	11	367.47	19.57	284.44	10.22	286.74	282.4	258.13	6.22	0	0	0	0	0	0	0	0
110	3973.17	250.02	234.66	265.39	7.84	249.84	67.41	6.75	30.31	4.81	78.12	6.54	37.58	4.91	313.81	16.43	327.74	17.25	328.78	292.2	397.02	25.73	332.86	296.47	397.69	24.98	327.25	10.94	367.39	19.21	284.96	10.07	287.13	282.85	258.77	6.21	0	0	0	0	0	0	0	0
111	4009.29	250.73	235.37	266.1	7.84	250.64	67.51	6.75	30.32	4.68	78.23	6.53	37.43	4.97	314.58	16.33	328.47	17.15	329.68	293.07	397.92	25.74	334.31	297.65	399.63	25.17	328.17	10.94	368.56	19.31	285.8	10.03	287.52	283.3	259.4	6.2	0	0	0	0	0	0	0	0
112	4045.41	251.43	236.07	266.8	7.84	251.49	67.81	6.71	30.3	4.6	78.5	6.49	37.41	5.04	315.78	16.12	329.56	16.92	331.16	294.31	399.79	25.9	335.85	298.92	401.61	25.35	329.29	10.98	369.98	19.09	286.75	9.7	287.92	283.74	260.02	6.2	0	0	0	0	0	0	0	0
113	4081.53	252.13	236.77	267.49	7.84	252	67.84	6.67	30.41	4.61	78.51	6.39	37.5	5.15	316.33	15.94	330.05	16.76	331.47	294.73	399.88	25.82	336.25	299.36	401.92	25.31	329.82	10.96	370.43	18.82	287.27	9.58	288.31	284.18	260.64	6.19	0	0	0	0	0	0	0	0
114	4117.65	252.82	237.46	268.18	7.84	252.58	67.76	6.42	30.51	4.59	78.42	6.23	37.6	5.03	316.63	15.45	330.34	16.25	331.5	295	399.5	25.66	336.32	299.65	401.6	25.16	330.31	10.93	370.74	18.31	287.83	9.39	288.69	284.61	261.26	6.18	0	0	0	0	0	0	0	0
115	4153.77	253.51	238.15	268.87	7.84	253.21	67.85	6.31	30.52	4.47	78.48	6.09	37.47	4.89	317.4	15.42	330.95	15.96	332.06	295.6	399.91	25.61	337.2	300.42	402.66	25.23	331.01	10.94	371.63	17.92	288.47	9.39	289.07	285.05	261.87	6.18	0	0	0	0	0	0	0	0
116	4189.89	254.19	238.83	269.54	7.83	253.88	67.73	6.52	30.74	4.34	78.35	6.33	37.67	4.91	317.85	15.92	331.4	16.46	331.74	295.76	398.68	25.27	337.29	300.77	402.31	25.06	331.55	10.89	371.86	18.47	289.13	9.47	289.45	285.48	262.47	6.17	0	0	0	0	0	0	0	0
117	4226	254.86	239.51	270.21	7.83	254.54	67.73	6.45	30.91	4.27	78.27	6.21	37.86	4.88	318.38	16.07	331.8	16.24	331.84	296.13	398.26	25.08	337.18	301	401.6	24.83	332.14	10.88	372.18	18.32	289.79	9.55	289.82	285.9	263.07	6.16	0	0	0	0	0	0	0	0
118	4262.12	255.53	240.18	270.88	7.83	255.28	67.74	6.63	31.12	4.53	78.22	6.34	38	4.97	319.06	16.55	332.14	16.56	332.39	296.78	398.63	25.01	337.61	301.57	401.77	24.73	332.84	10.83	372.69	18.87	290.53	9.7	290.2	286.33	263.66	6.15	0	0	0	0	0	0	0	0
119	4298.24	256.19	240.84	271.54	7.83	255.95	67.89	6.52	31.17	4.58	78.32	6.28	37.93	4.96	319.81	16.22	332.82	16.31	333.28	297.58	399.64	25.06	338.64	302.45	403.06	24.83	333.61	10.83	373.64	18.69	291.24	9.66	290.57	286.75	264.25	6.15	0	0	0	0	0	0	0	0
120	4334.36	256.85	241.5	272.2	7.83	256.67	68.04	6.44	31.12	4.6	78.38	6.3	37.98	5.08	320.66	15.76	333.58	15.99	334.53	298.6	401.29	25.22	339.59	303.3	404.17	24.9	334.4	10.82	374.44	18.57	291.99	9.39	290.95	287.17	264.84	6.14	0	0	0	0	0	0	0	0
121	4370.48	257.5	242.16	272.85	7.83	257.19	68.12	6.38	31.18	4.51	78.43	6.24	38.03	5	321.31	15.68	334.09	15.96	334.82	299.03	401.29	25.11	339.9	303.72	404.27	24.82	334.97	10.82	375.02	18.31	292.53	9.39	291.32	287.58	265.42	6.13	0	0	0	0	0	0	0	0
122	4406.6	258.15	242.81	273.49	7.83	257.9	68.13	6.48	31.22	4.61	78.45	6.27	38	4.95	321.97	15.63	334.67	15.73	335.66	299.82	402.22	25.15	340.79	304.53	405.28	24.87	335.71	10.8	375.8	18.33	293.26	9.19	291.68	287.99	265.99	6.13	0	0	0	0	0	0	0	0
123	4442.72	258.79	243.45	274.13	7.83	258.48	68.23	6.51	31.17	4.61	78.49	6.33	37.79	4.65	322.63	15.99	335.21	16.02	336.54	300.57	403.32	25.24	341.65	305.28	406.33	24.94	336.33	10.8	376.67	18.43	293.83	9.38	292.04	288.4	266.57	6.12	0	0	0	0	0	0	0	0
124	4478.84	259.43	244.09	274.77	7.83	259.1	68.22	6.59	31.24	4.62	78.38	6.42	38.02	4.7	323.13	16.25	335.55	16.1	337.01	301.12	403.63	25.18	341.59	305.52	405.72	24.73	336.85	10.76	376.86	18.74	294.45	9.46	292.4	288.81	267.13	6.11	0	0	0	0	0	0	0	0
125	4514.96	260.06	244.73	275.4	7.82	259.83	68.26	6.54	31.44	4.61	78.42	6.34	38.14	4.65	323.88	16.19	336.02	15.79	337.28	301.62	403.43	25.01	342.13	306.16	406.09	24.67	337.62	10.74	377.56	18.54	295.21	9.29	292.76	289.21	267.7	6.1	0	0	0	0	0	0	0	0
126	4551.08	260.69	245.36	276.02	7.82	260.52	68.39	6.49	31.48	4.52	78.54	6.31	38.13	4.65	324.75	16.29	336.76	16.03	337.98	302.35	404.03	24.98	343.04	306.99	407.11	24.72	338.44	10.71	378.51	18.88	295.94	9.45	293.12	289.61	268.25	6.1	0	0	0	0	0	0	0	0
127	4587.2	261.31	245.98	276.64	7.82	261.17	68.5	6.64	31.48	4.54	78.66	6.43	38.05	4.68	325.56	16.75	337.44	16.33	338.89	303.16	405.09	25.04	344.13	307.9	408.5	24.83	339.21	10.7	379.48	19.27	296.63	9.64	293.48	290.01	268.81	6.09	0	0	0	0	0	0	0	0
128	4623.32	261.93	246.6	277.26	7.82	261.96	68.62	6.68	31.55	4.66	78.78	6.43	38.12	4.71	326.43	16.91	338.27	16.42	339.8	304.04	406.04	25.06	344.98	308.74	409.32	24.83	340.12	10.69	380.44	19.13	297.48	9.6	293.84	290.41	269.36	6.08	0	0	0	0	0	0	0	0
129	4659.44	262.55	247.22	277.87	7.82	262.45	68.59	6.61	31.67	4.7	78.74	6.3	38.19	4.69	326.84	16.63	338.58	16.03	340.05	304.39	406.07	24.98	345.23	309.09	409.4	24.76	340.58	10.68	380.79	18.83	297.97	9.46	294.2	290.8	269.9	6.07	0	0	0	0	0	0	0	0
130	4695.56	263.15	247.83	278.48	7.82	263.15	68.76	6.36	31.75	4.68	78.87	6.14	38.23	4.75	327.7	16.09	339.34	15.5	340.75	305.12	406.68	24.95	346.09	309.9	410.34	24.8	341.41	10.66	381.72	18.37	298.72	9.27	294.55	291.19	270.45	6.07	0	0	0	0	0	0	0	0
131	4731.68	263.76	248.44	279.08	7.82	263.69	68.68	6.3	31.78	4.76	78.79	6.1	38.25	4.82	328.14	16.06	339.66	15.45	341	305.49	406.73	24.87	346.43	310.31	410.58	24.75	341.88	10.63	382.09	18.12	299.24	9.26	294.9	291.58	270.99	6.06	0	0	0	0	0	0	0	0
132	4767.8	264.36	249.04	279.68	7.82	264.3	68.75	6.39	31.86	4.79	78.8	6.2	38.34	4.91	328.77	16.25	340.17	15.67	341.66	306.14	407.38	24.87	347.01	310.91	411.12	24.74	342.5	10.61	382.64	18.55	299.87	9.36	295.25	291.96	271.52	6.05	0	0	0	0	0	0	0	0
133	4803.92	264.96	249.64	280.27	7.81	264.93	68.92	6.37	31.92	4.72	78.95	6.17	38.41	4.79	329.62	16.45	340.99	15.79	342.45	306.89	408.19	24.89	347.68	311.59	411.73	24.72	343.29	10.62	383.5	18.43	300.57	9.31	295.6	292.34	272.05	6.04	0	0	0	0	0	0	0	0
134	4840.04	265.55	250.23	280.86	7.81	265.44	68.97	6.28	31.9	4.69	78.9	6	38.48	4.71	330.12	16.16	341.27	15.35	343.04	307.45	408.82	24.91	347.81	311.89	411.58	24.61	343.75	10.6	383.85	17.96	301.07	9.22	295.95	292.72	272.58	6.04	0	0	0	0	0	0	0	0
135	4876.16	266.13	250.82	281.44	7.81	266.02	69.01	6.29	31.96	4.7	78.96	6.02	38.47	4.63	330.72	16.23	341.78	15.54	343.6	308.03	409.33	24.89	348.49	312.54	412.29	24.63	344.4	10.58	384.57	18.11	301.68	9.22	296.29	293.1	273.1	6.03	0	0	0	0	0	0	0	0
136	4912.28	266.72	251.41	282.02	7.81	266.59	68.91	6.28	32.08	4.48	78.79	6.07	38.65	4.46	331.05	16.03	341.98	15.37	343.45	308.22	408.56	24.66	348.23	312.63	411.41	24.39	344.8	10.56	384.63	17.97	302.21	9.1	296.63	293.48	273.62	6.02	0	0	0	0	0	0	0	0
137	4948.4	267.3	251.99	282.6	7.81	267.26	68.96	6.29	32.25	4.46	78.9	6.12	38.67	4.28	331.8	16.03	342.75	15.56	343.82	308.75	408.6	24.54	348.99	313.37	412.16	24.39	345.58	10.56	385.51	18.19	302.93	9.19	296.97	293.85	274.14	6.01	0	0	0	0	0	0	0	0
138	4984.52	267.87	252.57	283.17	7.81	267.86	69.11	6.39	32.11	4.45	79	6.26	38.59	4.37	332.61	16.23	343.45	15.75	345.06	309.71	410.33	24.73	350.05	314.25	413.54	24.52	346.29	10.55	386.39	18.41	303.56	9.17	297.31	294.22	274.65	6.01	0	0	0	0	0	0	0	0
139	5020.64	268.44	253.14	283.74	7.8	268.39	69.27	6.37	32.09	4.41	79.1	6.27	38.59	4.51	333.4	16.19	344.06	15.62	345.92	310.44	411.39	24.81	350.96	315	414.71	24.62	346.92	10.57	387.12	18.66	304.12	9.03	297.65	294.59	275.16	6	0	0	0	0	0	0	0	0
140	5056.76	269.01	253.71	284.3	7.8	268.79	69.21	6.41	32.17	4.48	79	6.37	38.74	4.62	333.66	16.28	344.23	15.77	346.09	310.72	411.37	24.74	350.97	315.18	414.43	24.51	347.23	10.54	387.19	19.12	304.5	9.04	297.98	294.95	275.66	5.99	0	0	0	0	0	0	0	0
141	5092.88	269.57	254.28	284.86	7.8	269.48	69.32	6.45	32.19	4.42	79.02	6.44	38.83	4.63	334.49	16.45	344.84	15.81	346.87	311.48	412.17	24.75	351.51	315.79	414.83	24.45	347.94	10.53	387.83	19.29	305.21	9	298.32	295.32	276.17	5.98	0	0	0	0	0	0	0	0
142	5129	270.13	254.84	285.42	7.8	270.05	69.42	6.37	32.11	4.59	79.06	6.42	38.72	4.67	335.22	16.3	345.33	15.86	347.96	312.32	413.71	24.92	352.41	316.54	415.99	24.56	348.55	10.51	388.6	19.32	305.8	9.11	298.65	295.68	276.66	5.97	0	0	0	0	0	0	0	0
143	5165.12	270.69	255.4	285.97	7.8	270.61	69.52	6.38	31.94	4.57	79.07	6.45	38.68	4.68	335.85	16.54	345.76	16.02	349.05	313.17	415.23	25.09	353.11	317.18	416.81	24.6	349.13	10.5	389.22	19.53	306.36	9.22	298.98	296.04	277.16	5.97	0	0	0	0	0	0	0	0
144	5201.24	271.24	255.95	286.52	7.8	271.1	69.36	6.34	32.13	4.59	78.82	6.36	38.96	4.67	336	16.23	345.79	15.72	348.73	313.21	414.26	24.84	352.47	317.01	415.35	24.28	349.37	10.47	388.95	19.22	306.79	9.08	299.3	296.4	277.65	5.96	0	0	0	0	0	0	0	0
145	5237.36	271.78	256.5	287.06	7.8	271.65	69.37	6.27	32.19	4.8	78.86	6.33	38.93	4.74	336.49	16.13	346.3	15.67	349.3	313.77	414.88	24.85	353.25	317.7	416.31	24.35	349.97	10.46	389.61	19.35	307.36	9.07	299.63	296.75	278.14	5.95	0	0	0	0	0	0	0	0
146	5273.48	272.33	257.05	287.61	7.79	272.23	69.59	6.25	32.03	4.83	78.98	6.28	38.79	4.72	337.37	16.17	346.96	15.65	350.84	314.88	417.16	25.14	354.42	318.6	417.93	24.53	350.67	10.45	390.57	19.14	307.97	9.01	299.95	297.1	278.63	5.94	0	0	0	0	0	0	0	0
147	5309.6	272.87	257.6	288.14	7.79	272.7	69.56	6.22	32.02	4.79	78.83	6.24	38.83	4.97	337.71	16.06	347.02	15.51	351.24	315.31	417.54	25.13	354.62	318.89	418.02	24.47	350.99	10.42	390.71	18.92	308.4	9	300.27	297.45	279.11	5.93	0	0	0	0	0	0	0	0
148	5345.72	273.41	258.14	288.68	7.79	273.28	69.7	6.06	32.07	4.71	78.93	6.02	38.95	4.92	338.45	15.84	347.62	15.11	351.82	315.91	418.04	25.1	355.05	319.4	418.29	24.42	351.68	10.43	391.38	18.35	309.03	8.87	300.59	297.8	279.59	5.92	0	0	0	0	0	0	0	0
149	5381.84	273.94	258.67	289.21	7.79	273.86	69.86	6.12	32.14	4.73	79.03	6.16	39.02	5.07	339.33	16.16	348.41	15.54	352.53	316.59	418.75	25.11	355.82	320.11	419.16	24.46	352.36	10.41	392.09	18.79	309.65	9.14	300.91	298.15	280.07	5.92	0	0	0	0	0	0	0	0
150	5417.96	274.47	259.2	289.73	7.79	274.43	69.94	6.2	32.03	4.73	79	6.31	39.13	5.2	340.02	16.42	348.89	15.62	353.53	317.4	420.1	25.25	356.29	320.62	419.55	24.43	352.9	10.39	392.5	19.26	310.23	9.12	301.23	298.49	280.54	5.91	0	0	0	0	0	0	0	0
151	5454.07	275	259.73	290.26	7.79	274.95	70.06	6.25	32.08	4.72	79.1	6.34	39.1	5.24	340.78	16.44	349.53	15.48	354.16	318	420.74	25.26	357.11	321.32	420.56	24.5	353.53	10.37	393.25	19.26	310.77	9.05	301.55	298.84	281.01	5.9	0	0	0	0	0	0	0	0
152	5490.19	275.52	260.26	290.78	7.79	275.42	70.21	6.31	31.94	4.69	79.16	6.36	39.03	5.24	341.45	16.66	350	15.65	355.36	318.88	422.52	25.48	357.85	321.96	421.49	24.58	354.06	10.36	393.92	19.51	311.26	9.14	301.86	299.18	281.48	5.89	0	0	0	0	0	0	0	0
153	5526.31	276.04	260.78	291.29	7.78	275.73	70.12	6.41	32.07	4.83	78.99	6.39	39.23	5.33	341.6	16.56	349.96	15.43	355.34	319.01	422.24	25.38	357.44	321.85	420.56	24.37	354.2	10.37	393.7	19.47	311.52	9.01	302.17	299.52	281.94	5.88	0	0	0	0	0	0	0	0
154	5562.43	276.56	261.3	291.81	7.78	276.26	70.22	6.5	32.1	4.89	79.04	6.41	39.31	5.24	342.31	16.82	350.51	15.57	356.14	319.7	423.23	25.45	357.82	322.31	420.75	24.31	354.79	10.35	394.25	19.68	312.08	9.14	302.48	299.85	282.41	5.87	0	0	0	0	0	0	0	0
155	5598.55	277.07	261.82	292.32	7.78	276.88	70.32	6.49	32.09	4.94	79.18	6.38	39.21	5.22	342.99	16.9	351.24	15.56	357.09	320.51	424.43	25.55	358.9	323.2	422.15	24.43	355.55	10.34	395.25	19.66	312.75	9.13	302.79	300.19	282.87	5.87	0	0	0	0	0	0	0	0
156	5634.67	277.58	262.33	292.82	7.78	277.39	70.31	6.58	32.17	4.94	79.21	6.47	39.16	5.29	343.44	16.87	351.72	15.47	357.48	320.96	424.67	25.5	359.72	323.89	423.21	24.52	356.09	10.31	395.88	19.86	313.26	9.06	303.09	300.52	283.32	5.86	0	0	0	0	0	0	0	0
157	5670.79	278.09	262.84	293.33	7.78	277.89	70.45	6.45	32.18	4.95	79.34	6.39	38.98	5.31	344.1	16.58	352.35	15.21	358.24	321.61	425.6	25.57	360.91	324.78	424.91	24.73	356.72	10.32	396.82	19.77	313.8	8.96	303.4	300.85	283.78	5.85	0	0	0	0	0	0	0	0
158	5706.91	278.59	263.35	293.83	7.78	278.48	70.61	6.41	32.26	4.81	79.53	6.34	38.86	5.27	344.91	16.43	353.17	15.06	358.83	322.24	426.09	25.54	362.1	325.73	426.52	24.89	357.51	10.34	397.91	19.6	314.45	8.96	303.7	301.18	284.23	5.84	0	0	0	0	0	0	0	0
159	5743.03	279.09	263.85	294.33	7.77	278.94	70.58	6.43	32.28	4.88	79.44	6.31	38.88	5.52	345.31	16.35	353.4	14.77	359.36	322.73	426.68	25.56	362.56	326.17	427.04	24.91	357.88	10.32	398.17	19.51	314.88	8.88	304	301.51	284.67	5.83	0	0	0	0	0	0	0	0
160	5779.15	279.59	264.35	294.82	7.77	279.35	70.55	6.31	32.34	4.9	79.43	6.15	38.89	5.4	345.68	16.15	353.76	14.44	359.51	323	426.62	25.48	362.72	326.44	426.99	24.83	358.28	10.3	398.56	19.01	315.28	8.75	304.3	301.83	285.12	5.82	0	0	0	0	0	0	0	0
161	5815.27	280.08	264.85	295.31	7.77	279.87	70.56	6.24	32.37	4.88	79.36	6.01	39.02	5.37	346.06	16.06	353.97	14.16	359.96	323.48	427.01	25.46	362.77	326.69	426.69	24.69	358.74	10.27	398.82	18.72	315.8	8.71	304.6	302.16	285.56	5.81	0	0	0	0	0	0	0	0
162	5851.39	280.57	265.34	295.8	7.77	280.35	70.74	6.23	32.22	4.88	79.48	6.1	38.88	5.42	346.82	16.02	354.6	14.19	361.19	324.39	428.8	25.68	363.96	327.58	428.43	24.9	359.34	10.28	399.68	19	316.31	8.63	304.9	302.48	286	5.8	0	0	0	0	0	0	0	0
163	5887.51	281.06	265.83	296.29	7.77	280.93	70.83	6.12	32.36	4.88	79.57	6.07	38.91	5.41	347.53	15.77	355.3	14.11	361.47	324.83	428.74	25.55	364.64	328.22	429.16	24.93	360.01	10.27	400.41	18.77	316.93	8.52	305.19	302.8	286.44	5.8	0	0	0	0	0	0	0	0
164	5923.63	281.55	266.32	296.77	7.77	281.38	70.84	6.2	32.35	5.02	79.49	6.11	38.95	5.55	347.92	16.18	355.53	14.43	362.17	325.41	429.68	25.64	364.91	328.56	429.32	24.88	360.39	10.24	400.67	19.09	317.36	8.67	305.49	303.12	286.88	5.79	0	0	0	0	0	0	0	0
165	5959.75	282.03	266.81	297.25	7.77	281.98	70.93	6.25	32.45	4.92	79.57	6.2	39.02	5.73	348.62	16.37	356.16	14.47	362.65	325.97	429.97	25.58	365.7	329.27	430.22	24.93	361.07	10.23	401.36	19.29	318	8.71	305.78	303.44	287.31	5.78	0	0	0	0	0	0	0	0
166	5995.87	282.51	267.29	297.72	7.76	282.46	70.97	6.38	32.51	4.9	79.59	6.29	39.12	5.78	349.23	16.6	356.68	14.52	363.1	326.45	430.34	25.55	366.14	329.74	430.62	24.91	361.57	10.22	401.79	19.5	318.5	8.65	306.07	303.75	287.74	5.77	0	0	0	0	0	0	0	0
167	6031.99	282.98	267.77	298.2	7.76	283.08	71.2	6.46	32.41	4.91	79.8	6.39	39.01	5.87	350.23	16.84	357.54	14.71	364.55	327.55	432.4	25.79	367.58	330.84	432.62	25.14	362.4	10.22	402.94	19.71	319.19	8.66	306.37	304.07	288.17	5.76	0	0	0	0	0	0	0	0
168	6068.11	283.46	268.25	298.67	7.76	283.67	71.32	6.62	32.48	5.13	79.94	6.51	39.11	6.07	351.03	17.2	358.38	14.96	365.67	328.43	433.92	25.95	368.52	331.65	433.78	25.22	363.13	10.23	403.71	20.22	319.84	8.54	306.66	304.38	288.59	5.75	0	0	0	0	0	0	0	0
169	6104.23	283.93	268.72	299.14	7.76	284.1	71.4	6.56	32.54	5.12	79.96	6.44	39.14	6.01	351.55	17.12	358.77	14.9	366.05	328.85	434.22	25.92	368.84	332.02	434.01	25.19	363.59	10.22	404.15	19.95	320.29	8.61	306.96	304.69	289.02	5.74	0	0	0	0	0	0	0	0
170	6140.35	284.4	269.19	299.6	7.76	284.6	71.41	6.45	32.46	5.08	79.96	6.31	39.07	5.92	351.94	16.75	359.23	14.73	366.72	329.44	435.06	25.98	369.37	332.53	434.58	25.2	364.09	10.21	404.73	19.44	320.78	8.59	307.25	305	289.44	5.73	0	0	0	0	0	0	0	0
171	6176.47	284.86	269.66	300.07	7.76	284.98	71.43	6.42	32.54	5.03	79.93	6.35	39.21	5.81	352.32	16.41	359.55	14.6	366.87	329.71	434.96	25.89	369.29	332.66	434.11	25.06	364.44	10.19	404.91	19.4	321.17	8.45	307.54	305.3	289.86	5.72	0	0	0	0	0	0	0	0
172	6212.59	285.33	270.13	300.53	7.75	285.4	71.5	6.29	32.56	5.05	79.94	6.26	39.3	5.87	352.84	16.14	359.95	14.26	367.34	330.16	435.45	25.9	369.6	333.02	434.35	25.03	364.88	10.19	405.27	19.09	321.6	8.26	307.83	305.61	290.27	5.71	0	0	0	0	0	0	0	0
173	6248.71	285.79	270.59	300.98	7.75	285.79	71.42	6.26	32.62	5.02	79.82	6.19	39.38	5.81	353.05	16.22	360.06	14.31	367.3	330.31	435.06	25.77	369.54	333.13	433.97	24.9	365.15	10.16	405.35	19.15	321.96	8.33	308.11	305.91	290.69	5.7	0	0	0	0	0	0	0	0
174	6284.83	286.24	271.05	301.44	7.75	286.23	71.45	6.27	32.62	4.98	79.86	6.39	39.37	5.94	353.5	16.27	360.5	14.64	367.65	330.71	435.3	25.73	370.3	333.76	434.97	24.99	365.63	10.15	405.88	19.82	322.42	8.36	308.4	306.21	291.1	5.7	0	0	0	0	0	0	0	0
175	6320.95	286.7	271.51	301.89	7.75	286.76	71.67	6.27	32.52	5	80.04	6.44	39.29	5.97	354.38	16.27	361.32	14.84	368.89	331.66	437.06	25.93	371.34	334.6	436.33	25.12	366.34	10.14	406.85	19.88	323	8.45	308.68	306.52	291.51	5.69	0	0	0	0	0	0	0	0
176	6357.07	287.15	271.96	302.34	7.75	287.18	71.61	6.17	32.52	5	79.95	6.32	39.25	5.92	354.64	16.07	361.51	14.59	369.21	332.01	437.34	25.91	371.67	334.95	436.66	25.12	366.68	10.14	407.13	19.72	323.39	8.38	308.96	306.81	291.92	5.68	0	0	0	0	0	0	0	0
177	6393.19	287.6	272.42	302.79	7.75	287.71	71.72	6.2	32.52	5.05	79.98	6.38	39.28	5.92	355.31	16.11	362.09	14.77	370.06	332.73	438.4	26	372.25	335.52	437.24	25.12	367.24	10.12	407.7	20.04	323.94	8.49	309.25	307.11	292.32	5.67	0	0	0	0	0	0	0	0
178	6429.31	288.05	272.87	303.23	7.75	288.18	71.82	6.24	32.48	5.1	80.02	6.42	39.36	6.04	355.95	16.17	362.55	14.77	370.94	333.44	439.59	26.12	372.74	336.01	437.73	25.12	367.75	10.11	408.17	20.14	324.43	8.46	309.53	307.41	292.72	5.66	0	0	0	0	0	0	0	0
179	6465.43	288.49	273.31	303.67	7.74	288.57	71.73	6.3	32.51	5.12	79.81	6.47	39.62	6.1	356.2	16.13	362.55	14.77	371.13	333.71	439.65	26.06	372.24	335.88	436.58	24.87	367.93	10.08	407.9	20.32	324.77	8.38	309.81	307.7	293.12	5.65	0	0	0	0	0	0	0	0
180	6501.55	288.94	273.76	304.11	7.74	289.02	71.86	6.38	32.54	5.1	79.94	6.54	39.55	5.99	356.81	16.18	363.14	14.92	371.78	334.29	440.37	26.1	372.96	336.5	437.44	24.93	368.52	10.09	408.68	20.21	325.26	8.36	310.08	308	293.52	5.64	0	0	0	0	0	0	0	0
181	6537.67	289.38	274.2	304.55	7.74	289.35	71.88	6.45	32.54	5.03	79.88	6.55	39.54	5.83	357.19	16.23	363.3	14.98	372.22	334.68	440.89	26.13	373.08	336.71	437.41	24.87	368.79	10.08	408.9	20.12	325.57	8.26	310.36	308.29	293.92	5.63	0	0	0	0	0	0	0	0
182	6573.79	289.81	274.64	304.99	7.74	289.69	71.79	6.43	32.72	5.02	79.77	6.54	39.71	5.98	357.38	16.25	363.48	14.9	371.81	334.61	439.84	25.89	372.91	336.76	436.88	24.73	369.02	10.07	408.86	19.99	325.89	8.12	310.63	308.58	294.31	5.62	0	0	0	0	0	0	0	0
183	6609.91	290.25	275.08	305.42	7.74	290.15	71.86	6.3	32.79	4.98	79.82	6.41	39.77	5.99	357.93	15.97	363.98	14.63	372.14	335.02	440.02	25.83	373.28	337.17	437.15	24.69	369.53	10.08	409.36	19.66	326.38	8	310.9	308.87	294.71	5.61	0	0	0	0	0	0	0	0
184	6646.02	290.68	275.52	305.85	7.74	290.56	71.86	6.3	32.8	5.08	79.78	6.4	39.84	6.12	358.31	16	364.27	14.63	372.61	335.47	440.54	25.85	373.57	337.51	437.37	24.66	369.91	10.07	409.63	19.85	326.79	7.99	311.17	309.16	295.1	5.6	0	0	0	0	0	0	0	0
185	6682.14	291.11	275.95	306.28	7.74	290.86	71.75	6.34	32.9	4.97	79.69	6.48	39.81	6.05	358.48	16.07	364.43	14.78	372.39	335.48	439.91	25.7	373.73	337.72	437.44	24.63	370.12	10.05	409.78	20.08	327.05	8.03	311.44	309.44	295.49	5.59	0	0	0	0	0	0	0	0
186	6718.26	291.54	276.38	306.7	7.74	291.32	71.81	6.4	32.97	4.92	79.75	6.59	39.8	6.12	359.03	16.21	365.02	14.99	372.8	335.92	440.21	25.66	374.45	338.34	438.35	24.7	370.64	10.05	410.37	20.48	327.54	8.13	311.7	309.73	295.87	5.58	0	0	0	0	0	0	0	0
187	6754.38	291.97	276.81	307.12	7.73	291.73	71.88	6.37	32.99	4.94	79.79	6.62	39.75	6.17	359.55	16.24	365.54	15.17	373.3	336.4	440.75	25.68	375.11	338.89	439.18	24.77	371.09	10.03	410.92	20.59	327.96	8.18	311.97	310.01	296.26	5.57	0	0	0	0	0	0	0	0
188	6790.5	292.39	277.23	307.55	7.73	292.19	71.97	6.34	33.05	4.84	79.9	6.56	39.82	6.11	360.15	15.9	366.12	14.87	373.73	336.86	441.07	25.64	375.56	339.36	439.57	24.75	371.67	10.04	411.53	20.3	328.46	8.03	312.23	310.29	296.64	5.56	0	0	0	0	0	0	0	0
189	6826.62	292.81	277.66	307.96	7.73	292.62	72.08	6.38	32.94	4.78	80	6.72	39.68	5.96	360.76	16.04	366.72	15.24	374.59	337.54	442.26	25.77	376.48	340.09	440.84	24.89	372.2	10.05	412.3	20.59	328.92	8.07	312.49	310.57	297.02	5.55	0	0	0	0	0	0	0	0
190	6862.74	293.23	278.08	308.38	7.73	293.07	72.15	6.43	32.97	4.83	80.08	6.82	39.57	6.01	361.29	16.17	367.17	15.35	375.14	338.06	442.85	25.79	377.37	340.79	442.04	25.01	372.73	10.05	413.02	20.85	329.39	8.17	312.76	310.85	297.4	5.54	0	0	0	0	0	0	0	0
191	6898.86	293.65	278.5	308.8	7.73	293.48	72.13	6.2	33.04	4.75	80	6.65	39.65	5.97	361.6	15.55	367.34	14.93	375.13	338.23	442.49	25.66	377.42	340.98	441.87	24.92	373.06	10.03	413.2	20.3	329.78	8.03	313.02	311.13	297.78	5.53	0	0	0	0	0	0	0	0
192	6934.98	294.06	278.92	309.21	7.73	293.98	72.29	6.15	33.05	4.78	80.14	6.65	39.64	5.9	362.43	15.4	368.05	14.77	375.95	338.93	443.52	25.74	378.12	341.62	442.63	24.95	373.7	10.04	413.99	20.05	330.33	7.93	313.28	311.41	298.15	5.52	0	0	0	0	0	0	0	0
193	6971.1	294.47	279.33	309.62	7.73	294.48	72.31	5.81	33.16	4.76	80.13	6.24	39.72	5.71	362.91	14.89	368.48	13.99	376.06	339.22	443.3	25.62	378.15	341.84	442.31	24.82	374.19	10.04	414.39	18.85	330.85	7.75	313.54	311.68	298.52	5.51	0	0	0	0	0	0	0	0
194	7007.22	294.88	279.74	310.03	7.73	294.84	72.29	5.77	33.18	4.65	80.08	6.19	39.66	5.64	363.22	14.77	368.7	13.88	376.22	339.47	443.28	25.55	378.43	342.15	442.56	24.8	374.51	10.03	414.71	18.52	331.19	7.67	313.8	311.96	298.9	5.5	0	0	0	0	0	0	0	0
195	7043.34	295.29	280.15	310.43	7.72	295.18	72.22	5.67	33.15	4.7	79.93	6.07	39.7	5.56	363.41	14.66	368.75	13.71	376.51	339.76	443.6	25.56	378.24	342.17	442.02	24.66	374.7	10.01	414.72	18.14	331.48	7.7	314.05	312.23	299.26	5.49	0	0	0	0	0	0	0	0
196	7079.46	295.7	280.56	310.84	7.72	295.75	72.38	5.7	33.23	4.74	80.13	6.05	39.62	5.56	364.24	14.77	369.57	13.76	377.34	340.49	444.58	25.62	379.32	343.06	443.4	24.78	375.47	10.02	415.77	17.92	332.11	7.57	314.31	312.5	299.63	5.48	0	0	0	0	0	0	0	0
197	7115.58	296.1	280.97	311.24	7.72	296.15	72.36	5.7	33.31	4.74	80.11	6.06	39.59	5.46	364.55	14.71	369.93	13.78	377.48	340.76	444.48	25.53	379.65	343.42	443.68	24.76	375.85	10.02	416.16	17.89	332.5	7.53	314.57	312.77	300	5.47	0	0	0	0	0	0	0	0
198	7151.7	296.51	281.37	311.64	7.72	296.61	72.43	5.72	33.22	4.7	80.12	6.16	39.57	5.42	365.05	14.76	370.33	14.1	378.26	341.39	445.51	25.62	380.2	343.93	444.31	24.79	376.33	10	416.66	18.18	332.97	7.64	314.83	313.04	300.36	5.46	0	0	0	0	0	0	0	0
199	7187.82	296.91	281.78	312.04	7.72	297.05	72.52	5.74	33.17	4.66	80.14	6.05	39.56	5.3	365.59	14.87	370.73	14.07	378.97	342	446.42	25.7	380.46	344.28	444.4	24.73	376.79	9.98	417.16	17.87	333.42	7.67	315.08	313.31	300.73	5.45	0	0	0	0	0	0	0	0
200	7223.94	297.3	282.18	312.43	7.72	297.46	72.43	5.75	33.26	4.79	80.05	6.1	39.7	5.52	365.82	14.71	370.94	14.01	379.07	342.22	446.28	25.61	380.64	344.54	444.43	24.67	377.11	9.97	417.25	18.13	333.82	7.57	315.34	313.57	301.09	5.44	0	0	0	0	0	0	0	0
201	7260.06	297.7	282.57	312.82	7.72	298.03	72.65	5.88	33.27	4.87	80.22	6.2	39.73	5.55	366.78	14.93	371.72	14.05	380.28	343.17	447.92	25.78	381.62	345.37	445.67	24.78	377.85	9.98	418.13	18.33	334.45	7.53	315.6	313.84	301.45	5.43	0	0	0	0	0	0	0	0
202	7296.18	298.09	282.97	313.22	7.72	298.41	72.63	5.83	33.37	4.91	80.18	6.21	39.71	5.41	367.16	14.8	372.06	14.04	380.38	343.4	447.8	25.7	381.87	345.67	445.82	24.74	378.19	9.98	418.46	18.25	334.82	7.52	315.86	314.1	301.8	5.42	0	0	0	0	0	0	0	0
203	7332.3	298.49	283.36	313.61	7.71	298.88	72.82	5.88	33.24	4.77	80.37	6.26	39.52	5.42	367.93	14.86	372.8	14.09	381.56	344.29	449.49	25.9	383.15	346.62	447.66	24.96	378.85	10	419.5	18.53	335.34	7.6	316.11	314.37	302.16	5.4	0	0	0	0	0	0	0	0
204	7368.42	298.88	283.76	313.99	7.71	299.35	72.81	5.83	33.27	4.88	80.35	6.19	39.52	5.4	368.33	14.54	373.19	13.79	382	344.74	449.91	25.89	383.5	347.03	447.9	24.92	379.31	9.99	419.93	18.45	335.82	7.62	316.37	314.63	302.51	5.39	0	0	0	0	0	0	0	0
205	7404.54	299.26	284.15	314.38	7.71	299.68	72.73	5.84	33.35	4.96	80.21	6.17	39.55	5.48	368.57	14.71	373.21	13.86	382	344.88	449.66	25.79	383.57	347.19	447.85	24.86	379.5	9.97	419.95	18.51	336.1	7.75	316.62	314.89	302.87	5.38	0	0	0	0	0	0	0	0
206	7440.66	299.65	284.53	314.76	7.71	300.08	72.68	5.79	33.44	5	80.13	6.07	39.66	5.45	368.85	14.71	373.44	13.75	382.08	345.1	449.49	25.69	383.48	347.31	447.39	24.72	379.82	9.95	420.09	18.22	336.49	7.7	316.87	315.15	303.22	5.37	0	0	0	0	0	0	0	0
207	7476.78	300.03	284.92	315.15	7.71	300.49	72.72	5.63	33.4	4.94	80.16	5.95	39.61	5.41	369.23	14.41	373.86	13.58	382.5	345.52	449.9	25.69	383.93	347.74	447.87	24.73	380.26	9.96	420.61	17.75	336.9	7.68	317.13	315.41	303.57	5.36	0	0	0	0	0	0	0	0
208	7512.9	300.42	285.31	315.53	7.71	300.88	72.76	5.62	33.45	4.89	80.16	5.99	39.68	5.39	369.72	14.59	374.27	13.93	382.75	345.85	449.99	25.64	384.11	348.02	447.86	24.66	380.65	9.96	420.94	18.02	337.31	7.91	317.38	315.66	303.91	5.35	0	0	0	0	0	0	0	0
209	7549.02	300.8	285.69	315.91	7.71	301.2	72.72	5.66	33.56	4.93	80.14	6.02	39.78	5.48	369.9	14.63	374.58	13.98	382.74	345.99	449.71	25.53	384.21	348.22	447.78	24.59	380.96	9.96	421.12	18.12	337.63	7.87	317.63	315.92	304.26	5.34	0	0	0	0	0	0	0	0
210	7585.14	301.18	286.07	316.28	7.71	301.6	72.73	5.65	33.6	4.9	80.11	5.95	39.83	5.33	370.3	14.61	374.89	13.81	382.98	346.31	449.8	25.48	384.24	348.42	447.52	24.48	381.33	9.96	421.41	17.82	338.03	7.84	317.88	316.18	304.6	5.33	0	0	0	0	0	0	0	0
211	7621.26	301.55	286.45	316.66	7.71	302.07	72.83	5.6	33.53	4.92	80.16	5.88	39.79	5.37	370.84	14.45	375.39	13.75	383.93	347.04	451.14	25.63	384.95	349.02	448.41	24.55	381.85	9.96	422.03	17.78	338.52	7.84	318.13	316.43	304.95	5.32	0	0	0	0	0	0	0	0
212	7657.38	301.93	286.82	317.03	7.71	302.51	72.93	5.52	33.57	4.76	80.23	5.82	39.87	5.19	371.45	14.16	375.91	13.55	384.28	347.46	451.3	25.56	385.21	349.38	448.46	24.48	382.36	9.97	422.53	17.54	338.99	7.74	318.37	316.68	305.29	5.31	0	0	0	0	0	0	0	0
213	7693.5	302.3	287.2	317.4	7.7	303	73	5.63	33.58	4.9	80.25	5.82	39.93	5.35	372	14.43	376.39	13.61	385.12	348.15	452.42	25.67	385.82	349.93	449.2	24.52	382.87	9.96	423	17.72	339.5	7.83	318.62	316.93	305.63	5.3	0	0	0	0	0	0	0	0
214	7729.62	302.67	287.57	317.77	7.7	303.37	72.96	5.54	33.61	4.82	80.19	5.76	39.95	5.37	372.23	14.27	376.62	13.45	385.22	348.36	452.31	25.59	386.05	350.21	449.35	24.49	383.19	9.95	423.24	17.63	339.85	7.73	318.87	317.19	305.97	5.28	0	0	0	0	0	0	0	0
215	7765.74	303.04	287.94	318.14	7.7	303.8	73.12	5.57	33.7	4.72	80.32	5.72	39.98	5.32	372.94	14.25	377.25	13.41	385.78	348.9	452.85	25.59	386.66	350.77	450.04	24.52	383.75	9.95	423.9	17.67	340.33	7.74	319.12	317.44	306.3	5.27	0	0	0	0	0	0	0	0
216	7801.86	303.41	288.31	318.51	7.7	304.23	73.09	5.55	33.71	4.83	80.22	5.7	40.06	5.33	373.32	14.12	377.5	13.27	386.24	349.34	453.38	25.62	386.74	350.99	449.86	24.42	384.08	9.94	424.05	17.79	340.74	7.76	319.37	317.68	306.64	5.26	0	0	0	0	0	0	0	0
217	7837.98	303.78	288.68	318.87	7.7	304.6	73.04	5.63	33.83	4.95	80.2	5.79	40.12	5.51	373.6	14.31	377.88	13.58	386.4	349.59	453.4	25.56	387.16	351.38	450.35	24.45	384.43	9.95	424.33	18.2	341.11	7.9	319.61	317.93	306.97	5.25	0	0	0	0	0	0	0	0
218	7874.09	304.14	289.05	319.23	7.7	304.93	73.06	5.56	33.94	4.84	80.18	5.69	40.3	5.43	373.99	14.29	378.2	13.59	386.34	349.72	452.97	25.42	386.94	351.41	449.68	24.28	384.74	9.94	424.44	17.94	341.46	7.94	319.86	318.18	307.31	5.24	0	0	0	0	0	0	0	0
219	7910.21	304.5	289.41	319.59	7.7	305.31	73.05	5.58	33.97	4.78	80.14	5.74	40.37	5.41	374.34	14.21	378.48	13.53	386.59	350.03	453.08	25.37	387.13	351.67	449.72	24.22	385.08	9.93	424.67	18.02	341.84	7.85	320.1	318.42	307.64	5.23	0	0	0	0	0	0	0	0
220	7946.33	304.86	289.77	319.95	7.7	305.61	73.03	5.61	34.1	4.85	80.09	5.76	40.45	5.38	374.66	14.36	378.71	13.65	386.59	350.17	452.84	25.28	387.18	351.83	449.61	24.15	385.34	9.92	424.8	18.07	342.13	7.84	320.34	318.67	307.97	5.22	0	0	0	0	0	0	0	0
221	7982.45	305.22	290.14	320.31	7.7	305.82	72.92	5.55	34.14	4.81	79.98	5.73	40.43	5.19	374.73	14.33	378.7	13.66	386.3	350.09	452.16	25.13	387.01	351.82	449.15	24.04	385.44	9.92	424.81	17.94	342.3	7.85	320.58	318.91	308.29	5.2	0	0	0	0	0	0	0	0
222	8018.57	305.58	290.49	320.67	7.7	306.17	73.02	5.53	34.09	4.57	80.06	5.75	40.33	5.05	375.21	14.35	379.17	13.72	386.7	350.5	452.51	25.12	387.64	352.34	449.96	24.11	385.87	9.92	425.42	18.06	342.67	7.89	320.82	319.15	308.62	5.19	0	0	0	0	0	0	0	0
223	8054.69	305.94	290.85	321.02	7.7	306.47	72.96	5.51	34.14	4.57	79.96	5.68	40.45	5.19	375.35	14.14	379.31	13.51	386.77	350.67	452.4	25.05	387.56	352.41	449.62	24.01	386.07	9.92	425.41	17.96	342.95	7.83	321.06	319.39	308.95	5.18	0	0	0	0	0	0	0	0
224	8090.81	306.29	291.21	321.38	7.7	306.84	73.05	5.4	34.23	4.63	80.01	5.59	40.51	5.12	375.88	13.81	379.76	13.23	387.17	351.07	452.77	25.04	387.83	352.74	449.77	23.97	386.49	9.92	425.82	17.66	343.35	7.7	321.29	319.63	309.27	5.17	0	0	0	0	0	0	0	0
225	8126.93	306.65	291.56	321.73	7.7	307.21	73.03	5.43	34.33	4.61	80	5.69	40.59	5.17	376.2	13.99	380.09	13.45	387.22	351.27	452.53	24.93	388.03	353.02	449.84	23.92	386.85	9.92	426.09	17.94	343.73	7.76	321.53	319.87	309.59	5.16	0	0	0	0	0	0	0	0
226	8163.05	307	291.92	322.08	7.69	307.6	73.15	5.41	34.17	4.6	80.04	5.73	40.48	5.08	376.72	14.01	380.49	13.51	388.17	351.97	453.92	25.1	388.65	353.54	450.62	23.98	387.29	9.92	426.67	17.82	344.12	7.72	321.77	320.11	309.91	5.15	0	0	0	0	0	0	0	0
227	8199.17	307.35	292.27	322.43	7.69	307.87	73.1	5.45	34.07	4.58	79.91	5.74	40.45	5.04	376.91	14.3	380.52	13.66	388.53	352.28	454.39	25.14	388.68	353.66	450.53	23.93	387.43	9.9	426.72	17.87	344.35	7.83	322	320.35	310.23	5.13	0	0	0	0	0	0	0	0
228	8235.29	307.69	292.62	322.77	7.69	308.19	73	5.47	34.14	4.6	79.78	5.78	40.49	5.12	377.05	14.19	380.6	13.53	388.5	352.4	454.12	25.05	388.78	353.83	450.5	23.88	387.62	9.89	426.74	18	344.63	7.65	322.23	320.59	310.55	5.12	0	0	0	0	0	0	0	0
229	8271.41	308.04	292.96	323.12	7.69	308.59	73.06	5.36	34	4.68	79.77	5.64	40.35	5.22	377.45	13.89	380.89	13.21	389.41	353.07	455.47	25.21	389.48	354.39	451.49	23.98	388.01	9.9	427.26	17.69	345.01	7.54	322.46	320.82	310.87	5.11	0	0	0	0	0	0	0	0
230	8307.53	308.39	293.31	323.46	7.69	309.03	73.18	5.37	34.04	4.72	79.86	5.69	40.35	5.17	378.03	13.79	381.39	13.23	390.07	353.65	456.26	25.26	390.07	354.93	452.15	24.02	388.54	9.89	427.88	17.67	345.49	7.5	322.69	321.06	311.19	5.1	0	0	0	0	0	0	0	0
231	8343.65	308.73	293.65	323.81	7.69	309.32	73.2	5.38	34.03	4.68	79.9	5.68	40.12	5.06	378.3	13.71	381.63	13.12	390.44	353.99	456.69	25.29	390.89	355.52	453.39	24.18	388.87	9.89	428.48	17.62	345.77	7.41	322.93	321.29	311.5	5.09	0	0	0	0	0	0	0	0
232	8379.77	309.07	294	324.15	7.69	309.66	73.21	5.4	34.11	4.64	79.95	5.73	40.17	4.99	378.63	13.79	382.07	13.31	390.57	354.22	456.59	25.21	391.19	355.85	453.62	24.15	389.27	9.87	428.87	17.73	346.13	7.47	323.15	321.52	311.81	5.07	0	0	0	0	0	0	0	0
233	8415.89	309.41	294.34	324.49	7.69	310.01	73.25	5.38	34.15	4.61	79.99	5.7	40.11	4.86	379.03	13.65	382.48	13.12	390.88	354.56	456.83	25.18	391.66	356.27	454.14	24.18	389.66	9.88	429.37	17.56	346.5	7.39	323.38	321.75	312.13	5.06	0	0	0	0	0	0	0	0
234	8452.01	309.75	294.68	324.82	7.69	310.41	73.31	5.3	34.28	4.71	80.01	5.63	40.24	4.86	379.54	13.48	382.89	13.01	391.11	354.88	456.87	25.12	391.78	356.52	454.02	24.09	390.08	9.88	429.68	17.24	346.92	7.34	323.61	321.99	312.44	5.05	0	0	0	0	0	0	0	0
235	8488.13	310.09	295.02	325.16	7.69	310.77	73.29	5.26	34.29	4.81	79.95	5.55	40.29	4.91	379.85	13.43	383.08	12.88	391.47	355.24	457.26	25.12	391.9	356.74	454	24.03	390.38	9.88	429.87	17	347.27	7.32	323.84	322.22	312.75	5.04	0	0	0	0	0	0	0	0
236	8524.25	310.42	295.35	325.5	7.69	311.1	73.25	5.25	34.33	4.89	79.87	5.53	40.32	4.95	380.16	13.46	383.27	12.92	391.65	355.48	457.33	25.08	391.98	356.91	453.91	23.96	390.63	9.87	430.02	16.91	347.57	7.34	324.07	322.44	313.06	5.02	0	0	0	0	0	0	0	0
237	8560.37	310.76	295.69	325.83	7.69	311.4	73.3	5.4	34.27	4.98	79.93	5.65	40.2	4.95	380.52	13.63	383.66	13.09	392.32	355.99	458.3	25.19	392.68	357.45	454.91	24.07	390.99	9.87	430.56	17.1	347.88	7.28	324.29	322.67	313.36	5.01	0	0	0	0	0	0	0	0
238	8596.49	311.09	296.02	326.16	7.69	311.74	73.23	5.51	34.45	4.98	79.89	5.76	40.27	4.96	380.76	13.88	383.95	13.31	392.12	356.04	457.63	25.02	392.87	357.7	454.98	24.03	391.29	9.86	430.75	17.51	348.22	7.39	324.52	322.9	313.67	5	0	0	0	0	0	0	0	0
239	8632.61	311.42	296.36	326.49	7.69	312.03	73.24	5.38	34.49	5.01	79.83	5.62	40.34	4.96	381.01	13.53	384.1	13	392.3	356.27	457.73	24.99	392.84	357.81	454.73	23.94	391.53	9.85	430.85	17.2	348.5	7.25	324.74	323.13	313.97	4.99	0	0	0	0	0	0	0	0
240	8668.73	311.75	296.69	326.82	7.69	312.35	73.18	5.48	34.62	5.05	79.78	5.69	40.46	4.97	381.22	13.72	384.35	13.13	392.25	356.38	457.37	24.87	392.87	357.96	454.53	23.85	391.8	9.85	430.96	17.43	348.82	7.28	324.97	323.35	314.28	4.97	0	0	0	0	0	0	0	0
241	8704.85	312.08	297.02	327.15	7.69	312.7	73.15	5.46	34.61	5.05	79.68	5.7	40.59	4.94	381.49	13.81	384.49	13.22	392.55	356.7	457.65	24.86	392.77	358.05	454.1	23.73	392.05	9.83	430.98	17.43	349.15	7.34	325.19	323.58	314.58	4.96	0	0	0	0	0	0	0	0
242	8740.97	312.41	297.34	327.48	7.69	312.93	73.07	5.49	34.66	5.03	79.58	5.72	40.66	4.9	381.57	13.89	384.5	13.31	392.43	356.73	457.27	24.76	392.62	358.06	453.68	23.62	392.18	9.82	430.95	17.52	349.35	7.38	325.41	323.8	314.88	4.95	0	0	0	0	0	0	0	0
243	8777.09	312.74	297.67	327.8	7.69	313.26	73	5.44	34.87	5.16	79.48	5.68	40.88	4.99	381.78	13.86	384.66	13.26	392.21	356.76	456.62	24.59	392.38	358.06	453.03	23.46	392.41	9.81	430.86	17.61	349.67	7.48	325.63	324.02	315.18	4.93	0	0	0	0	0	0	0	0
244	8813.21	313.06	298	328.13	7.69	313.59	73	5.39	34.85	5.04	79.4	5.69	40.93	4.85	382.09	13.89	384.89	13.32	392.49	357.06	456.85	24.57	392.39	358.2	452.8	23.37	392.66	9.81	430.99	17.73	349.98	7.5	325.85	324.24	315.48	4.92	0	0	0	0	0	0	0	0
245	8849.33	313.38	298.32	328.45	7.69	313.92	73.02	5.35	34.82	5.12	79.34	5.66	40.89	5.07	382.42	13.64	385.05	13.07	393.09	357.53	457.68	24.66	392.84	358.58	453.39	23.42	392.94	9.81	431.24	17.81	350.29	7.42	326.06	324.47	315.78	4.91	0	0	0	0	0	0	0	0
246	8885.45	313.71	298.64	328.77	7.69	314.22	72.96	5.42	34.85	5.15	79.25	5.71	40.99	5.09	382.59	13.73	385.19	13.18	393.24	357.74	457.73	24.62	392.8	358.69	453.11	23.32	393.15	9.8	431.26	17.98	350.57	7.46	326.28	324.69	316.07	4.9	0	0	0	0	0	0	0	0
247	8921.57	314.03	298.96	329.09	7.69	314.61	72.97	5.31	34.79	5.23	79.28	5.58	40.87	5.02	382.98	13.41	385.55	12.8	393.82	358.23	458.5	24.69	393.4	359.19	453.88	23.39	393.57	9.81	431.83	17.5	350.96	7.31	326.5	324.91	316.37	4.88	0	0	0	0	0	0	0	0
248	8957.69	314.35	299.28	329.41	7.69	314.84	72.92	5.34	34.79	5.22	79.15	5.64	40.96	5.05	383.09	13.49	385.54	12.87	393.94	358.39	458.53	24.66	393.25	359.2	453.48	23.29	393.67	9.8	431.72	17.62	351.16	7.32	326.71	325.12	316.66	4.87	0	0	0	0	0	0	0	0
249	8993.81	314.66	299.6	329.73	7.69	315.21	73.07	5.33	34.84	5.09	79.26	5.6	40.99	5	383.73	13.6	386.1	12.9	394.38	358.83	458.93	24.65	393.7	359.63	453.94	23.3	394.15	9.8	432.28	17.6	351.57	7.4	326.92	325.34	316.96	4.86	0	0	0	0	0	0	0	0
250	9029.93	314.98	299.92	330.04	7.68	315.56	73.08	5.35	34.83	5.09	79.18	5.61	41.06	4.98	384.06	13.48	386.3	12.83	394.77	359.21	459.36	24.66	393.73	359.79	453.75	23.21	394.42	9.8	432.4	17.45	351.9	7.32	327.14	325.56	317.25	4.84	0	0	0	0	0	0	0	0
251	9066.04	315.3	300.23	330.36	7.68	315.85	73.15	5.34	34.75	5.08	79.22	5.61	41.01	4.95	384.46	13.46	386.66	12.81	395.39	359.68	460.23	24.76	394.2	360.19	454.34	23.26	394.75	9.8	432.82	17.45	352.21	7.3	327.35	325.78	317.54	4.83	0	0	0	0	0	0	0	0
252	9102.16	315.61	300.55	330.67	7.68	316.16	73.18	5.49	34.65	5.09	79.18	5.7	40.99	4.99	384.8	13.73	386.85	13.04	396.11	360.22	461.27	24.88	394.52	360.5	454.69	23.26	395.03	9.8	433.07	17.75	352.5	7.39	327.56	325.99	317.83	4.82	0	0	0	0	0	0	0	0
253	9138.28	315.92	300.86	330.98	7.68	316.47	73.1	5.43	34.77	4.92	79.07	5.64	41.13	4.94	385	13.6	386.98	12.8	395.79	360.19	460.44	24.69	394.31	360.51	454.1	23.12	395.23	9.8	433.03	17.65	352.79	7.31	327.78	326.21	318.12	4.8	0	0	0	0	0	0	0	0
254	9174.4	316.23	301.17	331.3	7.68	316.75	73.15	5.35	34.78	4.92	79.13	5.53	41.12	4.9	385.41	13.37	387.4	12.56	396.12	360.5	460.77	24.69	394.68	360.85	454.52	23.14	395.57	9.8	433.44	17.37	353.09	7.21	327.99	326.42	318.4	4.79	0	0	0	0	0	0	0	0
255	9210.52	316.54	301.48	331.61	7.68	317.07	73.25	5.29	34.8	4.82	79.19	5.49	41.11	4.9	385.89	13.23	387.84	12.46	396.47	360.86	461.1	24.69	395.12	361.24	455.02	23.17	395.95	9.8	433.89	17.12	353.44	7.13	328.2	326.63	318.69	4.77	0	0	0	0	0	0	0	0
256	9246.64	316.85	301.79	331.92	7.68	317.38	73.26	5.3	34.75	4.66	79.18	5.54	41.08	4.76	386.19	13.36	388.07	12.64	396.8	361.18	461.42	24.69	395.43	361.55	455.34	23.16	396.25	9.79	434.21	17.38	353.74	7.22	328.4	326.84	318.98	4.76	0	0	0	0	0	0	0	0
257	9282.76	317.16	302.1	332.22	7.68	317.69	73.27	5.29	34.73	4.62	79.14	5.55	41.06	4.69	386.54	13.37	388.28	12.7	397.12	361.5	461.76	24.69	395.65	361.8	455.49	23.14	396.52	9.78	434.46	17.33	354.03	7.19	328.61	327.06	319.26	4.75	0	0	0	0	0	0	0	0
258	9318.88	317.47	302.41	332.53	7.68	317.88	73.1	5.43	34.87	4.8	78.95	5.67	41.17	4.93	386.46	13.52	388.16	12.81	396.84	361.41	461.15	24.56	395.48	361.76	455.13	23.06	396.52	9.77	434.17	17.76	354.17	7.22	328.82	327.27	319.54	4.73	0	0	0	0	0	0	0	0
259	9355	317.77	302.71	332.83	7.68	318.17	73.19	5.37	34.87	4.8	79.03	5.61	41.18	4.94	386.93	13.36	388.58	12.64	397.32	361.81	461.77	24.62	395.9	362.13	455.62	23.09	396.89	9.78	434.61	17.59	354.49	7.13	329.02	327.48	319.83	4.72	0	0	0	0	0	0	0	0
260	9391.12	318.08	303.01	333.14	7.68	318.43	73.19	5.36	34.89	4.77	79.05	5.65	41.15	4.86	387.19	13.41	388.94	12.82	397.5	362.03	461.88	24.59	396.2	362.42	455.94	23.1	397.18	9.79	434.94	17.72	354.76	7.21	329.23	327.69	320.11	4.7	0	0	0	0	0	0	0	0
261	9427.24	318.38	303.32	333.44	7.68	318.74	73.32	5.41	34.9	4.75	79.19	5.73	40.97	4.89	387.8	13.6	389.42	13.06	398.07	362.5	462.58	24.65	397.16	363.11	457.36	23.28	397.63	9.81	435.71	17.88	355.1	7.31	329.43	327.89	320.39	4.69	0	0	0	0	0	0	0	0
262	9463.36	318.68	303.62	333.74	7.69	319.13	73.45	5.43	34.93	4.77	79.35	5.77	40.87	4.95	388.39	13.73	390.09	13.26	398.71	363.05	463.36	24.71	398.15	363.86	458.78	23.45	398.18	9.82	436.52	18.05	355.54	7.39	329.64	328.1	320.67	4.68	0	0	0	0	0	0	0	0
263	9499.48	318.98	303.92	334.04	7.69	319.41	73.44	5.47	35	4.72	79.33	5.87	40.87	4.83	388.63	13.82	390.36	13.46	398.76	363.21	463.2	24.63	398.32	364.08	458.85	23.41	398.44	9.82	436.76	18.21	355.81	7.44	329.84	328.31	320.94	4.66	0	0	0	0	0	0	0	0
264	9535.6	319.28	304.22	334.34	7.69	319.88	73.54	5.27	35.13	4.81	79.39	5.64	40.98	4.91	389.23	13.34	390.89	13	399.13	363.64	463.45	24.58	398.63	364.47	459.01	23.35	398.97	9.84	437.24	17.56	356.32	7.23	330.04	328.51	321.22	4.65	0	0	0	0	0	0	0	0
265	9571.72	319.58	304.51	334.64	7.69	320.12	73.47	5.32	35.19	4.94	79.29	5.67	40.92	5.01	389.39	13.52	390.95	13.07	399.22	363.79	463.45	24.55	398.87	364.69	459.31	23.37	399.11	9.84	437.35	17.71	356.52	7.24	330.24	328.72	321.5	4.63	0	0	0	0	0	0	0	0
266	9607.84	319.88	304.81	334.94	7.69	320.42	73.4	5.37	35.17	5.1	79.17	5.74	40.94	5.03	389.52	13.49	391	13.07	399.58	364.1	463.91	24.58	398.94	364.84	459.24	23.32	399.29	9.83	437.39	17.76	356.78	7.17	330.45	328.93	321.77	4.62	0	0	0	0	0	0	0	0
267	9643.96	320.17	305.11	335.24	7.69	320.7	73.33	5.3	35.22	5.08	79.07	5.62	40.93	4.98	389.71	13.39	391.09	12.9	399.55	364.2	463.65	24.49	398.98	364.97	459.14	23.26	399.47	9.82	437.48	17.46	357.03	7.14	330.65	329.13	322.05	4.6	0	0	0	0	0	0	0	0
268	9680.08	320.47	305.4	335.53	7.69	321.04	73.34	5.22	35.29	5.17	79.04	5.55	41.01	5.06	390.07	13.08	391.38	12.73	399.82	364.5	463.86	24.47	399.14	365.2	459.18	23.21	399.79	9.81	437.68	17.33	357.38	7.01	330.85	329.33	322.32	4.59	0	0	0	0	0	0	0	0
269	9716.2	320.76	305.69	335.83	7.69	321.27	73.41	5.21	35.32	5.11	79.13	5.51	40.98	4.98	390.43	13.12	391.77	12.68	400.05	364.75	464.04	24.46	399.53	365.53	459.65	23.24	400.11	9.81	438.12	17.21	357.63	6.97	331.05	329.54	322.59	4.57	0	0	0	0	0	0	0	0
270	9752.32	321.05	305.99	336.12	7.69	321.56	73.39	5.32	35.36	5.02	79.06	5.58	41.12	4.9	390.75	13.38	391.94	12.83	400.2	364.97	464.05	24.4	399.38	365.58	459.17	23.12	400.33	9.8	438.14	17.32	357.91	7.01	331.25	329.74	322.86	4.56	0	0	0	0	0	0	0	0
271	9788.44	321.34	306.28	336.41	7.69	321.84	73.33	5.3	35.37	4.85	78.95	5.53	41.14	4.84	390.94	13.31	392.02	12.72	400.18	365.09	463.79	24.31	399.33	365.66	458.9	23.03	400.5	9.8	438.18	17.21	358.16	6.95	331.44	329.94	323.13	4.54	0	0	0	0	0	0	0	0
272	9824.56	321.63	306.56	336.7	7.69	322.09	73.28	5.23	35.45	4.85	78.87	5.48	41.24	4.86	391.06	13.04	392.14	12.52	400.17	365.19	463.57	24.23	399.22	365.7	458.52	22.92	400.67	9.8	438.17	17.04	358.39	6.82	331.64	330.14	323.4	4.53	0	0	0	0	0	0	0	0
273	9860.68	321.92	306.85	336.99	7.69	322.39	73.3	5.21	35.46	4.83	78.86	5.5	41.28	4.87	391.38	13	392.41	12.66	400.41	365.46	463.76	24.21	399.43	365.95	458.67	22.9	400.96	9.8	438.42	17.11	358.69	6.89	331.84	330.34	323.67	4.51	0	0	0	0	0	0	0	0
274	9896.8	322.21	307.14	337.28	7.69	322.8	73.45	5.17	35.44	4.87	78.97	5.46	41.26	4.9	392.07	12.89	392.98	12.58	401.16	366.07	464.73	24.3	400.07	366.5	459.46	22.96	401.48	9.81	439.07	16.88	359.14	6.79	332.03	330.54	323.94	4.5	0	0	0	0	0	0	0	0
275	9932.92	322.5	307.43	337.57	7.69	323.01	73.5	5.14	35.4	4.84	79.02	5.38	41.17	4.64	392.36	12.89	393.28	12.47	401.51	366.37	465.19	24.34	400.34	366.75	459.74	22.97	401.74	9.8	439.47	16.5	359.36	6.76	332.23	330.74	324.2	4.48	0	0	0	0	0	0	0	0
276	9969.04	322.78	307.71	337.85	7.69	323.26	73.48	5.15	35.49	4.84	79.02	5.41	41.18	4.65	392.55	12.99	393.52	12.61	401.48	366.46	464.91	24.25	400.57	366.99	459.95	22.96	401.99	9.8	439.71	16.52	359.61	6.8	332.43	330.93	324.47	4.47	0	0	0	0	0	0	0	0
277	10005.2	323.07	307.99	338.14	7.69	323.54	73.47	5.32	35.52	4.79	79	5.53	41.1	4.58	392.8	13.34	393.74	12.77	401.66	366.7	464.98	24.21	400.97	367.34	460.46	23	402.25	9.8	440.03	16.85	359.88	6.82	332.62	331.13	324.74	4.45	0	0	0	0	0	0	0	0
278	10041.3	323.35	308.28	338.42	7.69	323.7	73.34	5.3	35.56	4.74	78.88	5.52	41.16	4.55	392.72	13.37	393.73	12.84	401.39	366.61	464.42	24.09	400.75	367.27	459.99	22.9	402.3	9.78	439.89	16.89	360	6.89	332.81	331.33	325	4.44	0	0	0	0	0	0	0	0
279	10077.4	323.63	308.56	338.71	7.69	324.07	73.43	5.41	35.59	4.77	78.91	5.62	41.22	4.57	393.26	13.48	394.14	12.9	401.95	367.1	465.07	24.13	401.14	367.66	460.36	22.9	402.7	9.78	440.26	17.21	360.39	6.82	333	331.52	325.26	4.42	0	0	0	0	0	0	0	0
280	10113.5	323.91	308.84	338.99	7.69	324.33	73.47	5.31	35.66	4.81	78.93	5.49	41.2	4.57	393.54	13.14	394.39	12.63	402.15	367.33	465.21	24.11	401.46	367.95	460.73	22.91	402.98	9.78	440.59	16.89	360.66	6.72	333.2	331.72	325.52	4.41	0	0	0	0	0	0	0	0
281	10149.6	324.19	309.12	339.27	7.69	324.55	73.49	5.35	35.62	4.87	78.94	5.54	41.13	4.7	393.8	13.31	394.62	12.82	402.56	367.65	465.77	24.17	401.9	368.3	461.37	22.99	403.21	9.77	440.9	17.07	360.87	6.8	333.39	331.91	325.78	4.39	0	0	0	0	0	0	0	0
282	10185.8	324.47	309.4	339.55	7.69	324.91	73.61	5.32	35.63	4.95	79.03	5.53	41.14	4.76	394.34	13.27	395.13	12.79	403.22	368.19	466.65	24.25	402.46	368.78	462.04	23.03	403.66	9.78	441.43	17.1	361.27	6.82	333.58	332.11	326.05	4.37	0	0	0	0	0	0	0	0
283	10221.9	324.75	309.67	339.83	7.69	325.24	73.61	5.27	35.72	4.95	79.03	5.47	41.21	4.75	394.62	13.13	395.42	12.78	403.37	368.43	466.64	24.19	402.65	369.03	462.11	22.99	403.99	9.79	441.69	17.05	361.61	6.8	333.77	332.3	326.3	4.36	0	0	0	0	0	0	0	0
284	10258	325.03	309.95	340.11	7.69	325.6	73.65	5.22	35.74	4.89	79.01	5.44	41.2	4.69	394.97	13.05	395.69	12.76	403.7	368.77	466.9	24.17	402.97	369.36	462.4	22.98	404.33	9.78	442.02	17.08	361.96	6.82	333.96	332.49	326.56	4.34	0	0	0	0	0	0	0	0
285	10294.1	325.31	310.22	340.39	7.7	326	73.84	5.27	35.7	4.85	79.17	5.49	41.08	4.67	395.71	13.25	396.31	12.95	404.58	369.47	468.08	24.3	403.92	370.1	463.73	23.13	404.89	9.8	442.86	17.24	362.41	6.89	334.15	332.68	326.82	4.33	0	0	0	0	0	0	0	0
286	10330.2	325.58	310.5	340.67	7.7	326.32	73.84	5.29	35.66	4.85	79.15	5.51	40.99	4.69	395.97	13.33	396.55	13.05	404.98	369.84	468.56	24.32	404.38	370.49	464.31	23.17	405.19	9.8	443.23	17.33	362.72	6.95	334.34	332.87	327.08	4.31	0	0	0	0	0	0	0	0
287	10366.4	325.86	310.77	340.94	7.7	326.68	73.99	5.29	35.57	4.96	79.3	5.43	40.81	4.75	396.58	13.22	397.1	12.78	405.98	370.56	470.04	24.51	405.45	371.26	465.9	23.38	405.7	9.81	444.07	17.22	363.11	6.77	334.53	333.06	327.33	4.29	0	0	0	0	0	0	0	0
288	10402.5	326.13	311.04	341.22	7.7	326.98	74.07	5.29	35.58	4.99	79.35	5.43	40.78	4.6	396.97	13.32	397.48	12.88	406.4	370.93	470.51	24.53	405.78	371.59	466.23	23.38	406.05	9.81	444.5	17.04	363.43	6.8	334.72	333.25	327.59	4.28	0	0	0	0	0	0	0	0
289	10438.6	326.4	311.31	341.49	7.7	327.2	74	5.16	35.71	4.9	79.28	5.3	40.87	4.48	397.06	13	397.55	12.56	406.08	370.86	469.77	24.37	405.6	371.58	465.76	23.26	406.21	9.8	444.49	16.64	363.64	6.7	334.91	333.44	327.84	4.26	0	0	0	0	0	0	0	0
290	10474.7	326.67	311.58	341.76	7.7	327.48	73.99	5.15	35.7	4.86	79.25	5.33	40.84	4.44	397.31	12.97	397.78	12.63	406.32	371.11	469.97	24.36	405.86	371.84	466	23.26	406.46	9.79	444.74	16.59	363.91	6.67	335.1	333.63	328.1	4.24	0	0	0	0	0	0	0	0
291	10510.8	326.94	311.85	342.04	7.7	327.73	73.99	5.07	35.69	4.78	79.26	5.29	40.85	4.44	397.53	12.78	398.08	12.41	406.53	371.34	470.14	24.34	406.13	372.1	466.29	23.27	406.72	9.79	445	16.51	364.16	6.58	335.29	333.82	328.35	4.23	0	0	0	0	0	0	0	0
292	10547	327.21	312.12	342.31	7.7	327.99	74.05	4.98	35.61	4.77	79.32	5.23	40.78	4.4	397.88	12.63	398.4	12.31	407.05	371.75	470.88	24.42	406.6	372.48	466.9	23.32	407.04	9.79	445.45	16.33	364.44	6.52	335.48	334.01	328.6	4.21	0	0	0	0	0	0	0	0
293	10583.1	327.48	312.39	342.58	7.7	328.37	74.26	4.76	35.47	4.72	79.47	4.99	40.69	4.29	398.54	12.08	399	11.79	408.14	372.54	472.48	24.63	407.35	373.09	467.89	23.42	407.57	9.81	446.22	15.65	364.86	6.34	335.66	334.19	328.85	4.19	0	0	0	0	0	0	0	0
294	10619.2	327.75	312.65	342.85	7.7	328.62	74.19	4.84	35.53	4.62	79.38	5.12	40.74	4.23	398.63	12.2	399.1	11.98	408.04	372.59	472.1	24.52	407.34	373.18	467.71	23.35	407.73	9.81	446.25	15.96	365.09	6.4	335.85	334.38	329.1	4.18	0	0	0	0	0	0	0	0
295	10655.3	328.02	312.92	343.11	7.7	328.97	74.28	4.84	35.53	4.57	79.44	5.15	40.75	4.22	399.1	12.13	399.56	11.99	408.54	373.04	472.68	24.55	407.81	373.61	468.25	23.38	408.14	9.81	446.71	16.03	365.47	6.33	336.04	334.57	329.35	4.16	0	0	0	0	0	0	0	0
296	10691.4	328.28	313.18	343.38	7.7	329.27	74.33	4.88	35.55	4.49	79.47	5.16	40.69	4.08	399.41	12.19	399.84	12.04	408.83	373.35	472.91	24.53	408.21	373.97	468.69	23.4	408.47	9.82	447.13	15.93	365.77	6.34	336.23	334.75	329.6	4.14	0	0	0	0	0	0	0	0
297	10727.5	328.55	313.44	343.65	7.71	329.52	74.23	4.87	35.63	4.39	79.32	5.22	40.73	4.06	399.5	12.17	399.86	12.17	408.58	373.31	472.29	24.39	408.04	373.97	468.26	23.29	408.57	9.81	447.04	15.92	365.97	6.37	336.41	334.94	329.85	4.12	0	0	0	0	0	0	0	0
298	10763.7	328.81	313.7	343.92	7.71	329.73	74.18	4.86	35.55	4.36	79.26	5.26	40.59	4.11	399.56	12.04	399.9	12.16	408.85	373.54	472.64	24.42	408.42	374.26	468.82	23.35	408.72	9.8	447.27	15.92	366.15	6.29	336.6	335.12	330.09	4.11	0	0	0	0	0	0	0	0
299	10799.8	329.07	313.96	344.18	7.71	329.94	74.1	4.81	35.53	4.36	79.15	5.2	40.59	4.02	399.62	12	399.9	12.09	408.91	373.66	472.63	24.38	408.32	374.28	468.52	23.27	408.83	9.79	447.26	15.8	366.33	6.29	336.78	335.3	330.34	4.09	0	0	0	0	0	0	0	0
300	10835.9	329.33	314.22	344.44	7.71	330.16	73.98	4.8	35.7	4.39	79.04	5.17	40.73	4.08	399.62	11.9	399.98	12.01	408.54	373.54	471.8	24.21	408.08	374.23	467.95	23.15	408.94	9.79	447.13	15.76	366.52	6.25	336.96	335.49	330.58	4.07	0	0	0	0	0	0	0	0
301	10872	329.6	314.48	344.71	7.71	330.32	73.98	4.76	35.65	4.43	79.04	5.09	40.6	4.04	399.7	11.72	400.07	11.73	408.85	373.78	472.25	24.26	408.46	374.51	468.52	23.22	409.1	9.79	447.42	15.47	366.67	6.14	337.14	335.67	330.83	4.05	0	0	0	0	0	0	0	0
302	10908.1	329.86	314.74	344.97	7.71	330.6	74.02	4.72	35.65	4.34	79.03	5.04	40.66	3.94	400.03	11.65	400.32	11.64	409.15	374.08	472.55	24.26	408.55	374.68	468.46	23.16	409.37	9.8	447.62	15.24	366.95	6.11	337.32	335.85	331.07	4.03	0	0	0	0	0	0	0	0
303	10944.3	330.12	315	345.23	7.71	330.84	73.96	4.69	35.76	4.34	79	5.03	40.7	4.07	400.14	11.6	400.54	11.61	409.02	374.11	472.13	24.15	408.75	374.89	468.65	23.16	409.58	9.79	447.76	15.23	367.19	6.06	337.5	336.03	331.32	4.02	0	0	0	0	0	0	0	0
304	10980.4	330.37	315.25	345.49	7.71	331.18	74.05	4.66	35.81	4.4	79.1	5.03	40.66	4.16	400.62	11.49	400.97	11.57	409.47	374.53	472.62	24.17	409.41	375.43	469.53	23.24	410.02	9.8	448.34	15.38	367.56	6.04	337.69	336.21	331.56	4	0	0	0	0	0	0	0	0
305	11016.5	330.63	315.51	345.75	7.72	331.41	73.94	4.62	35.89	4.42	78.98	5.02	40.72	4.29	400.66	11.27	401.05	11.34	409.31	374.53	472.18	24.06	409.34	375.47	469.26	23.16	410.13	9.79	448.27	15.34	367.75	5.9	337.86	336.39	331.8	3.98	0	0	0	0	0	0	0	0
306	11052.6	330.89	315.76	346.01	7.72	331.7	73.85	4.54	36.12	4.42	78.87	4.97	40.92	4.24	400.77	11.11	401.16	11.31	408.86	374.41	471.14	23.83	408.99	375.39	468.46	22.98	410.31	9.79	448.15	15.13	368.03	5.89	338.04	336.57	332.04	3.96	0	0	0	0	0	0	0	0
307	11088.8	331.14	316.02	346.27	7.72	331.98	73.78	4.46	36.19	4.3	78.79	4.86	41	4.1	400.85	11.04	401.29	11.23	408.72	374.45	470.65	23.7	408.83	375.42	467.98	22.86	410.51	9.78	448.19	14.81	368.28	5.93	338.22	336.75	332.28	3.94	0	0	0	0	0	0	0	0
308	11124.9	331.4	316.27	346.53	7.72	332.19	73.83	4.53	36.18	4.34	78.8	4.91	40.97	4.1	401.14	11.18	401.51	11.34	409.08	374.76	471.12	23.74	409.12	375.68	468.31	22.88	410.73	9.79	448.45	14.97	368.49	5.96	338.4	336.93	332.52	3.92	0	0	0	0	0	0	0	0
309	11161	331.65	316.52	346.78	7.72	332.4	73.74	4.53	36.28	4.25	78.72	4.87	41.07	4.03	401.19	11.1	401.59	11.23	408.86	374.72	470.55	23.61	408.97	375.68	467.9	22.78	410.87	9.79	448.4	14.91	368.69	5.91	338.58	337.1	332.76	3.9	0	0	0	0	0	0	0	0
310	11197.1	331.91	316.77	347.04	7.72	332.62	73.65	4.63	36.26	4.25	78.58	4.97	41.09	4.05	401.26	11.24	401.59	11.4	408.95	374.86	470.57	23.58	408.91	375.72	467.68	22.71	410.95	9.78	448.33	15.11	368.87	5.95	338.76	337.28	332.99	3.89	0	0	0	0	0	0	0	0
311	11233.2	332.16	317.02	347.3	7.72	332.85	73.65	4.71	36.26	4.31	78.59	5.05	41.06	4.23	401.49	11.32	401.85	11.54	409.25	375.13	470.93	23.6	409.35	376.07	468.29	22.77	411.19	9.78	448.61	15.45	369.09	5.94	338.93	337.46	333.23	3.87	0	0	0	0	0	0	0	0
312	11269.4	332.41	317.27	347.55	7.72	333.09	73.71	4.79	36.34	4.3	78.64	5.12	41.14	4.25	401.84	11.43	402.19	11.66	409.47	375.37	471.09	23.58	409.58	376.31	468.47	22.76	411.48	9.78	448.87	15.67	369.35	5.98	339.11	337.63	333.47	3.85	0	0	0	0	0	0	0	0
313	11305.5	332.66	317.52	347.8	7.73	333.32	73.78	4.76	36.22	4.15	78.68	5.1	41.03	4.2	402.12	11.4	402.44	11.61	410	375.78	471.83	23.67	410.07	376.69	469.15	22.83	411.75	9.78	449.29	15.68	369.59	5.97	339.28	337.81	333.7	3.83	0	0	0	0	0	0	0	0
314	11341.6	332.91	317.76	348.06	7.73	333.71	73.94	4.77	36.12	4.13	78.78	5.16	40.99	4.29	402.75	11.52	402.95	11.75	410.93	376.48	473.16	23.82	410.81	377.29	470.14	22.93	412.24	9.8	449.92	15.89	370.02	6.01	339.46	337.98	333.94	3.81	0	0	0	0	0	0	0	0
315	11377.7	333.16	318.01	348.31	7.73	333.97	74.02	4.66	36.13	4.08	78.87	5.03	40.94	4.22	403.16	11.18	403.35	11.44	411.29	376.81	473.57	23.84	411.27	377.67	470.72	22.98	412.59	9.8	450.41	15.44	370.3	5.84	339.63	338.16	334.17	3.79	0	0	0	0	0	0	0	0
316	11413.8	333.41	318.25	348.56	7.73	334.17	73.9	4.69	36.17	4.05	78.71	5.02	41.03	4.2	403.14	11.23	403.27	11.43	411.17	376.81	473.23	23.76	410.96	377.57	470.09	22.85	412.63	9.79	450.2	15.36	370.46	5.86	339.8	338.33	334.4	3.77	0	0	0	0	0	0	0	0
317	11450	333.65	318.5	348.81	7.73	334.33	73.82	4.72	36.17	4.02	78.61	5.05	41.08	4.15	403.15	11.28	403.28	11.46	411.13	376.85	473.06	23.7	410.83	377.55	469.76	22.77	412.69	9.78	450.11	15.38	370.59	5.86	339.98	338.51	334.64	3.75	0	0	0	0	0	0	0	0
318	11486.1	333.9	318.74	349.06	7.73	334.66	73.84	4.67	36.21	3.91	78.61	5.02	41.09	4.12	403.49	11.27	403.58	11.52	411.35	377.13	473.17	23.66	411.13	377.86	470.02	22.76	413.02	9.78	450.44	15.4	370.92	5.88	340.15	338.68	334.87	3.73	0	0	0	0	0	0	0	0
319	11522.2	334.15	318.98	349.31	7.74	334.82	73.83	4.63	36.14	3.96	78.57	4.96	40.97	4.11	403.62	11.21	403.65	11.37	411.7	377.39	473.7	23.73	411.43	378.1	470.47	22.81	413.14	9.79	450.64	15.29	371.06	5.82	340.32	338.85	335.1	3.71	0	0	0	0	0	0	0	0
320	11558.3	334.39	319.23	349.56	7.74	335.02	73.8	4.61	36.11	3.97	78.51	4.91	40.91	4.08	403.79	11.1	403.76	11.29	411.91	377.58	473.94	23.74	411.53	378.23	470.53	22.79	413.28	9.78	450.78	15.07	371.23	5.79	340.49	339.02	335.33	3.69	0	0	0	0	0	0	0	0
321	11594.4	334.64	319.47	349.81	7.74	335.22	73.76	4.56	36.24	4.01	78.45	4.86	40.96	4.17	403.97	10.98	403.87	11.17	411.72	377.57	473.43	23.62	411.54	378.31	470.4	22.74	413.43	9.77	450.81	14.97	371.42	5.8	340.66	339.19	335.56	3.67	0	0	0	0	0	0	0	0
322	11630.5	334.88	319.71	350.05	7.74	335.48	73.79	4.53	36.25	3.99	78.43	4.81	41.02	4.15	404.3	10.84	404.14	11.05	412	377.85	473.71	23.62	411.63	378.48	470.37	22.69	413.67	9.78	450.97	14.8	371.68	5.73	340.83	339.36	335.79	3.64	0	0	0	0	0	0	0	0
323	11666.7	335.12	319.95	350.3	7.74	335.69	73.69	4.48	36.31	3.94	78.33	4.78	41.01	4.14	404.3	10.65	404.18	10.88	411.85	377.85	473.3	23.52	411.67	378.58	470.31	22.65	413.78	9.77	450.99	14.66	371.86	5.63	341	339.53	336.02	3.62	0	0	0	0	0	0	0	0
324	11702.8	335.36	320.18	350.54	7.74	335.91	73.68	4.47	36.26	3.9	78.32	4.78	40.92	4.05	404.46	10.58	404.33	10.83	412.14	378.11	473.66	23.54	412.01	378.87	470.77	22.69	413.99	9.77	451.28	14.64	372.06	5.56	341.17	339.7	336.25	3.6	0	0	0	0	0	0	0	0
325	11738.9	335.61	320.42	350.79	7.75	336.18	73.71	4.43	36.32	3.83	78.34	4.72	40.91	4.11	404.84	10.51	404.62	10.69	412.29	378.32	473.68	23.5	412.34	379.17	471.15	22.71	414.28	9.76	451.6	14.38	372.34	5.47	341.33	339.87	336.47	3.58	0	0	0	0	0	0	0	0
326	11775	335.85	320.66	351.03	7.75	336.41	73.71	4.47	36.36	3.83	78.37	4.74	40.87	4.04	405.06	10.62	404.86	10.75	412.42	378.5	473.72	23.46	412.66	379.46	471.51	22.73	414.54	9.75	451.93	14.49	372.58	5.53	341.5	340.04	336.7	3.56	0	0	0	0	0	0	0	0
327	11811.1	336.09	320.89	351.28	7.75	336.59	73.7	4.45	36.44	3.83	78.36	4.69	40.88	4.06	405.25	10.58	405.04	10.62	412.4	378.57	473.52	23.4	412.79	379.61	471.61	22.72	414.71	9.75	452.09	14.33	372.76	5.49	341.67	340.21	336.93	3.54	0	0	0	0	0	0	0	0
328	11847.3	336.32	321.13	351.52	7.75	336.73	73.64	4.49	36.5	3.76	78.29	4.75	40.9	3.95	405.37	10.72	405.11	10.77	412.26	378.55	473.17	23.31	412.73	379.62	471.41	22.66	414.78	9.74	452.07	14.45	372.87	5.58	341.83	340.38	337.15	3.52	0	0	0	0	0	0	0	0
329	11883.4	336.56	321.36	351.76	7.75	337.02	73.66	4.56	36.55	3.7	78.28	4.77	40.97	3.83	405.69	10.9	405.39	10.81	412.46	378.8	473.27	23.28	412.82	379.81	471.33	22.6	415.06	9.75	452.27	14.41	373.17	5.57	342	340.54	337.37	3.49	0	0	0	0	0	0	0	0
330	11919.5	336.8	321.6	352	7.76	337.21	73.65	4.49	36.55	3.84	78.26	4.72	40.9	3.83	405.81	10.76	405.54	10.66	412.7	379.01	473.57	23.3	413.1	380.04	471.7	22.63	415.23	9.74	452.49	14.29	373.35	5.51	342.16	340.71	337.6	3.47	0	0	0	0	0	0	0	0
331	11955.6	337.04	321.83	352.24	7.76	337.47	73.74	4.4	36.5	3.78	78.32	4.61	40.84	3.84	406.15	10.5	405.87	10.39	413.2	379.41	474.22	23.36	413.58	380.43	472.33	22.69	415.55	9.75	452.93	14.01	373.62	5.36	342.32	340.88	337.82	3.45	0	0	0	0	0	0	0	0
332	11991.7	337.27	322.06	352.48	7.76	337.58	73.62	4.45	36.56	3.74	78.2	4.68	40.87	3.94	406.08	10.56	405.83	10.48	412.96	379.32	473.75	23.27	413.52	380.43	472.19	22.66	415.54	9.73	452.77	14.41	373.69	5.37	342.49	341.04	338.04	3.43	0	0	0	0	0	0	0	0
333	12027.9	337.51	322.29	352.72	7.76	337.79	73.59	4.41	36.6	3.71	78.17	4.6	40.89	3.92	406.3	10.54	405.99	10.3	412.97	379.42	473.61	23.21	413.56	380.54	472.11	22.61	415.73	9.73	452.9	14.13	373.9	5.32	342.65	341.21	338.27	3.4	0	0	0	0	0	0	0	0
334	12064	337.74	322.52	352.96	7.76	338	73.57	4.37	36.67	3.65	78.14	4.53	40.93	3.81	406.48	10.37	406.15	10.14	412.99	379.52	473.46	23.15	413.57	380.64	471.98	22.55	415.91	9.72	453.02	13.91	374.1	5.25	342.81	341.37	338.49	3.38	0	0	0	0	0	0	0	0
335	12100.1	337.97	322.75	353.2	7.77	338.32	73.77	4.32	36.64	3.62	78.34	4.49	40.83	3.84	407.12	10.3	406.77	10.11	413.78	380.12	474.54	23.27	414.48	381.31	473.27	22.71	416.43	9.73	453.83	13.8	374.48	5.19	342.97	341.54	338.71	3.36	0	0	0	0	0	0	0	0
336	12136.2	338.21	322.98	353.44	7.77	338.54	73.78	4.42	36.7	3.69	78.34	4.55	40.86	3.91	407.37	10.39	406.97	10.19	413.95	380.32	474.66	23.25	414.69	381.52	473.47	22.7	416.65	9.73	454.02	13.98	374.7	5.19	343.13	341.7	338.93	3.33	0	0	0	0	0	0	0	0
337	12172.3	338.44	323.21	353.67	7.77	338.72	73.76	4.46	36.77	3.69	78.29	4.63	40.96	3.91	407.52	10.44	407.1	10.26	413.96	380.41	474.54	23.19	414.61	381.56	473.2	22.63	416.78	9.73	454.01	14.19	374.87	5.21	343.29	341.87	339.15	3.31	0	0	0	0	0	0	0	0
338	12208.5	338.67	323.43	353.91	7.77	338.83	73.56	4.42	36.93	3.74	78.09	4.61	41.02	3.93	407.33	10.42	406.93	10.3	413.34	380.1	473.39	22.99	414.22	381.36	472.49	22.5	416.69	9.72	453.66	14.16	374.92	5.25	343.45	342.03	339.36	3.28	0	0	0	0	0	0	0	0
339	12244.6	338.9	323.66	354.14	7.78	339.06	73.55	4.46	36.97	3.78	78.07	4.66	41.05	3.96	407.52	10.42	407.11	10.32	413.52	380.3	473.52	22.97	414.39	381.55	472.61	22.48	416.9	9.71	453.82	14.39	375.14	5.2	343.61	342.19	339.58	3.26	0	0	0	0	0	0	0	0
340	12280.7	339.13	323.89	354.38	7.78	339.32	73.59	4.44	36.98	3.76	78.07	4.63	41.04	3.95	407.79	10.41	407.35	10.27	413.8	380.58	473.81	22.97	414.64	381.81	472.86	22.48	417.16	9.71	454.09	14.23	375.41	5.22	343.77	342.35	339.8	3.24	0	0	0	0	0	0	0	0
341	12316.8	339.36	324.11	354.61	7.78	339.53	73.46	4.37	37.04	3.82	77.92	4.55	41.05	3.99	407.77	10.21	407.31	10.08	413.66	380.58	473.44	22.88	414.55	381.83	472.6	22.41	417.22	9.7	454	14.07	375.57	5.13	343.92	342.51	340.02	3.21	0	0	0	0	0	0	0	0
342	12352.9	339.59	324.34	354.85	7.78	339.77	73.4	4.43	37.08	3.72	77.88	4.56	40.99	3.93	407.91	10.18	407.47	9.95	413.69	380.7	473.31	22.82	414.83	382.09	472.94	22.43	417.42	9.69	454.22	14.12	375.79	5.05	344.08	342.68	340.23	3.19	0	0	0	0	0	0	0	0
343	12389.1	339.82	324.56	355.08	7.79	339.95	73.39	4.35	37.14	3.77	77.87	4.49	41.04	3.95	408.06	10.07	407.64	9.85	413.72	380.79	473.21	22.77	414.88	382.19	472.88	22.39	417.59	9.68	454.33	13.93	375.97	5.04	344.24	342.84	340.45	3.16	0	0	0	0	0	0	0	0
344	12425.2	340.05	324.78	355.31	7.79	340.12	73.41	4.32	37.13	3.76	77.92	4.43	40.95	3.94	408.26	10.01	407.89	9.74	413.94	380.99	473.47	22.79	415.3	382.5	473.5	22.47	417.81	9.69	454.69	13.7	376.15	4.97	344.39	343	340.66	3.13	0	0	0	0	0	0	0	0
345	12461.3	340.27	325	355.54	7.79	340.4	73.46	4.25	37.1	3.71	77.98	4.36	40.89	3.82	408.58	9.92	408.26	9.62	414.3	381.32	473.89	22.81	415.72	382.87	474	22.5	418.15	9.69	455.15	13.41	376.44	4.93	344.55	343.16	340.88	3.11	0	0	0	0	0	0	0	0
346	12497.4	340.5	325.22	355.77	7.79	340.66	73.5	4.17	37.16	3.72	77.97	4.25	40.98	3.82	408.89	9.59	408.53	9.28	414.53	381.57	474.06	22.79	415.79	383.02	473.92	22.44	418.4	9.7	455.3	13.1	376.71	4.74	344.7	343.32	341.09	3.08	0	0	0	0	0	0	0	0
347	12533.5	340.72	325.44	356	7.8	340.83	73.48	4.12	37.15	3.69	77.95	4.15	40.94	3.78	409	9.42	408.63	9.09	414.68	381.73	474.21	22.79	415.96	383.19	474.11	22.45	418.56	9.7	455.47	12.8	376.87	4.66	344.86	343.47	341.3	3.06	0	0	0	0	0	0	0	0
348	12569.7	340.95	325.66	356.23	7.8	341.03	73.43	4.08	37.13	3.64	77.86	4.12	40.93	3.75	409.11	9.36	408.67	8.92	414.78	381.86	474.24	22.76	415.98	383.27	474.03	22.41	418.67	9.69	455.5	12.66	377.04	4.59	345.01	343.63	341.52	3.03	0	0	0	0	0	0	0	0
349	12605.8	341.17	325.88	356.46	7.8	341.22	73.41	4.23	37.09	3.58	77.83	4.3	40.86	3.76	409.27	9.59	408.81	9.23	415.02	382.09	474.53	22.78	416.34	383.56	474.54	22.46	418.83	9.69	455.7	13.19	377.21	4.65	345.17	343.79	341.73	3	0	0	0	0	0	0	0	0
350	12641.9	341.4	326.1	356.69	7.8	341.37	73.39	4.16	37.08	3.59	77.8	4.2	40.85	3.76	409.35	9.39	408.92	9.01	415.15	382.22	474.66	22.78	416.42	383.66	474.57	22.45	418.95	9.69	455.8	12.91	377.35	4.53	345.32	343.95	341.94	2.98	0	0	0	0	0	0	0	0
351	12678	341.62	326.32	356.92	7.81	341.58	73.43	4.11	36.96	3.62	77.81	4.11	40.7	3.72	409.59	9.35	409.08	8.88	415.69	382.61	475.46	22.88	416.88	384	475.25	22.53	419.17	9.69	456.18	12.66	377.55	4.52	345.47	344.11	342.15	2.95	0	0	0	0	0	0	0	0
352	12714.1	341.84	326.54	357.15	7.81	341.74	73.38	4.26	36.91	3.62	77.76	4.27	40.58	3.75	409.63	9.64	409.16	9.2	415.9	382.79	475.74	22.9	417.23	384.26	475.78	22.59	419.28	9.69	456.36	13.14	377.68	4.64	345.62	344.26	342.36	2.92	0	0	0	0	0	0	0	0
353	12750.2	342.06	326.75	357.37	7.81	342.08	73.51	4.26	36.87	3.56	77.88	4.28	40.51	3.66	410.14	9.59	409.68	9.23	416.55	383.32	476.59	22.98	417.91	384.8	476.67	22.68	419.74	9.7	457.01	13.09	378.06	4.61	345.77	344.42	342.57	2.89	0	0	0	0	0	0	0	0
354	12786.4	342.28	326.97	357.6	7.81	342.34	73.59	4.26	36.82	3.6	77.95	4.27	40.43	3.65	410.5	9.54	410.03	9.18	417.09	383.74	477.32	23.06	418.44	385.23	477.4	22.76	420.07	9.71	457.49	12.97	378.34	4.59	345.92	344.57	342.78	2.86	0	0	0	0	0	0	0	0
355	12822.5	342.5	327.18	357.82	7.82	342.52	73.52	4.19	36.95	3.63	77.9	4.18	40.46	3.72	410.6	9.33	410.09	8.93	416.86	383.69	476.79	22.94	418.46	385.31	477.33	22.72	420.2	9.72	457.54	12.7	378.5	4.47	346.08	344.73	342.99	2.83	0	0	0	0	0	0	0	0
356	12858.6	342.72	327.4	358.05	7.82	342.74	73.61	4.2	36.89	3.67	77.99	4.19	40.33	3.74	410.94	9.27	410.43	8.91	417.44	384.11	477.62	23.04	419.13	385.79	478.32	22.84	420.51	9.72	458.07	12.84	378.74	4.45	346.23	344.89	343.2	2.8	0	0	0	0	0	0	0	0
357	12894.7	342.94	327.61	358.27	7.82	343	73.69	4.14	36.9	3.7	78.07	4.13	40.27	3.8	411.38	9.09	410.81	8.78	417.86	384.47	478.13	23.08	419.69	386.22	479.08	22.93	420.85	9.73	458.55	12.69	379.02	4.38	346.38	345.04	343.4	2.77	0	0	0	0	0	0	0	0
358	12930.9	343.16	327.82	358.5	7.83	343.19	73.72	3.98	36.93	3.61	78.09	3.99	40.3	3.72	411.62	8.72	411.06	8.45	417.96	384.62	478.15	23.05	419.79	386.37	479.11	22.9	421.06	9.74	458.75	12.19	379.22	4.23	346.53	345.19	343.61	2.74	0	0	0	0	0	0	0	0
359	12967	343.38	328.03	358.72	7.83	343.3	73.63	3.82	36.93	3.61	77.97	3.83	40.19	3.82	411.55	8.34	410.95	8.08	417.86	384.6	477.92	23	419.91	386.45	479.31	22.92	421.05	9.73	458.73	11.82	379.28	4.08	346.68	345.35	343.82	2.71	0	0	0	0	0	0	0	0
360	13003.1	343.59	328.24	358.94	7.83	343.47	73.59	3.86	36.92	3.63	77.92	3.87	40.15	3.87	411.63	8.33	411.04	8.14	418.02	384.76	478.11	23	420.1	386.63	479.55	22.94	421.17	9.73	458.84	12.02	379.43	4.12	346.82	345.5	344.02	2.68	0	0	0	0	0	0	0	0
361	13039.2	343.81	328.45	359.17	7.83	343.64	73.52	3.77	36.94	3.6	77.84	3.78	40.16	3.71	411.68	8.09	411.05	7.95	417.99	384.81	477.94	22.95	419.99	386.64	479.25	22.86	421.26	9.71	458.85	11.68	379.57	4.02	346.97	345.65	344.23	2.65	0	0	0	0	0	0	0	0
362	13075.3	344.03	328.66	359.39	7.84	343.88	73.55	3.67	36.98	3.46	77.85	3.68	40.19	3.59	411.98	7.96	411.32	7.76	418.1	384.98	477.91	22.9	420.11	386.81	479.26	22.82	421.51	9.72	459.08	11.28	379.82	3.93	347.12	345.81	344.43	2.62	0	0	0	0	0	0	0	0
363	13111.5	344.24	328.87	359.61	7.84	344.11	73.53	3.66	37	3.46	77.85	3.66	40.17	3.56	412.16	7.99	411.57	7.72	418.24	385.16	478	22.88	420.37	387.05	479.54	22.83	421.75	9.72	459.33	11.2	380.05	3.93	347.27	345.96	344.64	2.59	0	0	0	0	0	0	0	0
364	13147.6	344.46	329.08	359.83	7.84	344.31	73.44	3.63	37.09	3.44	77.71	3.61	40.3	3.52	412.23	7.94	411.57	7.65	418.06	385.14	477.54	22.77	420	386.92	478.77	22.67	421.81	9.71	459.12	10.94	380.21	3.91	347.41	346.11	344.84	2.56	0	0	0	0	0	0	0	0
365	13183.7	344.67	329.29	360.05	7.85	344.53	73.39	3.59	37.15	3.3	77.63	3.57	40.37	3.4	412.41	7.93	411.69	7.6	417.99	385.2	477.23	22.68	419.87	386.94	478.39	22.58	421.95	9.71	459.11	10.74	380.41	3.88	347.56	346.26	345.04	2.52	0	0	0	0	0	0	0	0
366	13219.8	344.88	329.5	360.27	7.85	344.71	73.33	3.42	37.15	3.18	77.55	3.4	40.34	3.16	412.41	7.55	411.7	7.28	417.94	385.24	477.03	22.61	419.82	386.98	478.19	22.52	422.05	9.71	459.16	10.16	380.56	3.76	347.7	346.41	345.24	2.49	0	0	0	0	0	0	0	0
367	13255.9	345.1	329.7	360.49	7.85	344.89	73.32	3.38	37.25	3.12	77.55	3.36	40.35	3.12	412.57	7.48	411.87	7.2	417.88	385.3	476.76	22.54	419.97	387.14	478.32	22.51	422.23	9.7	459.34	10.07	380.74	3.69	347.85	346.56	345.45	2.45	0	0	0	0	0	0	0	0
368	13292	345.31	329.91	360.71	7.86	345.07	73.31	3.37	37.22	3.07	77.52	3.37	40.35	3.04	412.73	7.48	411.99	7.13	418.09	385.49	477	22.55	420.08	387.28	478.38	22.49	422.38	9.71	459.46	10.04	380.91	3.67	347.99	346.71	345.65	2.42	0	0	0	0	0	0	0	0
369	13328.2	345.52	330.11	360.92	7.86	345.28	73.29	3.3	37.25	3.04	77.49	3.3	40.34	2.96	412.89	7.25	412.13	6.96	418.18	385.63	477	22.51	420.22	387.45	478.47	22.47	422.56	9.7	459.62	9.81	381.12	3.55	348.14	346.86	345.85	2.38	0	0	0	0	0	0	0	0
370	13364.3	345.73	330.32	361.14	7.86	345.39	73.23	3.27	37.15	3.02	77.42	3.3	40.2	2.94	412.83	7.15	412.06	6.92	418.37	385.77	477.29	22.55	420.45	387.61	478.84	22.52	422.6	9.69	459.73	9.77	381.18	3.48	348.28	347.01	346.05	2.35	0	0	0	0	0	0	0	0
371	13400.4	345.94	330.52	361.36	7.87	345.6	73.25	3.26	37.15	2.94	77.43	3.26	40.21	2.88	413.03	7.12	412.25	6.82	418.57	385.98	477.47	22.54	420.63	387.81	478.99	22.51	422.82	9.7	459.95	9.65	381.4	3.47	348.43	347.16	346.25	2.31	0	0	0	0	0	0	0	0
372	13436.5	346.15	330.73	361.57	7.87	345.88	73.36	3.17	37.03	2.9	77.52	3.2	40.09	2.75	413.48	6.97	412.67	6.71	419.27	386.5	478.48	22.66	421.26	388.29	479.86	22.6	423.19	9.7	460.53	9.35	381.7	3.41	348.57	347.31	346.45	2.27	0	0	0	0	0	0	0	0
373	13472.6	346.36	330.93	361.79	7.87	346.13	73.48	3.18	36.98	2.91	77.64	3.21	39.98	2.72	413.88	6.95	413.1	6.74	419.87	386.96	479.32	22.76	421.95	388.8	480.86	22.73	423.56	9.7	461.13	9.42	381.98	3.45	348.71	347.46	346.64	2.23	0	0	0	0	0	0	0	0
374	13508.8	346.57	331.13	362.01	7.88	346.29	73.47	3.17	37.02	2.93	77.64	3.23	39.89	2.67	414.04	6.96	413.23	6.79	419.93	387.06	479.3	22.73	422.27	389.05	481.31	22.78	423.72	9.7	461.38	9.47	382.13	3.46	348.85	347.61	346.84	2.2	0	0	0	0	0	0	0	0
375	13544.9	346.78	331.33	362.22	7.88	346.49	73.47	3.08	37.06	2.86	77.6	3.15	39.92	2.65	414.31	6.85	413.41	6.71	419.98	387.18	479.23	22.68	422.3	389.15	481.23	22.73	423.88	9.69	461.47	9.22	382.32	3.43	349	347.75	347.04	2.16	0	0	0	0	0	0	0	0
376	13581	346.98	331.53	362.44	7.88	346.75	73.46	3.14	37.15	2.85	77.59	3.22	39.99	2.66	414.52	6.95	413.66	6.83	420.05	387.34	479.13	22.62	422.42	389.33	481.24	22.69	424.13	9.69	461.64	9.42	382.59	3.44	349.14	347.9	347.24	2.12	0	0	0	0	0	0	0	0
377	13617.1	347.19	331.73	362.65	7.89	346.99	73.46	3.13	37.22	2.82	77.6	3.2	39.94	2.72	414.76	6.91	413.89	6.78	420.14	387.5	479.09	22.57	422.78	389.64	481.7	22.73	424.38	9.7	461.95	9.28	382.82	3.41	349.28	348.05	347.43	2.07	0	0	0	0	0	0	0	0
378	13653.2	347.4	331.93	362.86	7.89	347.18	73.52	2.98	37.21	2.77	77.66	3.04	39.87	2.63	415.02	6.53	414.15	6.44	420.44	387.76	479.44	22.59	423.18	389.95	482.25	22.78	424.63	9.7	462.33	8.78	383.03	3.21	349.42	348.19	347.63	2.03	0	0	0	0	0	0	0	0
379	13689.4	347.6	332.13	363.08	7.89	347.38	73.54	2.91	37.18	2.76	77.65	2.93	39.85	2.65	415.25	6.39	414.32	6.22	420.73	388.01	479.82	22.62	423.38	390.15	482.46	22.79	424.83	9.7	462.53	8.54	383.22	3.18	349.56	348.34	347.83	1.99	0	0	0	0	0	0	0	0
380	13725.5	347.81	332.33	363.29	7.9	347.48	73.49	2.86	37.19	2.67	77.6	2.86	39.84	2.55	415.27	6.3	414.34	6.11	420.69	388.03	479.68	22.58	423.38	390.18	482.4	22.76	424.88	9.7	462.54	8.43	383.3	3.13	349.7	348.49	348.02	1.94	0	0	0	0	0	0	0	0
381	13761.6	348.01	332.53	363.5	7.9	347.75	73.57	2.83	37.16	2.51	77.67	2.84	39.79	2.42	415.63	6.19	414.68	5.97	421.14	388.41	480.23	22.63	423.86	390.58	483.02	22.82	425.22	9.71	463	8.32	383.6	3.04	349.84	348.63	348.21	1.9	0	0	0	0	0	0	0	0
382	13797.7	348.22	332.72	363.71	7.91	348	73.67	2.73	37.08	2.31	77.75	2.74	39.74	2.4	416.07	6.07	415.05	5.78	421.67	388.83	480.95	22.7	424.36	390.98	483.67	22.88	425.55	9.71	463.46	8.05	383.87	2.86	349.98	348.78	348.41	1.85	0	0	0	0	0	0	0	0
383	13833.9	348.42	332.92	363.92	7.91	348.29	73.7	2.65	37.15	2.29	77.79	2.69	39.74	2.35	416.37	5.87	415.37	5.67	421.87	389.07	481.05	22.67	424.72	391.31	484.07	22.9	425.88	9.72	463.83	7.98	384.17	2.79	350.12	348.92	348.6	1.8	0	0	0	0	0	0	0	0
384	13870	348.62	333.12	364.13	7.91	348.51	73.76	2.62	37.07	2.24	77.85	2.69	39.6	2.3	416.64	5.83	415.62	5.69	422.35	389.44	481.72	22.74	425.31	391.74	484.94	23.01	426.16	9.72	464.31	7.9	384.4	2.8	350.26	349.07	348.79	1.75	0	0	0	0	0	0	0	0
385	13906.1	348.83	333.31	364.34	7.92	348.73	73.83	2.47	37.07	2.19	77.92	2.57	39.55	2.3	416.97	5.47	415.91	5.4	422.69	389.74	482.14	22.77	425.76	392.1	485.56	23.07	426.45	9.73	464.72	7.62	384.64	2.64	350.4	349.21	348.99	1.7	0	0	0	0	0	0	0	0
386	13942.2	349.03	333.5	364.55	7.92	348.93	73.83	2.42	37.05	2.17	77.93	2.48	39.48	2.2	417.13	5.33	416.11	5.25	422.93	389.96	482.41	22.78	426.09	392.37	485.98	23.11	426.66	9.73	465.01	7.43	384.84	2.59	350.54	349.35	349.18	1.65	0	0	0	0	0	0	0	0
387	13978.3	349.23	333.7	364.76	7.92	349.11	73.82	2.42	37.03	2.04	77.9	2.49	39.44	2.21	417.29	5.24	416.2	5.16	423.11	390.14	482.59	22.78	426.31	392.57	486.26	23.13	426.81	9.73	465.17	7.53	385	2.51	350.68	349.5	349.37	1.59	0	0	0	0	0	0	0	0
388	14014.4	349.45	333.91	364.99	7.93	349.23	73.76	2.37	37.06	2	77.83	2.43	39.46	2.19	417.3	5.14	416.22	5.02	423.03	390.14	482.38	22.73	426.24	392.57	486.06	23.08	426.86	9.72	465.13	7.35	385.1	2.47	350.82	349.64	349.56	1.54	0	0	0	0	0	0	0	0
389	14050.6	349.63	334.09	365.18	7.93	349.45	73.7	2.32	37.19	2.02	77.77	2.36	39.55	2.18	417.41	4.97	416.37	4.84	422.88	390.15	481.93	22.62	426.16	392.62	485.76	22.99	427.02	9.72	465.14	7.22	385.31	2.39	350.95	349.78	349.75	1.48	0	0	0	0	0	0	0	0
390	14086.7	349.83	334.28	365.39	7.94	349.61	73.73	2.26	37.21	2.05	77.8	2.31	39.49	2.2	417.64	4.82	416.59	4.69	423.06	390.32	482.11	22.62	426.49	392.88	486.23	23.04	427.21	9.72	465.43	7.08	385.47	2.34	351.09	349.92	349.94	1.42	0	0	0	0	0	0	0	0
391	14122.8	350.03	334.47	365.6	7.94	349.81	73.64	2.13	37.32	1.97	77.7	2.19	39.54	2.08	417.68	4.58	416.62	4.45	422.82	390.27	481.54	22.49	426.35	392.87	485.85	22.95	427.31	9.7	465.38	6.7	385.64	2.25	351.23	350.07	350.13	1.35	0	0	0	0	0	0	0	0
392	14158.9	350.23	334.66	365.8	7.94	350.03	73.65	1.92	37.26	1.89	77.7	1.97	39.52	1.89	417.87	4.29	416.82	4.18	423.12	390.54	481.91	22.52	426.51	393.06	485.97	22.94	427.53	9.69	465.62	6.03	385.86	2.19	351.37	350.21	350.32	1.28	0	0	0	0	0	0	0	0
393	14195	350.43	334.85	366.01	7.95	350.24	73.67	1.86	37.33	1.72	77.73	1.89	39.57	1.8	418.07	4.15	417.08	4.02	423.19	390.68	481.85	22.47	426.66	393.24	486.06	22.91	427.77	9.69	465.84	5.84	386.09	2.13	351.5	350.35	350.51	1.21	0	0	0	0	0	0	0	0
394	14231.2	350.63	335.04	366.22	7.95	350.45	73.75	1.78	37.27	1.63	77.8	1.83	39.5	1.67	418.38	4.09	417.38	3.95	423.64	391.03	482.47	22.53	427.11	393.59	486.66	22.98	428.05	9.69	466.26	5.63	386.32	2.12	351.64	350.49	350.7	1.13	0	0	0	0	0	0	0	0
395	14267.3	350.83	335.23	366.42	7.96	350.8	73.96	1.55	37.18	1.45	78.01	1.59	39.4	1.5	419.02	3.52	417.95	3.37	424.54	391.71	483.73	22.68	428.03	394.29	487.95	23.12	428.61	9.73	467.13	4.91	386.73	1.76	351.77	350.63	350.88	1.05	0	0	0	0	0	0	0	0
396	14303.4	351.02	335.42	366.63	7.96	350.96	73.95	1.37	37.03	1.31	77.99	1.4	39.2	1.32	419.09	3.13	418.04	2.98	424.95	392	484.36	22.76	428.5	394.61	488.7	23.23	428.75	9.73	467.45	4.32	386.87	1.55	351.91	350.77	351.07	0.96	0	0	0	0	0	0	0	0
397	14339.5	351.22	335.61	366.83	7.97	351.17	74.03	1.25	36.97	1.21	78.07	1.29	39.12	1.26	419.45	2.79	418.37	2.73	425.42	392.36	485.02	22.84	429.02	395	489.43	23.31	429.04	9.74	467.9	4.01	387.1	1.32	352.05	350.91	351.26	0.86	0	0	0	0	0	0	0	0
398	14375.6	351.41	335.79	367.04	7.97	351.34	74.01	1.2	36.98	1.08	78.03	1.22	39.09	1.09	419.56	2.69	418.48	2.56	425.51	392.49	485.05	22.81	429.14	395.14	489.53	23.3	429.17	9.72	468.02	3.8	387.25	1.27	352.18	351.05	351.44	0.74	0	0	0	0	0	0	0	0
399	14411.8	351.61	335.98	367.24	7.97	351.58	74.03	1	36.98	0.94	78.05	1.01	39.01	0.99	419.79	2.17	418.71	2.08	425.76	392.74	485.3	22.81	429.56	395.48	490.09	23.36	429.43	9.73	468.38	3.12	387.49	0.99	352.32	351.19	351.63	0.61	0	0	0	0	0	0	0	0
400	14447.9	351.81	336.17	367.44	7.98	351.8	74.04	0.7	36.91	0.62	78.05	0.7	38.95	0.69	419.99	1.49	418.94	1.39	426.1	393.02	485.73	22.85	429.85	395.74	490.45	23.38	429.65	9.73	468.66	2.2	387.71	0.62	352.45	351.33	351.82	0.43	0	0	0	0	0	0	0	0
401	14484	352	336.35	367.65	7.98	352	74	0	37	0	78	0	39	0	420.12	0	419.08	0.01	425.99	393.05	485.39	22.76	429.81	395.8	490.23	23.31	429.81	9.73	468.71	0	387.89	0	352.59	351.46	352	0	0	0	0	0	0	0	0	0
